# Supplementary material for: A rhodium-catalyzed cascade C–H activation/annulation strategy for the expeditious assembly of pyrrolidinedione-fused 1,2-benzothiazines
Source: Royal Society of Chemistry journal article supplement (doi:10.1039/d4ob00193a), 2024-01-01
Supplement: d4ob00193a1.pdf [file d4ob00193a1.pdf]

## Electronic Supplementary Information

### Rhodium-Catalyzed Cascade C-H Activation/Annulation Strategy for Expedient Assembly of Pyrrolidinedione-Fused 1,2- Benzothiazines

Yinsong Wu,<sup>a</sup> Guanghao Shi,<sup>a,c</sup> Yanan Liu,<sup>a</sup> Yangzilin Kong,<sup>a</sup> Mengdi Wu,<sup>a</sup> Demao Wang,<sup>a</sup>  
Xiaobing Wu,<sup>b,\*</sup> Yongjia Shang,<sup>a,\*</sup> Xinwei He<sup>a,\*</sup>

<sup>a</sup>Key Laboratory of Functional Molecular Solids, Ministry of Education, Anhui Laboratory of Molecule-Based Materials (State Key Laboratory Cultivation Base), College of Chemistry and Materials Science, Anhui Normal University, Wuhu 241002, P.R. China

<sup>b</sup>Key Laboratory for Conservation and Use of Important Biological Resources of Anhui Province, College of Life Sciences, Anhui Normal University, Wuhu, Anhui 241000, P.R. China

<sup>c</sup>Jiangsu Xidi Pharmaceuticals Co., Ltd., Nantong, 226000, P. R. China

#### Table of Contents

|                                                                              |    |
|------------------------------------------------------------------------------|----|
| 1. General information-----                                                  | S2 |
| 2. General procedure for the synthesis of sulfoximines-----                  | S2 |
| 3. General procedure for the synthesis of indolyl sulfoximine <b>4</b> ----- | S2 |
| 4. General procedure for the synthesis of thienyl sulfoximine <b>6</b> ----- | S3 |
| 5. H/D Exchange experiment-----                                              | S4 |
| 6. General procedure for the competitive experiment-----                     | S4 |
| 7. Kinetic Isotope Effect study-----                                         |    |
| S5                                                                           |    |
| 8. References-----                                                           | S6 |
| 9. X-ray crystallographic data of compound <b>3q</b> -----                   | S7 |
| 10. <sup>1</sup> H and <sup>13</sup> C NMR spectra for all compounds-----    |    |
| S8                                                                           |    |



## 1. General information

**Experimental:** Unless otherwise noted, all the reactions were set up under air atmosphere. Reactions were monitored using thin-layer chromatography (TLC) on Silica Gel plates. Visualization of the developed plates was performed under UV light (245 or 365 nm) stain. Silica-gel flash column chromatography was performed using 200–300 mesh silica gel.

**Materials:** Unless otherwise indicated, starting catalysts and materials were obtained from Energy Chemicals, Bidepharm. Moreover, commercially available reagents were used without additional purification

**Instrumentation:** Melting points were recorded on an uncorrected Melting Point instrument. The  $^1\text{H}$  and  $^{13}\text{C}$  NMR spectra were recorded on a 400 MHz and 100 MHz NMR spectrometers, unless otherwise specified. Chemical shifts ( $\delta$ ) in parts per million were reported relative to the residual signals of chloroform (7.26 ppm for  $^1\text{H}$  and 77.0 ppm for  $^{13}\text{C}$ ) or DMSO- $d_6$  (2.54 ppm for  $^1\text{H}$  and 40.5 ppm for  $^{13}\text{C}$ ), and all  $^{13}\text{C}$  NMR were recorded with proton broadband decoupling and indicated as  $^{13}\text{C}\{^1\text{H}\}$  NMR. Multiplicities are described as s (singlet), d (doublet), t (triplet), q (quartet), or m (multiplet), and the coupling constants ( $J$ ) are reported in Hertz (Hz). HRMS analysis with a quadrupole time-of-flight mass spectrometer yielded ion mass/charge ( $m/z$ ) ratios in atomic mass units.

## 2. General procedure for the synthesis of sulfoximines 1

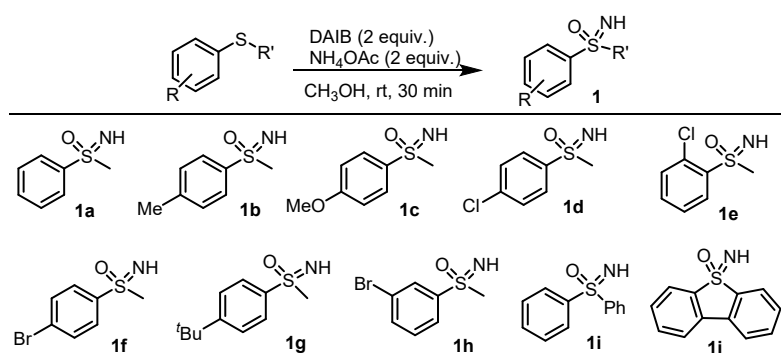

According to the reported literature,<sup>[1]</sup> a mixture of aryl sulfide (5 mol), ammonium acetate (10 mol, 0.77 g), iodobenzene acetate (10 mol, 3.22 g) were added to a 50 mL round-bottomed flask equipped with a stirring bar. Methanol was then added. The resulting mixture was stirred at room temperature for 30 minutes. Upon completion of the reaction, the reaction mixture was cooled to room temperature, evaporation under vacuum to remove the solvent, then extracted with  $\text{CH}_2\text{Cl}_2$  (3 $\times$ 15 mL), and washed with brine. The organic layer was combined, dried over  $\text{Na}_2\text{SO}_4$ , filtered, and then evaporated under a vacuum. The residue was purified using flash column chromatography with a silica gel (200-300 mesh), using ethyl acetate and petroleum ether (1:1, v/v) as the elution solvent to give desired white solid or colorless oily liquid.

## 3. General procedure for the synthesis of indolyl sulfoximine 4

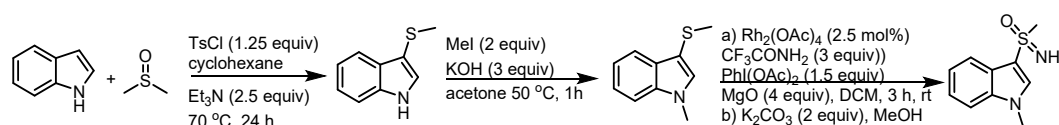

*Step 1:* According to the reported literature,<sup>[2]</sup> a mixture of indole (5 mmol, 0.59 g), DMSO (3 equiv,

15 mmol, 1.1 mL), *p*-toluenesulfonyl chloride (1.25 equiv, 1.19 g) were added to a 50 mL round-bottomed flask equipped with a stirring bar. Cyclohexane (20 mL) was then added. The resulting mixture was stirred in an oil bath preheated to 70 °C for 24 hours. Upon completion of the reaction, the reaction mixture was cooled to room temperature, extracted with EtOAc (3×15 mL), and washed with brine. The organic layer was combined, dried over Na<sub>2</sub>SO<sub>4</sub>, filtered, and then evaporated under a vacuum. The residue was purified using flash column chromatography with a silica gel (200-300 mesh), using ethyl acetate and petroleum ether (1:10 v/v) as the elution solvent to give red liquid 3-(methylthio)-1*H*-indole in 80% yield.

*Step 2:* A mixture of 3-(methylthio)-1*H*-indole (5 mmol, 0.82g), iodomethane (2 equiv, 10 mmol, 0.62 mL), KOH (3 equiv, 1.2 g) were added to a 50 mL round-bottomed flask equipped with a stirring bar. Acetone (20 ml) was then added. The resulting mixture was stirred in an oil bath preheated to 50 °C for 1 hours. Upon completion of the reaction, the reaction mixture was cooled to room temperature, evaporation under vacuum to remove the solvent, then extracted with EtOAc (3×15 mL), and washed with brine. The organic layer was combined, dried over Na<sub>2</sub>SO<sub>4</sub>, filtered, and then evaporated under a vacuum. The residue was purified using flash column chromatography with a silica gel (200-300 mesh), using ethyl acetate and petroleum ether (1:10 v/v) as the elution solvent to give red liquid 1-methyl-3-(methylthio)-1*H*-indole in 90% yield.

*Step 3:* According to the reported literature,<sup>[3]</sup> a mixture of 1-methyl-3-(methylthio)-1*H*-indole (5 mmol, 0.89g), trifluoroacetamide (3 equiv, 1.7 g), Rh<sub>2</sub>(OAc)<sub>4</sub> (2.5 mol%, 55 mg), PIDA (1.5 equiv, 2.4 g), MgO (4 equiv, 20 mmol, 0.8 g) were added to a 50 mL round-bottomed flask equipped with a stirring bar. The resulting mixture was stirred at room temperature for 3 hours. Upon completion of the reaction, vacuum pumping removes most of the solids. extracted with CH<sub>2</sub>Cl<sub>2</sub> (3×15 mL), and washed with brine. The organic layer was combined, dried over Na<sub>2</sub>SO<sub>4</sub>, filtered, and then evaporated under a vacuum. Purification is not required, then K<sub>2</sub>CO<sub>3</sub> (2 equiv, 10 mmol, 1.38 g) and methanol (20 mL) was added, the resulting mixture was stirred at room temperature for 2 hours. Upon completion of the reaction, evaporation under vacuum to remove the solvent, then extracted with CH<sub>2</sub>Cl<sub>2</sub> (3×15 mL), and washed with brine. The organic layer was combined, dried over Na<sub>2</sub>SO<sub>4</sub>, filtered, and then evaporated under a vacuum. The residue was purified using flash column chromatography with a silica gel (200-300 mesh), using ethyl acetate and petroleum ether (1:3 v/v) to give white solid imino(methyl)(1-methyl-1*H*-indol-3-yl)-λ<sup>6</sup>-sulfanone in 87% yield. mp 134-135 °C; <sup>1</sup>H NMR (400 MHz, CDCl<sub>3</sub>) δ 7.97 (d, *J* = 8.0 Hz, 1H), 7.64 (s, 1H), 7.34 (t, *J* = 8.0 Hz, 1H), 7.31 (t, *J* = 6.8 Hz, 1H), 7.27 (t, *J* = 7.6 Hz, 1H), 3.15 (s, 3H), 3.17 (s, 3H), 2.95 (s, 1H); <sup>13</sup>C NMR (100 MHz, CDCl<sub>3</sub>) δ 137.3, 133.8, 124.4, 123.3, 122.0, 119.6, 116.3, 110.3, 46.7, 33.4; HRMS (ESI-TOF) *m/z*: [M+H]<sup>+</sup> calcd for C<sub>10</sub>H<sub>13</sub>N<sub>2</sub>OS 209.0743; found 209.0736.

#### 4. General procedure for the synthesis of thienyl sulfoximine 6

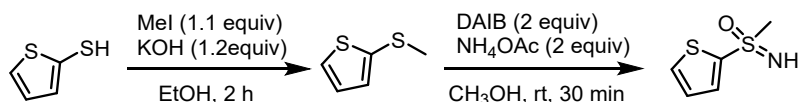

*Step 1:* According to the reported literature,<sup>[4]</sup> a mixture of thiophene-2-thiol (1.0 equiv, 5 mmol, 0.58 g), iodomethane (1.1 equiv., 5.5 mmol, 0.34 mL), NaOH (1.2 equiv., 6 mmol, 0.24 g) were added to a 50 mL round-bottomed flask equipped with a stirring bar. Ethanol (20 mL) was then added. The resulting mixture was stirred at room temperature for 2 hours. Upon completion of the reaction, evaporation under vacuum to remove the solvent, then extracted with EtOAc (3×15 mL).

The organic layer was combined, dried over Na<sub>2</sub>SO<sub>4</sub>, filtered, and then evaporated under a vacuum. The residue was purified using flash column chromatography with a silica gel (200-300 mesh), using ethyl acetate and petroleum ether (1:100 v/v), to obtain red solid 2-(methylthio)thiophene in 79% yield.

*Step 2:* According to the reported literature,<sup>[5]</sup> a mixture of 2-(methylthio)thiophene (5 mol, 0.65 g), ammonium acetate (10 mol, 0.77 g), iodobenzene acetate (10 mol, 3.22 g) were added to a 50 mL round-bottomed flask equipped with a stirring bar. Methanol (20 mL) was then added. The resulting mixture was stirred at room temperature for 30 minute. Upon completion of the reaction, evaporation under vacuum to remove the solvent, then extracted with EtOAc (3×15 mL). The organic layer was combined, dried over Na<sub>2</sub>SO<sub>4</sub>, filtered, and then evaporated under a vacuum. The residue was purified using flash column chromatography with a silica gel (200-300 mesh), using ethyl acetate and petroleum ether (1:1 v/v) to obtain colorless oily liquid imino(methyl)(thiophen-2-yl)-λ<sup>6</sup>-sulfanone in 69% yield. mp 162-163 °C; <sup>1</sup>H NMR (400 MHz, CDCl<sub>3</sub>) δ 7.56-7.54 (m, 2H), 7.00 (dd, *J* = 4.0 Hz, *J* = 4.0 Hz, 1H), 3.17 (s, 1H), 3.11 (s, 3H); <sup>13</sup>C NMR (100 MHz, CDCl<sub>3</sub>) δ 145.5, 133.4, 133.0, 127.8, 47.3; HRMS (ESI-TOF) *m/z*: [M+H]<sup>+</sup> calcd for C<sub>5</sub>H<sub>8</sub>NOS<sub>2</sub> 162.0042; found 162.0047.

## 5. H/D Exchange experiment

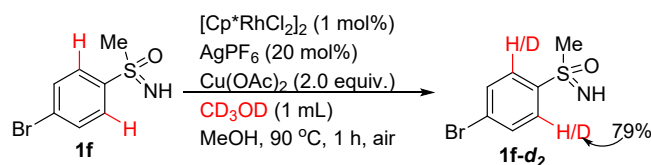

A mixture of **1f** (0.2 mmol), [RhCp\*Cl<sub>2</sub>]<sub>2</sub> (1 mol%, 3 mg), AgPF<sub>6</sub> (20 mol %, 34 mg), Cu(OAc)<sub>2</sub> (2 equiv, 80 mg) CD<sub>3</sub>OD (1 ml) were added to a 15 mL round-bottomed flask equipped with a stirring bar. Methanol (3 mL) was then added. The resulting mixture was stirred in an oil bath preheated to 90 °C for 1 hours. Upon completion of the reaction, the reaction mixture was cooled to room temperature, extracted with CH<sub>2</sub>Cl<sub>2</sub> (3×10 mL). The organic layer was combined, dried over Na<sub>2</sub>SO<sub>4</sub>, filtered, and then evaporated under a vacuum. The residue was purified using flash column chromatography with a silica gel (200-300 mesh), using ethyl acetate and petroleum ether (1:1, v/v) to obtain the desired products **1f-d<sub>2</sub>** in 70% yield. 79 % of the hydrogen in the ortho-position of imine is deuterated.

## 6. General procedure for the competitive experiment

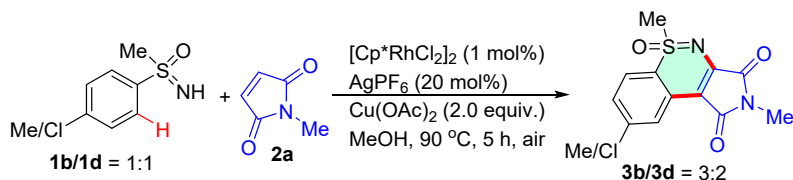

A mixture of **1b** (0.1 mmol), **1d** (0.1 mmol), **2a** (0.25 mmol), [RhCp\*Cl<sub>2</sub>]<sub>2</sub> (1 mol%, 3 mg), AgPF<sub>6</sub> (20 mol %, 34 mg), Cu(OAc)<sub>2</sub> (2 equiv, 80 mg) were added to a 15 mL round-bottomed flask equipped with a stirring bar. Methanol (3 mL) was then added. The resulting mixture was stirred in an oil bath preheated to 90 °C for 5 hours. Upon completion of the reaction, the reaction mixture was cooled to room temperature, extracted with CH<sub>2</sub>Cl<sub>2</sub> (3×10 mL). The organic layer was

combined, dried over Na<sub>2</sub>SO<sub>4</sub>, filtered, and then evaporated under a vacuum. The residue was purified using flash column chromatography with a silica gel (200-300 mesh), using ethyl acetate and petroleum ether (1:3, v/v) to obtain the desired products **3b** and **3d** in a ratio of 1:1.5.

## 7. Kinetic Isotope Effect study

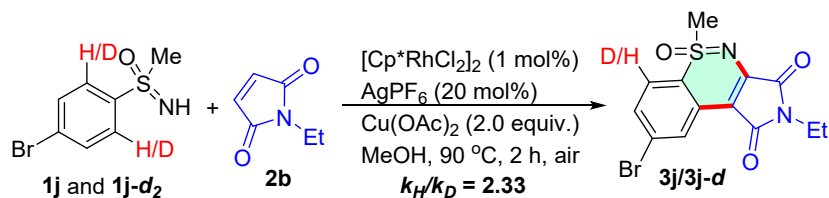

A mixture of **1j** (0.1 mmol), **1j-d<sub>2</sub>** (0.1 mmol), **2b** (0.25 mmol), [Cp\*RhCl<sub>2</sub>]<sub>2</sub> (1 mol%, 3 mg), AgPF<sub>6</sub> (20 mol %, 34 mg), Cu(OAc)<sub>2</sub> (2 equiv., 80 mg) were added to a 15 mL round-bottomed flask equipped with a stirring bar. Methanol (3 mL) was then added. The resulting mixture was stirred in an oil bath preheated to 90 °C for 2 hours. Upon completion of the reaction, the reaction mixture was cooled to room temperature, extracted with CH<sub>2</sub>Cl<sub>2</sub> (3×10 mL). The organic layer was combined, dried over Na<sub>2</sub>SO<sub>4</sub>, filtered, and then evaporated under a vacuum. The residue was purified using flash column chromatography with a silica gel (200-300 mesh), using ethyl acetate and petroleum ether (1:3, v/v) to obtain the mixture products **3j** and **3j-d**. The KIE experiment result was detected by NMR. A KIE value ( $k_H/k_D$ ) was determined to be 2.33 by the <sup>1</sup>H NMR test.

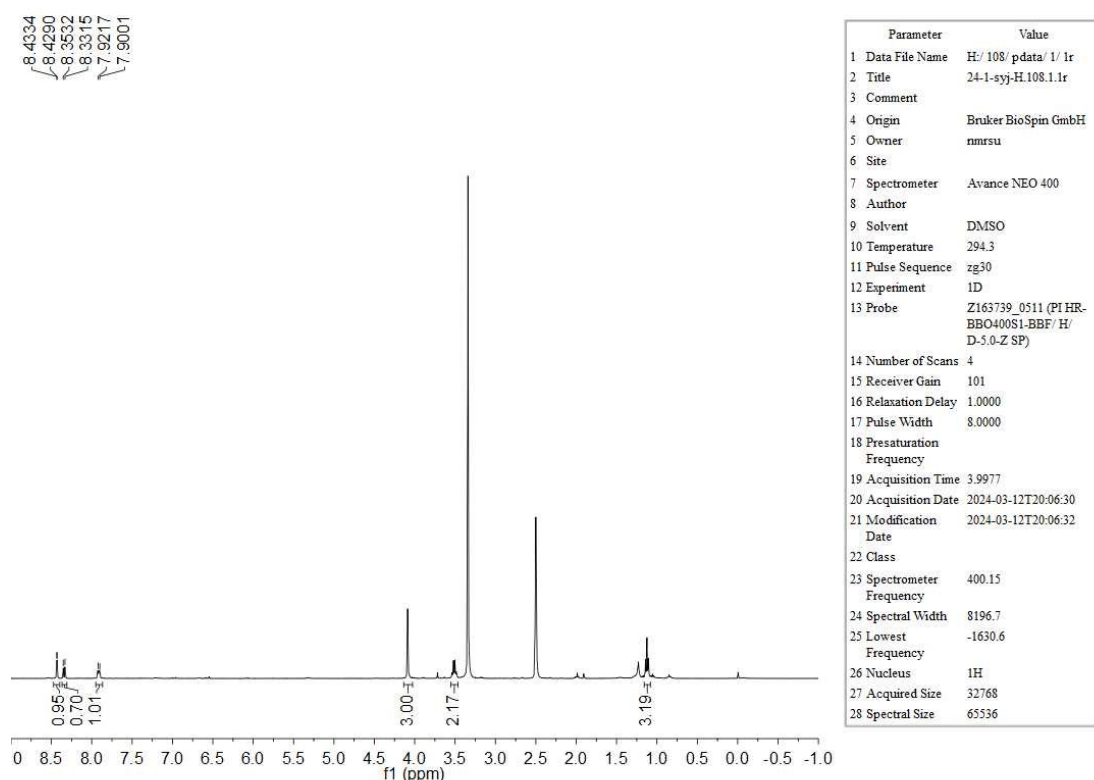

## 8. References:

- [1] Y. Cheng and C. Bolm, *Angew. Chem. Int. Ed.*, 2015, **54**, 12349-12352.
- [2] L.-Y. Zhang, Y.-H. Wu, N.-X. Wang, X.-W. Gao, Z. Yan, B.-C. Xu, N. Liu, B.-Z. Wang and Y. Xing, *Eur. J. Org. Chem.*, 2021, **2021**, 1446-1451.
- [3] H. Okamura and C. Bolm, *Org. Lett.*, 2004, **6**, 1305-1307.
- [4] Z. Hloušková, M. Klikar, O. Pytela, N. Almonasy, A. Růžička, V. Jandová and F. Bureš, *RSC adv.*, 2019, **9**, 23797-23809.
- [5] C. Kang, M. Li, W. Huang, S. Wang, M. Peng, L. Zhao, G. Jiang and F. Ji, *Green Chem.*, 2023, **25**, 8838-8844.

## 9. X-ray crystallographic data of compound 3q

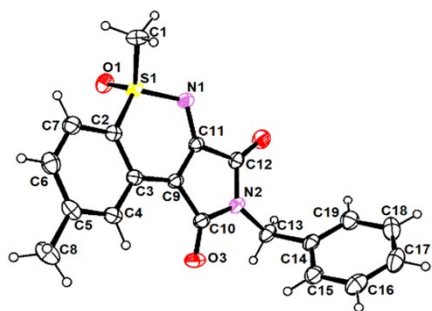

The purified compound **3q** is dissolved in a mixed solvent of dichloromethane and *n*-hexane, and placed in a dark cabinet to slowly evaporate. After several days, a colourless bulk crystal is obtained. The X-ray crystal-structure determinations were obtained on a Bruker Smart CCD C APEX-2 diffractometer (graphite-monochromated Mo  $K\alpha$  radiation,  $\lambda=0.71073$  nm) at 293.15 K.

**Figure S1.** ORTEP drawing of compound **3q** (30% probability for the thermal ellipsoid).

**Table S1.** Crystal data and structure refinement for compound **3q**.

|                                      |                                                                                                                                   |
|--------------------------------------|-----------------------------------------------------------------------------------------------------------------------------------|
| CCDC number                          | 2328549                                                                                                                           |
| Identification code                  | 330831d_0m_a                                                                                                                      |
| Empirical formula                    | $C_{19}H_{16}N_2O_3S$                                                                                                             |
| Formula weight                       | 352.40                                                                                                                            |
| Temperature                          | 293.15 K                                                                                                                          |
| Wavelength                           | 0.71073 Å                                                                                                                         |
| Crystal system                       | orthorhombic                                                                                                                      |
| Space group                          | $P2_1/c$                                                                                                                          |
| Unit cell dimensions                 | $a = 11.45(2)$ Å $\alpha = 90^\circ$ .<br>$b = 8.899(16)$ Å $\beta = 101.80(3)^\circ$ .<br>$c = 17.03(3)$ Å $\gamma = 90^\circ$ . |
| Volume                               | $1698(6)$ Å <sup>3</sup>                                                                                                          |
| Z                                    | 4                                                                                                                                 |
| Density (calculated)                 | $1.379$ Mg/m <sup>3</sup>                                                                                                         |
| Absorption coefficient               | $0.211$ mm <sup>-1</sup>                                                                                                          |
| F(000)                               | 736.0                                                                                                                             |
| Crystal size                         | $0.16 \times 0.15 \times 0.13$ mm <sup>3</sup>                                                                                    |
| 2 $\theta$ range for data collection | 3.636 to 55.012°.                                                                                                                 |
| Index ranges                         | $-14 \leq h \leq 14, -11 \leq k \leq 11, -21 \leq l \leq 22$                                                                      |
| Reflections collected                | 18605                                                                                                                             |
| Independent reflections              | 3868 [ $R_{int} = 0.0336, R_{sigma} = 0.0279$ ]                                                                                   |
| Data / restraints / parameters       | 3868/0/228                                                                                                                        |
| Goodness-of-fit on $F^2$             | 1.053                                                                                                                             |
| Final R indices [ $I > 2\sigma(I)$ ] | $R_1 = 0.0391, wR_2 = 0.1077$                                                                                                     |
| R indices (all data)                 | $R_1 = 0.0505, wR_2 = 0.1160$                                                                                                     |
| Largest diff. peak and hole          | 0.31 and -0.39 e.Å <sup>-3</sup>                                                                                                  |



## 10. <sup>1</sup>H and <sup>13</sup>C NMR spectra for all compounds

### Imino(methyl)(1-methyl-1*H*-indol-3-yl)-λ<sup>6</sup>-sulfanone (4)

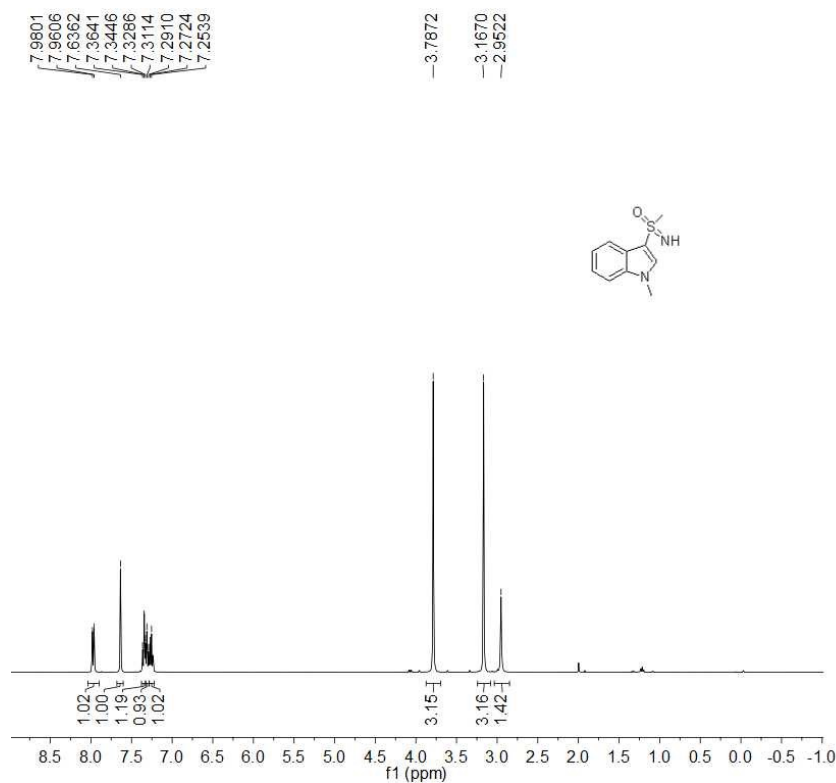

| Parameter                  | Value                                           |
|----------------------------|-------------------------------------------------|
| 1 Data File Name           | C:/ 227/pdata/ 1/ 1r                            |
| 2 Title                    | 23-1-syj-H.227.1.1r                             |
| 3 Comment                  |                                                 |
| 4 Origin                   | Bruker BioSpin GmbH                             |
| 5 Owner                    | nmsu                                            |
| 6 Site                     |                                                 |
| 7 Spectrometer             | Avance NEO 400                                  |
| 8 Author                   |                                                 |
| 9 Solvent                  | CDCl3                                           |
| 10 Temperature             | 296.5                                           |
| 11 Pulse Sequence          | zg30                                            |
| 12 Experiment              | 1D                                              |
| 13 Probe                   | Z163739_0511 (PIHR-BBO400S1-BBF/ H/ D-5.0-Z SP) |
| 14 Number of Scans         | 4                                               |
| 15 Receiver Gain           | 42                                              |
| 16 Relaxation Delay        | 1.0000                                          |
| 17 Pulse Width             | 8.0000                                          |
| 18 Presaturation Frequency |                                                 |
| 19 Acquisition Time        | 3.9977                                          |
| 20 Acquisition Date        | 2023-05-04T22:07:38                             |
| 21 Modification Date       | 2023-05-04T22:07:44                             |
| 22 Class                   |                                                 |
| 23 Spectrometer Frequency  | 400.15                                          |
| 24 Spectral Width          | 8196.7                                          |
| 25 Lowest Frequency        | -1627.4                                         |
| 26 Nucleus                 | <sup>1</sup> H                                  |
| 27 Acquired Size           | 32768                                           |
| 28 Spectral Size           | 65536                                           |

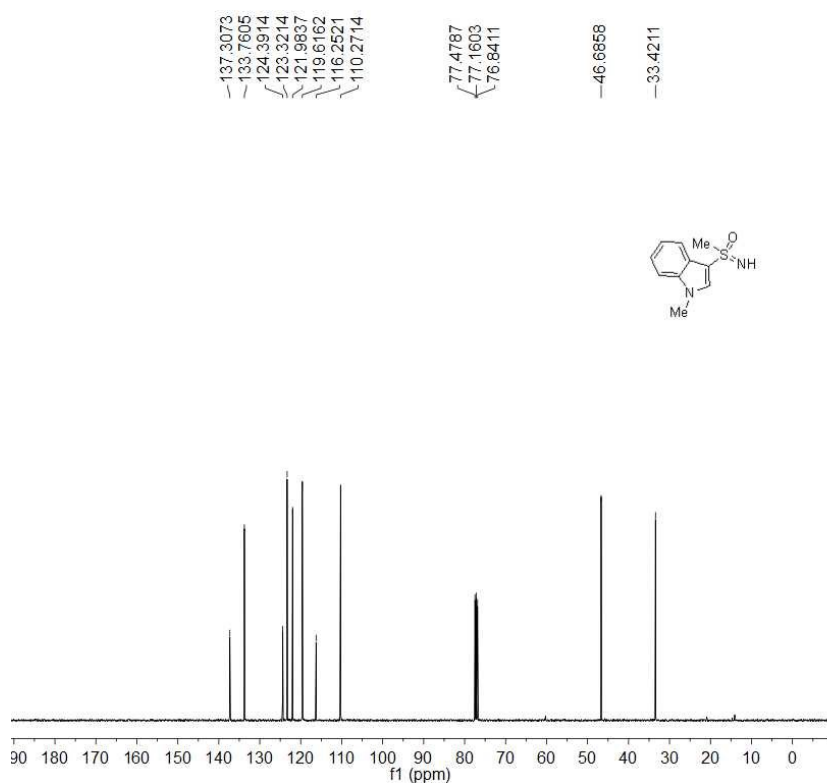

| Parameter                  | Value                                           |
|----------------------------|-------------------------------------------------|
| 1 Data File Name           | C:// 64/pdata/ 1/ 1r                            |
| 2 Title                    | 23-1-syj-C.64.1.1r                              |
| 3 Comment                  |                                                 |
| 4 Origin                   | Bruker BioSpin GmbH                             |
| 5 Owner                    | nmsu                                            |
| 6 Site                     |                                                 |
| 7 Spectrometer             | Avance NEO 400                                  |
| 8 Author                   |                                                 |
| 9 Solvent                  | CDCl3                                           |
| 10 Temperature             | 297.1                                           |
| 11 Pulse Sequence          | zgpg30                                          |
| 12 Experiment              | 1D                                              |
| 13 Probe                   | Z163739_0511 (PIHR-BBO400S1-BBF/ H/ D-5.0-Z SP) |
| 14 Number of Scans         | 200                                             |
| 15 Receiver Gain           | 28                                              |
| 16 Relaxation Delay        | 2.0000                                          |
| 17 Pulse Width             | 8.0000                                          |
| 18 Presaturation Frequency |                                                 |
| 19 Acquisition Time        | 1.3763                                          |
| 20 Acquisition Date        | 2023-05-05T02:59:16                             |
| 21 Modification Date       | 2023-05-05T02:59:24                             |
| 22 Class                   |                                                 |
| 23 Spectrometer Frequency  | 100.62                                          |
| 24 Spectral Width          | 23809.5                                         |
| 25 Lowest Frequency        | -1843.0                                         |
| 26 Nucleus                 | <sup>13</sup> C                                 |
| 27 Acquired Size           | 32768                                           |
| 28 Spectral Size           | 32768                                           |

### Imino(methyl)(thiophen-2-yl)-λ<sup>6</sup>-sulfanone (6)

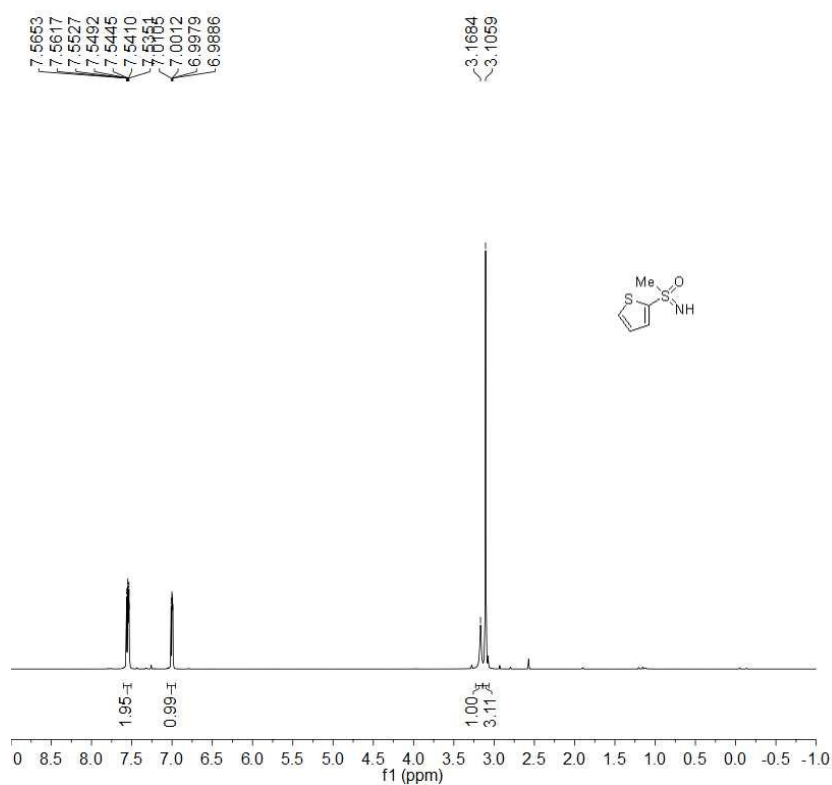

| Parameter                  | Value                                          |
|----------------------------|------------------------------------------------|
| 1 Data File Name           | H/ 98/ pdata/ 1/ 1r                            |
| 2 Title                    | pdata/ 1                                       |
| 3 Comment                  |                                                |
| 4 Origin                   | Bruker BioSpin GmbH                            |
| 5 Owner                    | nmsu                                           |
| 6 Site                     |                                                |
| 7 Spectrometer             | Avance NEO 400                                 |
| 8 Author                   |                                                |
| 9 Solvent                  | CDCl3                                          |
| 10 Temperature             | 294.1                                          |
| 11 Pulse Sequence          | zg30                                           |
| 12 Experiment              | 1D                                             |
| 13 Probe                   | Z163739_0032 (PI HR-400-S1-BBF/ H/ D-5.0-Z SP) |
| 14 Number of Scans         | 4                                              |
| 15 Receiver Gain           | 32                                             |
| 16 Relaxation Delay        | 1.0000                                         |
| 17 Pulse Width             | 10.0000                                        |
| 18 Presaturation Frequency |                                                |
| 19 Acquisition Time        | 3.9977                                         |
| 20 Acquisition Date        | 2024-03-08T20:27:28                            |
| 21 Modification Date       | 2024-03-08T20:27:14                            |
| 22 Class                   |                                                |
| 23 Spectrometer Frequency  | 400.13                                         |
| 24 Spectral Width          | 8196.7                                         |
| 25 Lowest Frequency        | -1637.2                                        |
| 26 Nucleus                 | 1H                                             |
| 27 Acquired Size           | 32768                                          |
| 28 Spectral Size           | 65536                                          |

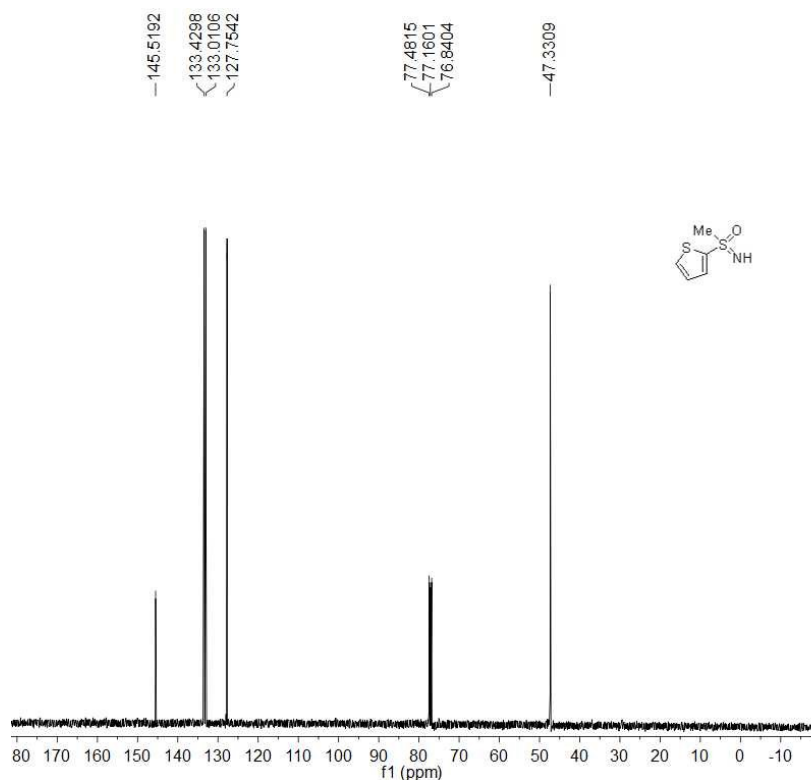

| Parameter                  | Value                                          |
|----------------------------|------------------------------------------------|
| 1 Data File Name           | H/ 10/ pdata/ 1/ 1r                            |
| 2 Title                    | pdata/ 1                                       |
| 3 Comment                  |                                                |
| 4 Origin                   | Bruker BioSpin GmbH                            |
| 5 Owner                    | nmsu                                           |
| 6 Site                     |                                                |
| 7 Spectrometer             | Avance NEO 400                                 |
| 8 Author                   |                                                |
| 9 Solvent                  | CDCl3                                          |
| 10 Temperature             | 294.3                                          |
| 11 Pulse Sequence          | zgpg30                                         |
| 12 Experiment              | 1D                                             |
| 13 Probe                   | Z163739_0032 (PI HR-400-S1-BBF/ H/ D-5.0-Z SP) |
| 14 Number of Scans         | 35                                             |
| 15 Receiver Gain           | 18                                             |
| 16 Relaxation Delay        | 2.0000                                         |
| 17 Pulse Width             | 10.0000                                        |
| 18 Presaturation Frequency |                                                |
| 19 Acquisition Time        | 1.3763                                         |
| 20 Acquisition Date        | 2024-03-08T20:44:25                            |
| 21 Modification Date       | 2024-03-08T20:44:10                            |
| 22 Class                   |                                                |
| 23 Spectrometer Frequency  | 100.61                                         |
| 24 Spectral Width          | 23809.5                                        |
| 25 Lowest Frequency        | -1862.4                                        |
| 26 Nucleus                 | 13C                                            |
| 27 Acquired Size           | 32768                                          |
| 28 Spectral Size           | 32768                                          |

2,5-Dimethyl-1*H*-5λ<sup>4</sup>-benzo[e]pyrro[3,4-*c*][1,2]thiazine-1,3(2*H*)-dione-5-oxide (product 3a)

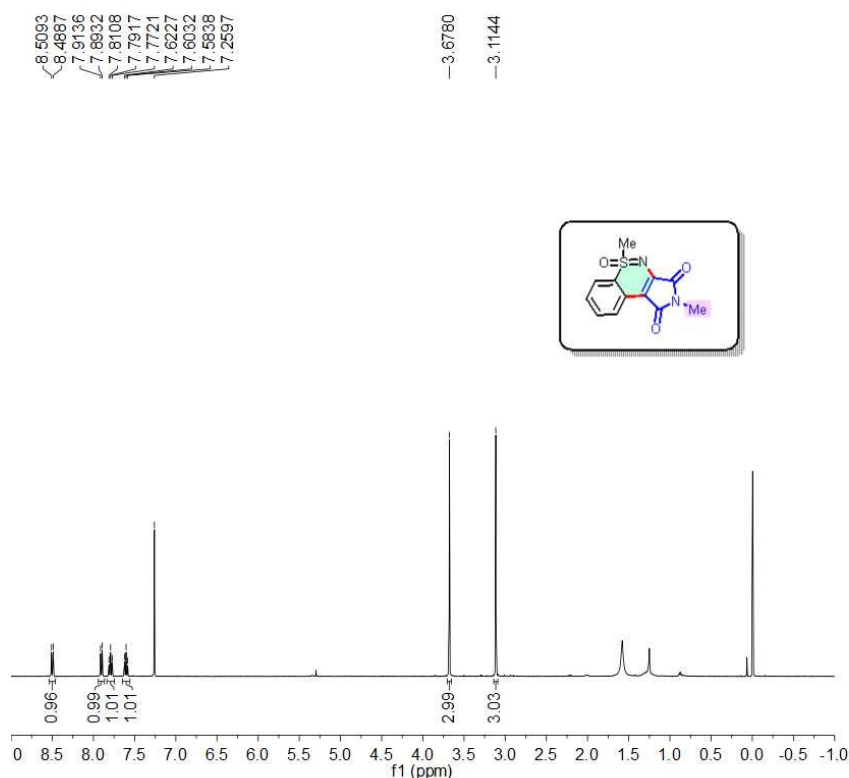

| Parameter                  | Value                                           |
|----------------------------|-------------------------------------------------|
| 1 Data File Name           | D:/ 640/ pdata/ 1/ 1r                           |
| 2 Title                    | 22-1-syj-H.640.1.1r                             |
| 3 Comment                  |                                                 |
| 4 Origin                   | Bruker BioSpin GmbH                             |
| 5 Owner                    | nmrsu                                           |
| 6 Site                     |                                                 |
| 7 Spectrometer             | Avance NEO 400                                  |
| 8 Author                   |                                                 |
| 9 Solvent                  | CDCl3                                           |
| 10 Temperature             | 295.1                                           |
| 11 Pulse Sequence          | zg30                                            |
| 12 Experiment              | 1D                                              |
| 13 Probe                   | Z163739_0511 (PI HR-BBO400S1-BBF/ H/D-5.0-Z SP) |
| 14 Number of Scans         | 4                                               |
| 15 Receiver Gain           | 101                                             |
| 16 Relaxation Delay        | 1.0000                                          |
| 17 Pulse Width             | 8.0000                                          |
| 18 Presaturation Frequency |                                                 |
| 19 Acquisition Time        | 3.9977                                          |
| 20 Acquisition Date        | 2022-06-29T11:07:02                             |
| 21 Modification Date       | 2022-06-29T11:07:10                             |
| 22 Class                   |                                                 |
| 23 Spectrometer Frequency  | 400.15                                          |
| 24 Spectral Width          | 8196.7                                          |
| 25 Lowest Frequency        | -1637.4                                         |
| 26 Nucleus                 | 1H                                              |
| 27 Acquired Size           | 32768                                           |
| 28 Spectral Size           | 65536                                           |

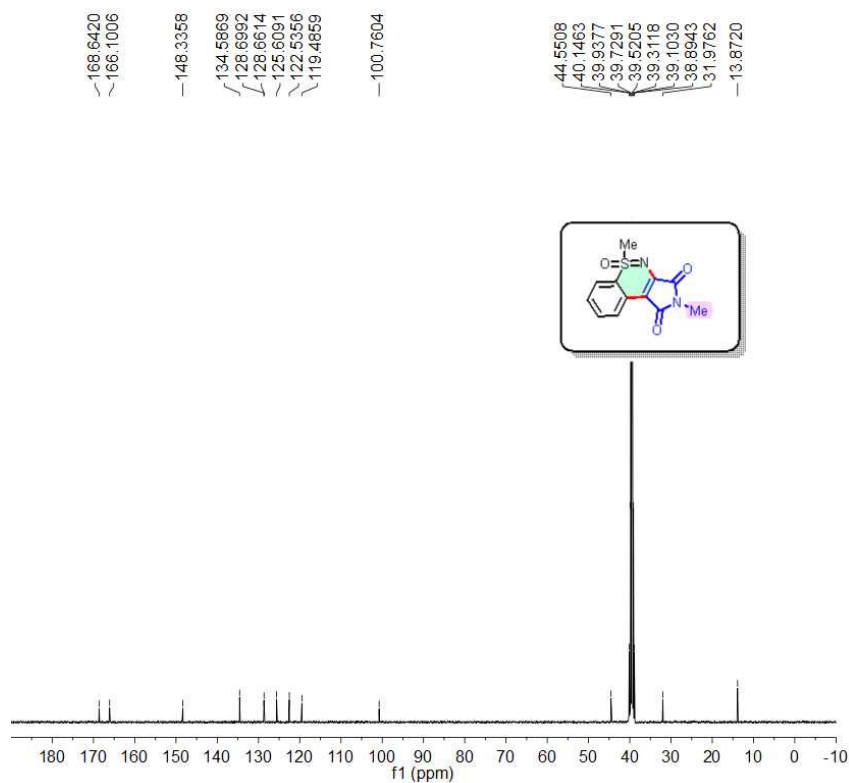

| Parameter                  | Value                                           |
|----------------------------|-------------------------------------------------|
| 1 Data File Name           | D:/ 3/ pdata/ 1/ 1r                             |
| 2 Title                    | 22-2-syj-C.3.1.1r                               |
| 3 Comment                  |                                                 |
| 4 Origin                   | Bruker BioSpin GmbH                             |
| 5 Owner                    | nmrsu                                           |
| 6 Site                     |                                                 |
| 7 Spectrometer             | Avance NEO 400                                  |
| 8 Author                   |                                                 |
| 9 Solvent                  | DMSO                                            |
| 10 Temperature             | 295.1                                           |
| 11 Pulse Sequence          | zgpg30                                          |
| 12 Experiment              | 1D                                              |
| 13 Probe                   | Z163739_0511 (PI HR-BBO400S1-BBF/ H/D-5.0-Z SP) |
| 14 Number of Scans         | 2500                                            |
| 15 Receiver Gain           | 32                                              |
| 16 Relaxation Delay        | 2.0000                                          |
| 17 Pulse Width             | 8.0000                                          |
| 18 Presaturation Frequency |                                                 |
| 19 Acquisition Time        | 1.3763                                          |
| 20 Acquisition Date        | 2022-07-10T03:55:15                             |
| 21 Modification Date       | 2022-07-10T03:55:20                             |
| 22 Class                   |                                                 |
| 23 Spectrometer Frequency  | 100.62                                          |
| 24 Spectral Width          | 23809.5                                         |
| 25 Lowest Frequency        | -1887.1                                         |
| 26 Nucleus                 | 13C                                             |
| 27 Acquired Size           | 32768                                           |
| 28 Spectral Size           | 32768                                           |

**2,5,8-Trimethyl-1*H*-5 $\lambda^4$ -benzo[*e*]pyrrolo[3,4-*c*][1,2]thiazine-1,3(2*H*)-dione 5-oxide (product 3b)**

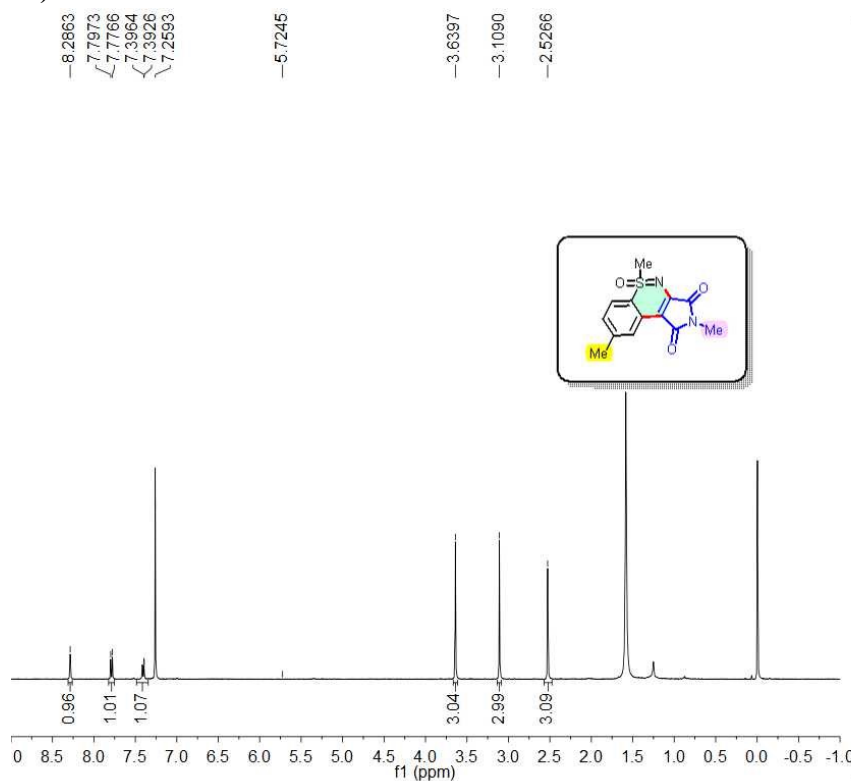

| Parameter                  | Value                                           |
|----------------------------|-------------------------------------------------|
| 1 Data File Name           | D:/117/pdata/1/1r                               |
| 2 Title                    | 22-2-syj-H.117.1.1r                             |
| 3 Comment                  |                                                 |
| 4 Origin                   | Bruker BioSpin GmbH                             |
| 5 Owner                    | nmrsu                                           |
| 6 Site                     |                                                 |
| 7 Spectrometer             | Avance NEO 400                                  |
| 8 Author                   |                                                 |
| 9 Solvent                  | CDCl3                                           |
| 10 Temperature             | 293.9                                           |
| 11 Pulse Sequence          | zg30                                            |
| 12 Experiment              | 1D                                              |
| 13 Probe                   | Z163739_0511 (PI HR-BBO400S1-BBF/ H/D-5.0-Z SP) |
| 14 Number of Scans         | 4                                               |
| 15 Receiver Gain           | 101                                             |
| 16 Relaxation Delay        | 1.0000                                          |
| 17 Pulse Width             | 8.0000                                          |
| 18 Presaturation Frequency |                                                 |
| 19 Acquisition Time        | 3.9977                                          |
| 20 Acquisition Date        | 2022-07-31T15:25:44                             |
| 21 Modification Date       | 2022-07-31T15:25:54                             |
| 22 Class                   |                                                 |
| 23 Spectrometer Frequency  | 400.15                                          |
| 24 Spectral Width          | 8196.7                                          |
| 25 Lowest Frequency        | -1637.0                                         |
| 26 Nucleus                 | 1H                                              |
| 27 Acquired Size           | 32768                                           |
| 28 Spectral Size           | 65536                                           |

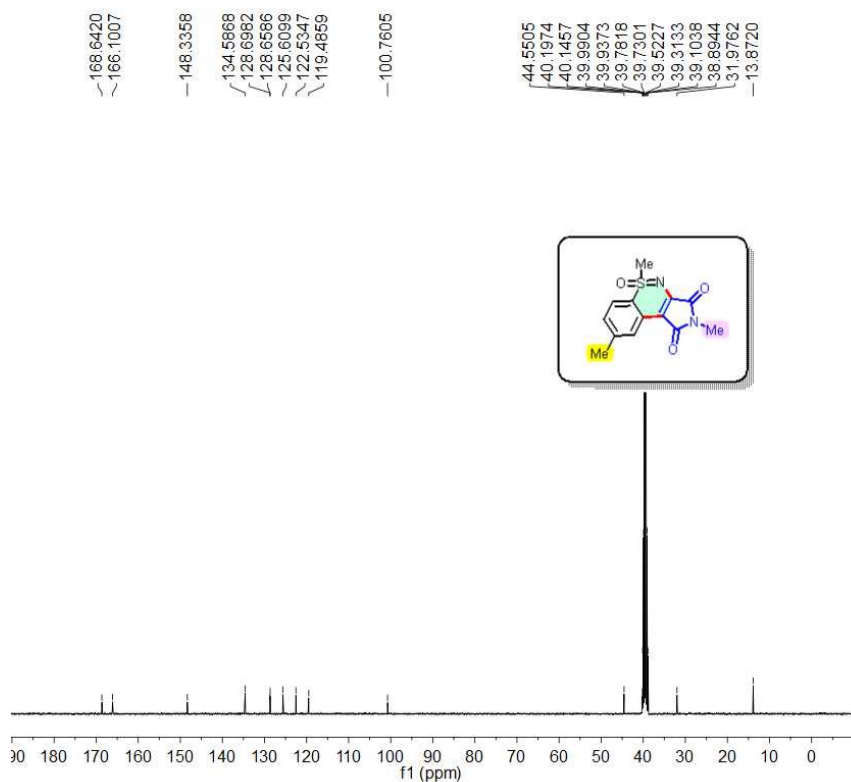

| Parameter                  | Value                                           |
|----------------------------|-------------------------------------------------|
| 1 Data File Name           | D:/3/pdata/1/1r                                 |
| 2 Title                    | 22-2-syj-C.3.1.1r                               |
| 3 Comment                  |                                                 |
| 4 Origin                   | Bruker BioSpin GmbH                             |
| 5 Owner                    | nmrsu                                           |
| 6 Site                     |                                                 |
| 7 Spectrometer             | Avance NEO 400                                  |
| 8 Author                   |                                                 |
| 9 Solvent                  | DMSO                                            |
| 10 Temperature             | 295.1                                           |
| 11 Pulse Sequence          | zpgp30                                          |
| 12 Experiment              | 1D                                              |
| 13 Probe                   | Z163739_0511 (PI HR-BBO400S1-BBF/ H/D-5.0-Z SP) |
| 14 Number of Scans         | 2500                                            |
| 15 Receiver Gain           | 32                                              |
| 16 Relaxation Delay        | 2.0000                                          |
| 17 Pulse Width             | 8.0000                                          |
| 18 Presaturation Frequency |                                                 |
| 19 Acquisition Time        | 1.3763                                          |
| 20 Acquisition Date        | 2022-07-10T03:55:15                             |
| 21 Modification Date       | 2022-07-10T03:55:20                             |
| 22 Class                   |                                                 |
| 23 Spectrometer Frequency  | 100.62                                          |
| 24 Spectral Width          | 23809.5                                         |
| 25 Lowest Frequency        | -1887.1                                         |
| 26 Nucleus                 | 13C                                             |
| 27 Acquired Size           | 32768                                           |
| 28 Spectral Size           | 32768                                           |

**8-Methoxy-2,5-dimethyl-1H-5(4-benzo[e]pyrrolo[3,4-c][1,2]thiazine-1,3(2H)-dione 5-oxide**  
**(product 3c)**

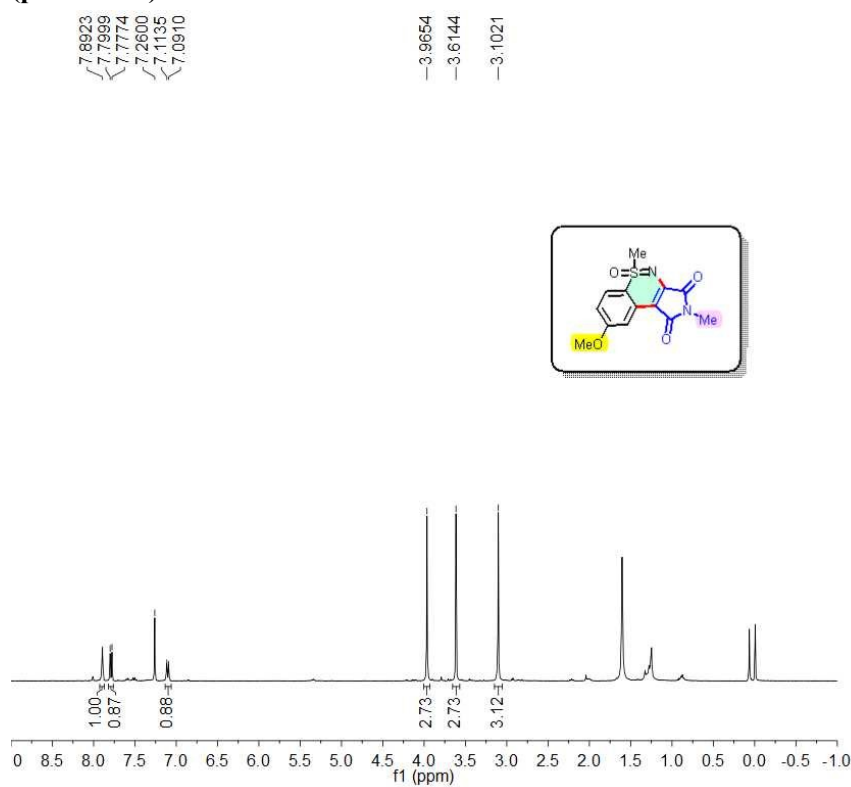

| Parameter                  | Value                                            |
|----------------------------|--------------------------------------------------|
| 1 Data File Name           | D:/ / 625/ pdata/ 1/ 1r                          |
| 2 Title                    | 22-1-syj-H.625.1.1r                              |
| 3 Comment                  |                                                  |
| 4 Origin                   | Bruker BioSpin GmbH                              |
| 5 Owner                    | nmrsu                                            |
| 6 Site                     |                                                  |
| 7 Spectrometer             | Avance NEO 400                                   |
| 8 Author                   |                                                  |
| 9 Solvent                  | CDCl3                                            |
| 10 Temperature             | 295.8                                            |
| 11 Pulse Sequence          | zg30                                             |
| 12 Experiment              | 1D                                               |
| 13 Probe                   | Z163739_0511 (PI HR-BBO400S1-BBF/ H/ D-5.0-Z SP) |
| 14 Number of Scans         | 4                                                |
| 15 Receiver Gain           | 101                                              |
| 16 Relaxation Delay        | 1.0000                                           |
| 17 Pulse Width             | 8.0000                                           |
| 18 Presaturation Frequency |                                                  |
| 19 Acquisition Time        | 3.9977                                           |
| 20 Acquisition Date        | 2022-06-25T18:39:41                              |
| 21 Modification Date       | 2022-06-25T18:39:48                              |
| 22 Class                   |                                                  |
| 23 Spectrometer Frequency  | 400.15                                           |
| 24 Spectral Width          | 8196.7                                           |
| 25 Lowest Frequency        | -1637.0                                          |
| 26 Nucleus                 | 1H                                               |
| 27 Acquired Size           | 32768                                            |
| 28 Spectral Size           | 65536                                            |

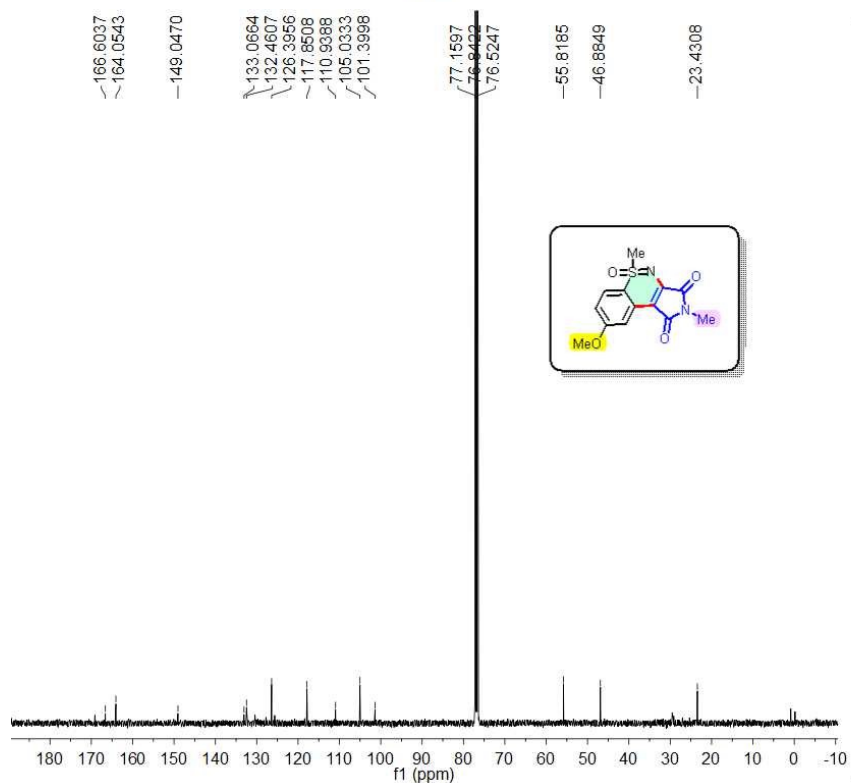

| Parameter                  | Value                                            |
|----------------------------|--------------------------------------------------|
| 1 Data File Name           | D:/ 134/ pdata/ 1/ 1r                            |
| 2 Title                    | 22-1-syj-C.134.1.1r                              |
| 3 Comment                  |                                                  |
| 4 Origin                   | Bruker BioSpin GmbH                              |
| 5 Owner                    | nmrsu                                            |
| 6 Site                     |                                                  |
| 7 Spectrometer             | Avance NEO 400                                   |
| 8 Author                   |                                                  |
| 9 Solvent                  | CDCl3                                            |
| 10 Temperature             | 296.5                                            |
| 11 Pulse Sequence          | zgpg30                                           |
| 12 Experiment              | 1D                                               |
| 13 Probe                   | Z163739_0511 (PI HR-BBO400S1-BBF/ H/ D-5.0-Z SP) |
| 14 Number of Scans         | 1500                                             |
| 15 Receiver Gain           | 15                                               |
| 16 Relaxation Delay        | 2.0000                                           |
| 17 Pulse Width             | 8.0000                                           |
| 18 Presaturation Frequency |                                                  |
| 19 Acquisition Time        | 1.3763                                           |
| 20 Acquisition Date        | 2022-06-26T14:42:22                              |
| 21 Modification Date       | 2022-06-26T14:42:28                              |
| 22 Class                   |                                                  |
| 23 Spectrometer Frequency  | 100.62                                           |
| 24 Spectral Width          | 23809.5                                          |
| 25 Lowest Frequency        | -1861.9                                          |
| 26 Nucleus                 | 13C                                              |
| 27 Acquired Size           | 32768                                            |
| 28 Spectral Size           | 32768                                            |

**8-Chloro-2,5-dimethyl-1*H*-5λ<sup>4</sup>-benzo[*e*]pyrrolo[3,4-*c*][1,2]thiazine-1,3(2*H*)-dione 5-oxide**  
**(product 3d)**

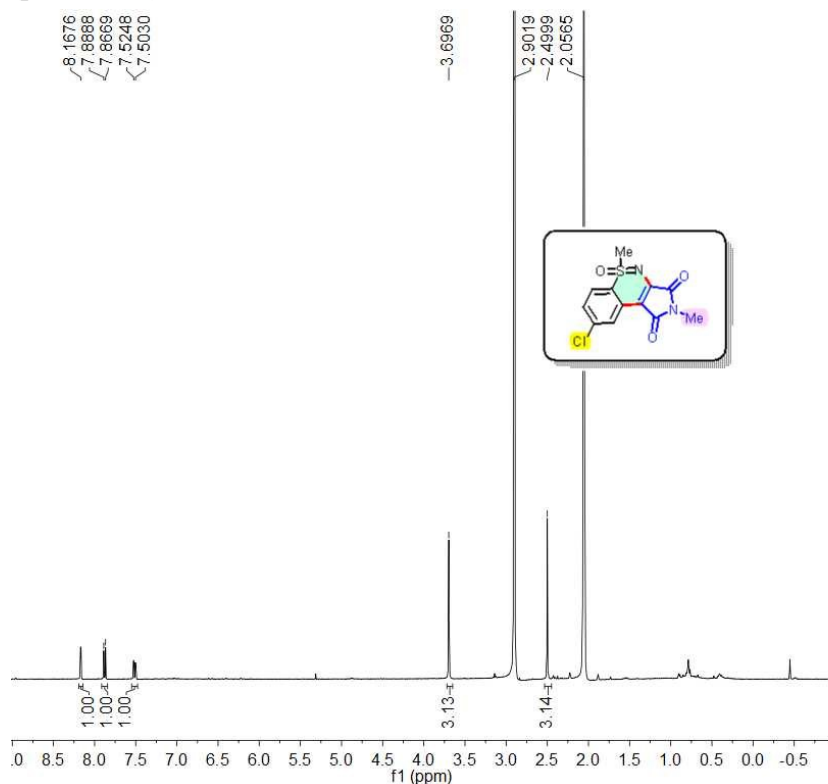

| Parameter                  | Value                                                   |
|----------------------------|---------------------------------------------------------|
| 1 Data File Name           | D:/ 675/ pdata/ 1/ 1r                                   |
| 2 Title                    | 22-1-syj-H.675.1.1r                                     |
| 3 Comment                  |                                                         |
| 4 Origin                   | Bruker BioSpin GmbH                                     |
| 5 Owner                    | nmrsu                                                   |
| 6 Site                     |                                                         |
| 7 Spectrometer             | Avance NEO 400                                          |
| 8 Author                   |                                                         |
| 9 Solvent                  | DMSO                                                    |
| 10 Temperature             | 294.8                                                   |
| 11 Pulse Sequence          | zg30                                                    |
| 12 Experiment              | 1D                                                      |
| 13 Probe                   | Z163739_0511 (PI HR-<br>BB0400S1-BBF/ H/<br>D-5.0-Z SP) |
| 14 Number of Scans         | 4                                                       |
| 15 Receiver Gain           | 101                                                     |
| 16 Relaxation Delay        | 1.0000                                                  |
| 17 Pulse Width             | 8.0000                                                  |
| 18 Presaturation Frequency |                                                         |
| 19 Acquisition Time        | 3.9977                                                  |
| 20 Acquisition Date        | 2022-07-08T21:12:44                                     |
| 21 Modification Date       | 2022-07-08T21:12:48                                     |
| 22 Class                   |                                                         |
| 23 Spectrometer Frequency  | 400.15                                                  |
| 24 Spectral Width          | 8196.7                                                  |
| 25 Lowest Frequency        | -1807.9                                                 |
| 26 Nucleus                 | 1H                                                      |
| 27 Acquired Size           | 32768                                                   |
| 28 Spectral Size           | 65536                                                   |

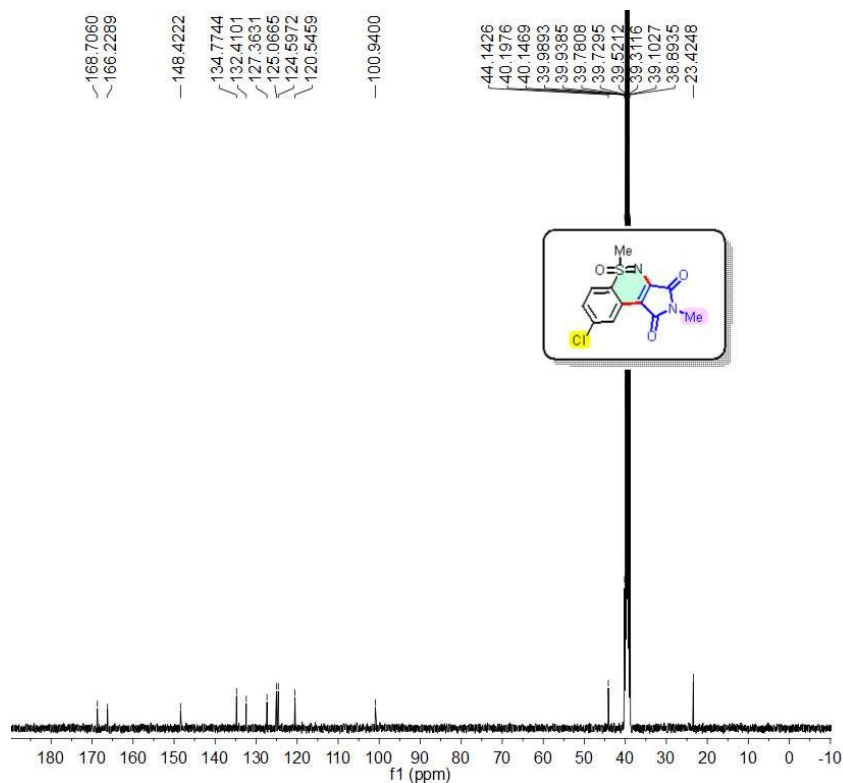

| Parameter                  | Value                                                   |
|----------------------------|---------------------------------------------------------|
| 1 Data File Name           | D:/ 2/ pdata/ 1/ 1r                                     |
| 2 Title                    | 22-2-syj-C.2.1.1r                                       |
| 3 Comment                  |                                                         |
| 4 Origin                   | Bruker BioSpin GmbH                                     |
| 5 Owner                    | nmrsu                                                   |
| 6 Site                     |                                                         |
| 7 Spectrometer             | Avance NEO 400                                          |
| 8 Author                   |                                                         |
| 9 Solvent                  | DMSO                                                    |
| 10 Temperature             | 295.3                                                   |
| 11 Pulse Sequence          | zgpg30                                                  |
| 12 Experiment              | 1D                                                      |
| 13 Probe                   | Z163739_0511 (PI HR-<br>BB0400S1-BBF/ H/<br>D-5.0-Z SP) |
| 14 Number of Scans         | 3000                                                    |
| 15 Receiver Gain           | 15                                                      |
| 16 Relaxation Delay        | 2.0000                                                  |
| 17 Pulse Width             | 8.0000                                                  |
| 18 Presaturation Frequency |                                                         |
| 19 Acquisition Time        | 1.3763                                                  |
| 20 Acquisition Date        | 2022-07-10T01:27:51                                     |
| 21 Modification Date       | 2022-07-10T01:27:56                                     |
| 22 Class                   |                                                         |
| 23 Spectrometer Frequency  | 100.62                                                  |
| 24 Spectral Width          | 23809.5                                                 |
| 25 Lowest Frequency        | -1888.0                                                 |
| 26 Nucleus                 | 13C                                                     |
| 27 Acquired Size           | 32768                                                   |
| 28 Spectral Size           | 32768                                                   |

**6-Chloro-2,5-dimethyl-1*H*-5λ<sup>4</sup>-benzo[e]pyrrolo[3,4-*c*][1,2]thiazine-1,3(2*H*)-dione 5-oxide**  
**(product 3e)**

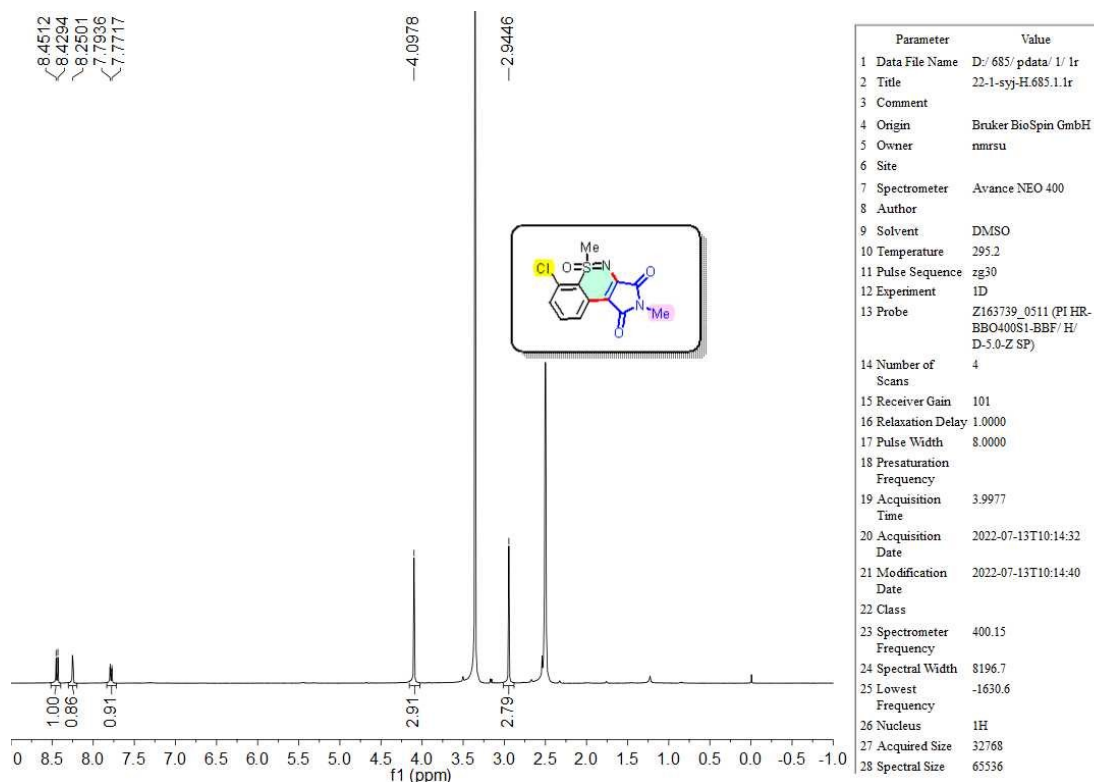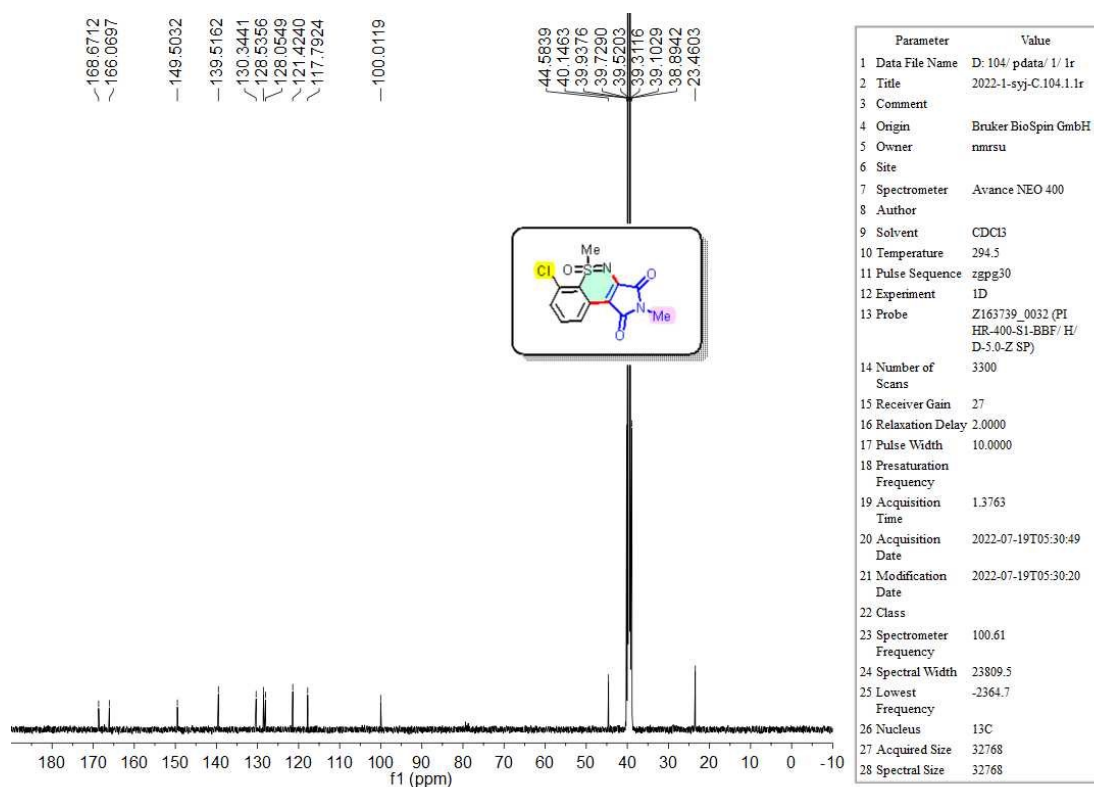

2-Ethyl-5-methyl-1*H*-5λ<sup>4</sup>-benzo[e]pyrrolo[3,4-*c*][1,2]thiazine-1,3(2*H*)-dione 5-oxide (product 3f)

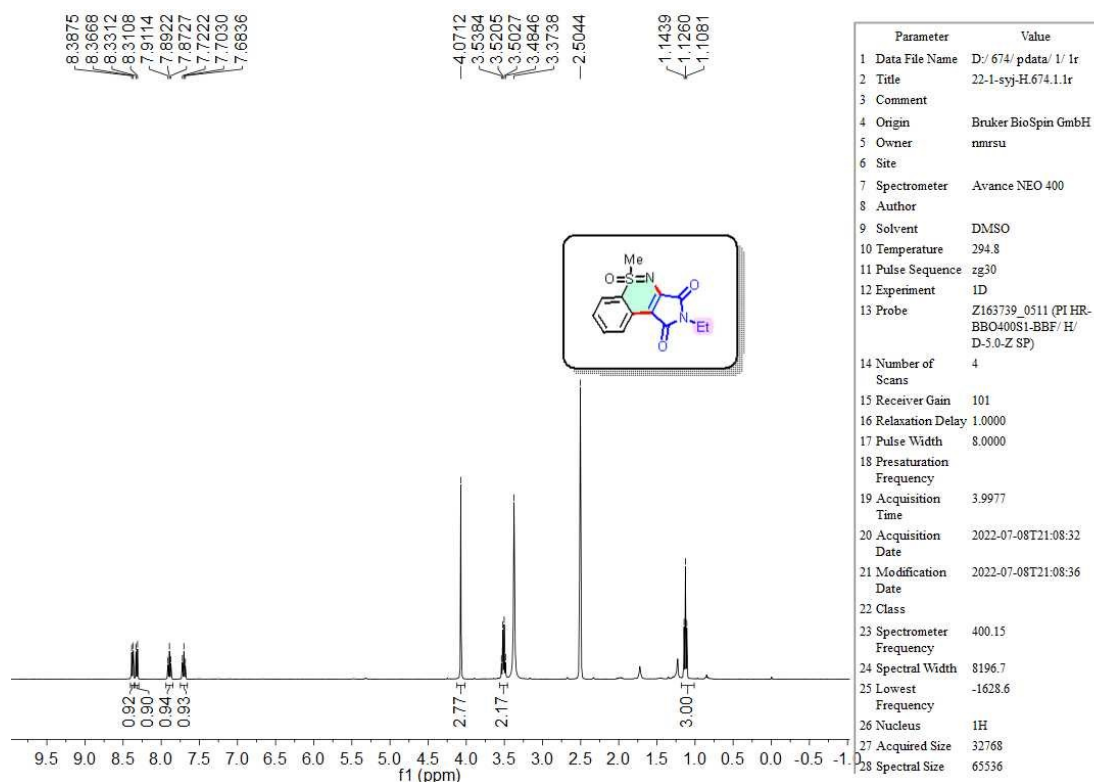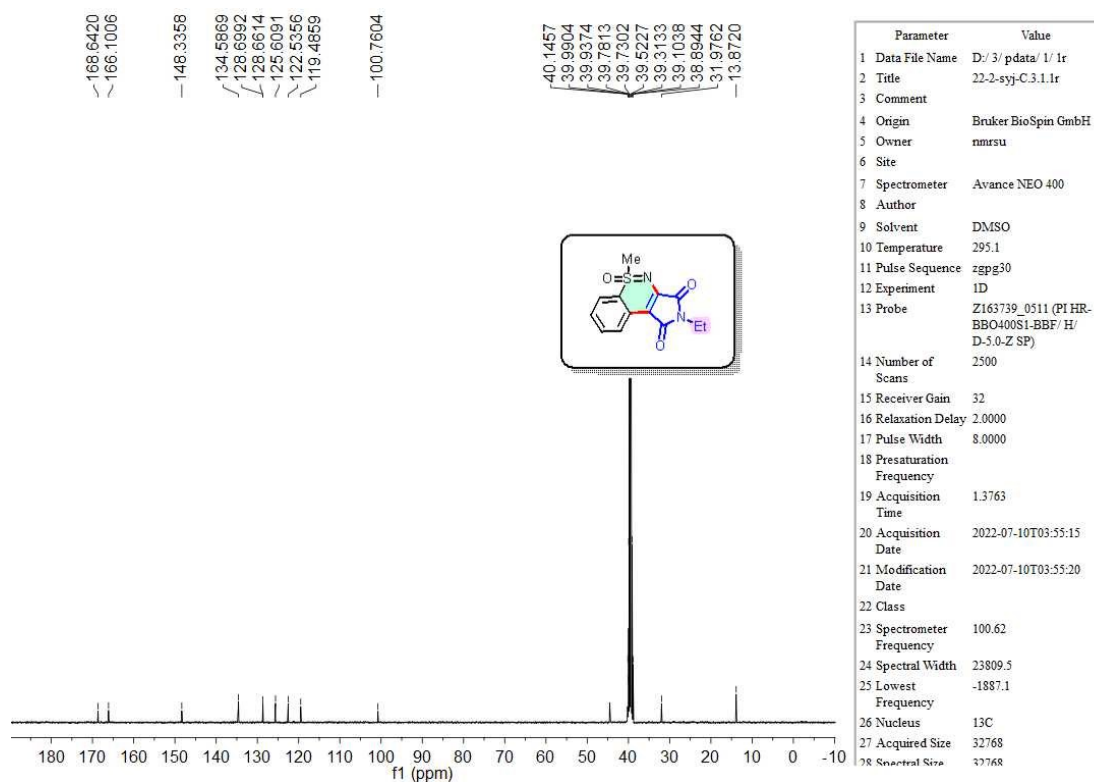



**2-Ethyl-5,8-dimethyl-1*H*-5λ<sup>4</sup>-benzo[*e*]pyrrolo[3,4-*c*][1,2]thiazine-1,3(2*H*)-dione 5-oxide**  
**(product 3g)**

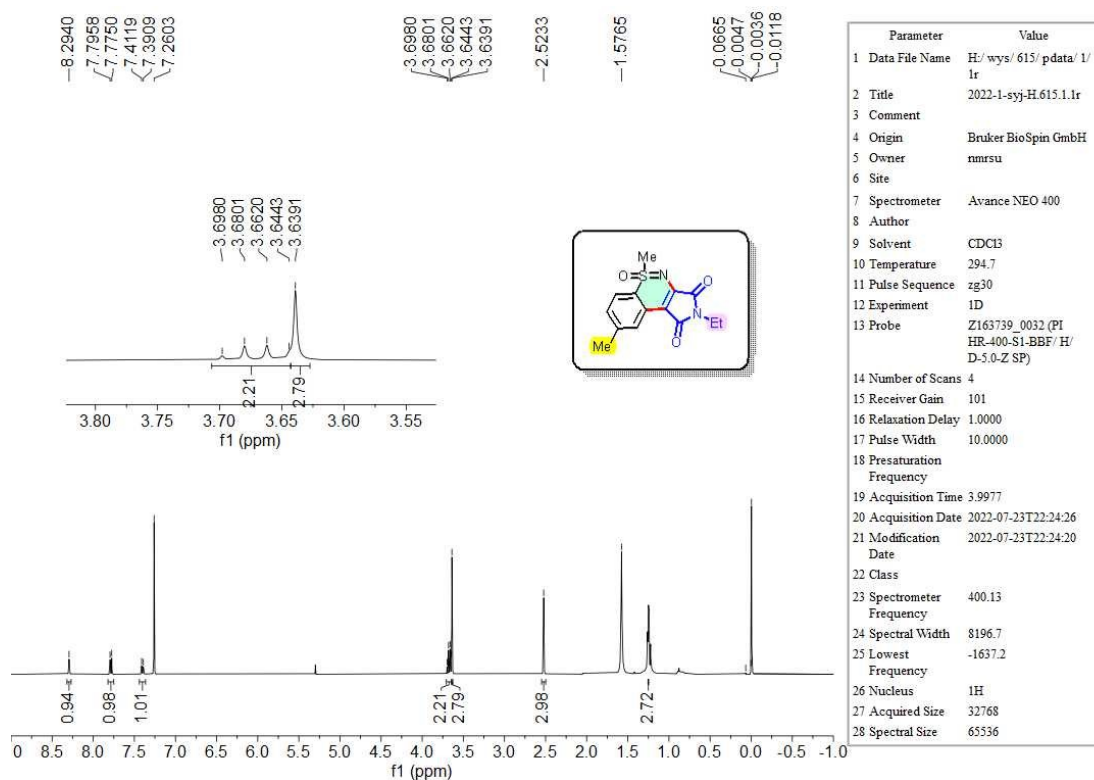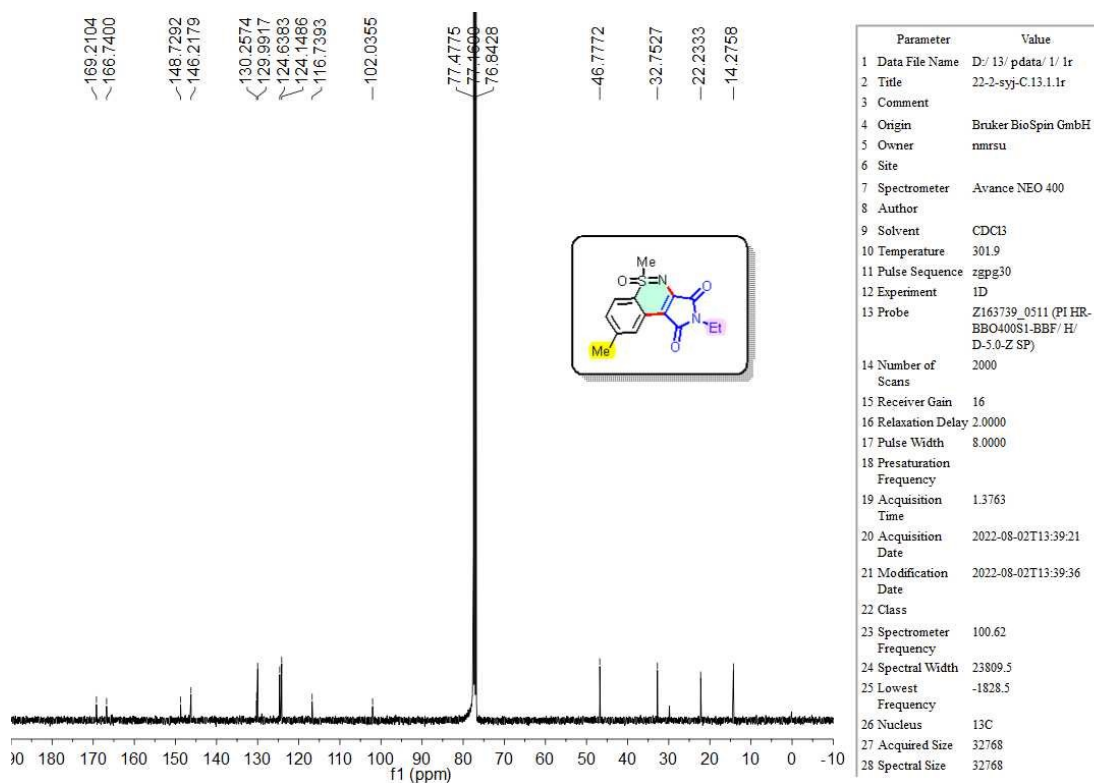

**2-Ethyl-8-methoxy-5-methyl-1*H*-5λ<sup>4</sup>-benzo[*e*]pyrrolo[3,4-*c*][1,2]thiazine-1,3(2*H*)-dione 5-oxide (product 3h)**

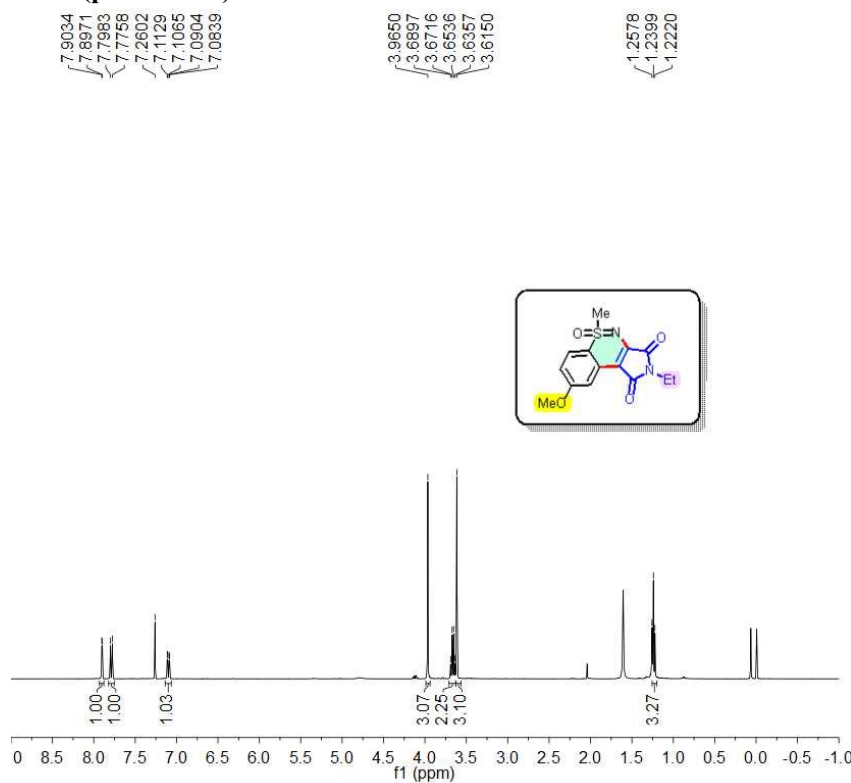

| Parameter                  | Value                                           |
|----------------------------|-------------------------------------------------|
| 1 Data File Name           | D:/ 626 /pdata/ 1/ 1r                           |
| 2 Title                    | 22-1-syj-H.626.1.1r                             |
| 3 Comment                  |                                                 |
| 4 Origin                   | Bruker BioSpin GmbH                             |
| 5 Owner                    | nmrsu                                           |
| 6 Site                     |                                                 |
| 7 Spectrometer             | Avance NEO 400                                  |
| 8 Author                   |                                                 |
| 9 Solvent                  | CDCl3                                           |
| 10 Temperature             | 295.3                                           |
| 11 Pulse Sequence          | zg30                                            |
| 12 Experiment              | 1D                                              |
| 13 Probe                   | Z163739_0511 (PI HR-BBO400S1-BBF/ H/D-5.0-Z SP) |
| 14 Number of Scans         | 4                                               |
| 15 Receiver Gain           | 101                                             |
| 16 Relaxation Delay        | 1.0000                                          |
| 17 Pulse Width             | 8.0000                                          |
| 18 Presaturation Frequency |                                                 |
| 19 Acquisition Time        | 3.9977                                          |
| 20 Acquisition Date        | 2022-06-25T18:44:53                             |
| 21 Modification Date       | 2022-06-25T18:44:58                             |
| 22 Class                   |                                                 |
| 23 Spectrometer Frequency  | 400.15                                          |
| 24 Spectral Width          | 8196.7                                          |
| 25 Lowest Frequency        | -1637.0                                         |
| 26 Nucleus                 | 1H                                              |
| 27 Acquired Size           | 32768                                           |
| 28 Spectral Size           | 65536                                           |

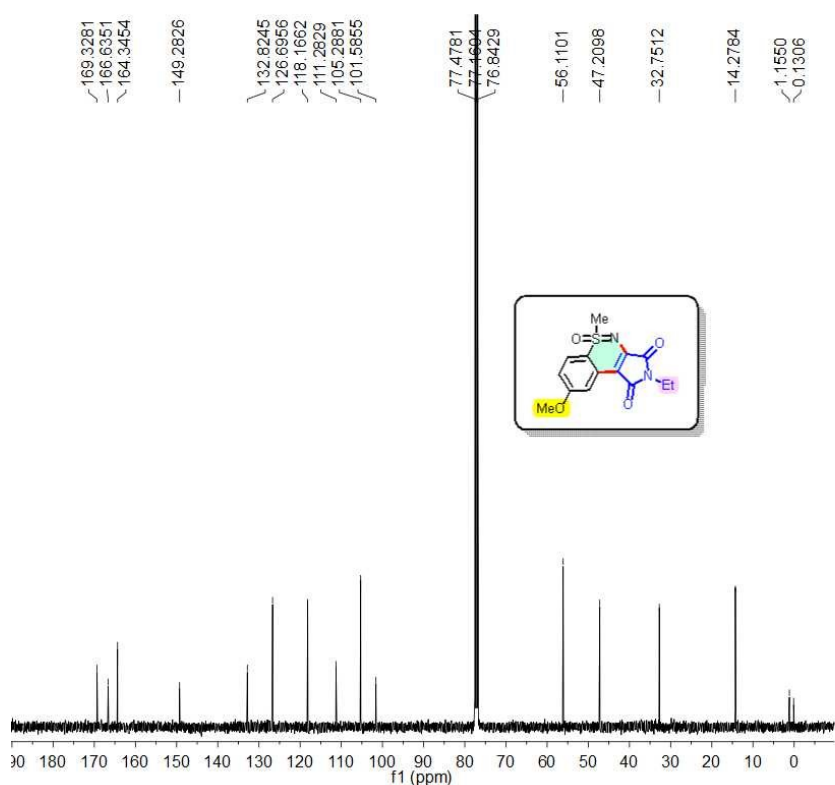

| Parameter                  | Value                                           |
|----------------------------|-------------------------------------------------|
| 1 Data File Name           | D:/ 132 /pdata/ 1/ 1r                           |
| 2 Title                    | 22-1-syj-C.132.1.1r                             |
| 3 Comment                  |                                                 |
| 4 Origin                   | Bruker BioSpin GmbH                             |
| 5 Owner                    | nmrsu                                           |
| 6 Site                     |                                                 |
| 7 Spectrometer             | Avance NEO 400                                  |
| 8 Author                   |                                                 |
| 9 Solvent                  | CDCl3                                           |
| 10 Temperature             | 296.5                                           |
| 11 Pulse Sequence          | zpgp30                                          |
| 12 Experiment              | 1D                                              |
| 13 Probe                   | Z163739_0511 (PI HR-BBO400S1-BBF/ H/D-5.0-Z SP) |
| 14 Number of Scans         | 1200                                            |
| 15 Receiver Gain           | 15                                              |
| 16 Relaxation Delay        | 2.0000                                          |
| 17 Pulse Width             | 8.0000                                          |
| 18 Presaturation Frequency |                                                 |
| 19 Acquisition Time        | 1.3763                                          |
| 20 Acquisition Date        | 2022-06-25T21:31:24                             |
| 21 Modification Date       | 2022-06-25T21:31:30                             |
| 22 Class                   |                                                 |
| 23 Spectrometer Frequency  | 100.62                                          |
| 24 Spectral Width          | 23809.3                                         |
| 25 Lowest Frequency        | -1830.4                                         |
| 26 Nucleus                 | 13C                                             |
| 27 Acquired Size           | 32768                                           |
| 28 Spectral Size           | 32768                                           |

**8-Chloro-2-ethyl-5-methyl-1H-5(4-benzo[e]pyrrolo[3,4-c][1,2]thiazine-1,3(2H)-dione 5-oxide**  
(product 3i)

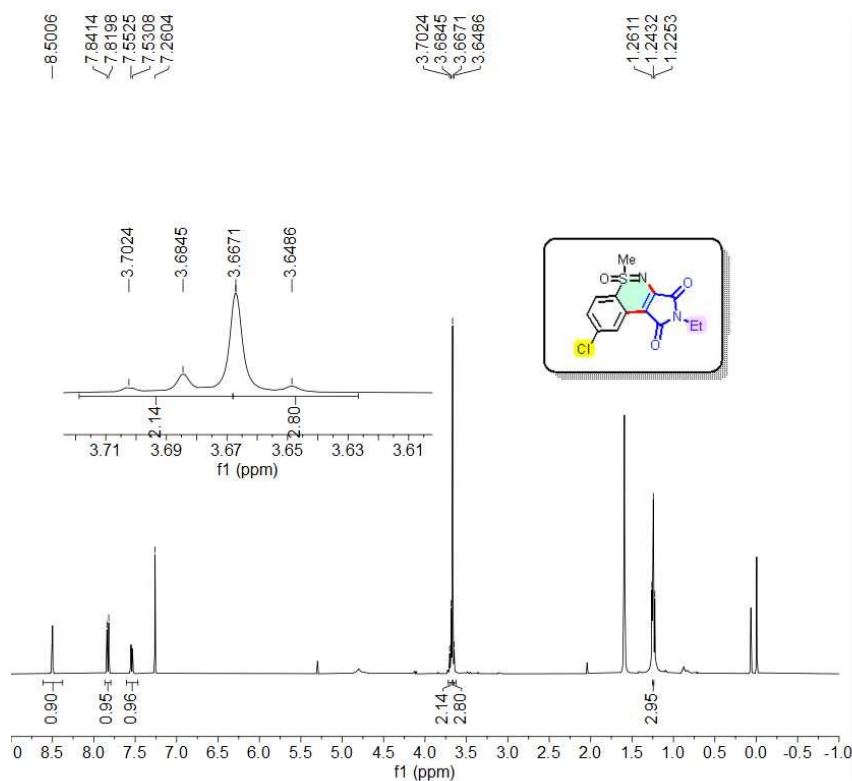

| Parameter                  | Value                                           |
|----------------------------|-------------------------------------------------|
| 1 Data File Name           | D:/642/pdata/1/ 1r                              |
| 2 Title                    | 22-1-syj-H.642.1.1r                             |
| 3 Comment                  |                                                 |
| 4 Origin                   | Bruker BioSpin GmbH                             |
| 5 Owner                    | nmrsu                                           |
| 6 Site                     |                                                 |
| 7 Spectrometer             | Avance NEO 400                                  |
| 8 Author                   |                                                 |
| 9 Solvent                  | CDCl3                                           |
| 10 Temperature             | 295.1                                           |
| 11 Pulse Sequence          | zg30                                            |
| 12 Experiment              | 1D                                              |
| 13 Probe                   | Z163739_0511 (PI HR-BBO400S1-BBF/ H/D-5.0-Z SP) |
| 14 Number of Scans         | 4                                               |
| 15 Receiver Gain           | 101                                             |
| 16 Relaxation Delay        | 1.0000                                          |
| 17 Pulse Width             | 8.0000                                          |
| 18 Presaturation Frequency |                                                 |
| 19 Acquisition Time        | 3.9977                                          |
| 20 Acquisition Date        | 2022-06-29T11:17:12                             |
| 21 Modification Date       | 2022-06-29T11:17:20                             |
| 22 Class                   |                                                 |
| 23 Spectrometer Frequency  | 400.15                                          |
| 24 Spectral Width          | 8196.7                                          |
| 25 Lowest Frequency        | -1637.0                                         |
| 26 Nucleus                 | 1H                                              |
| 27 Acquired Size           | 32768                                           |
| 28 Spectral Size           | 65536                                           |

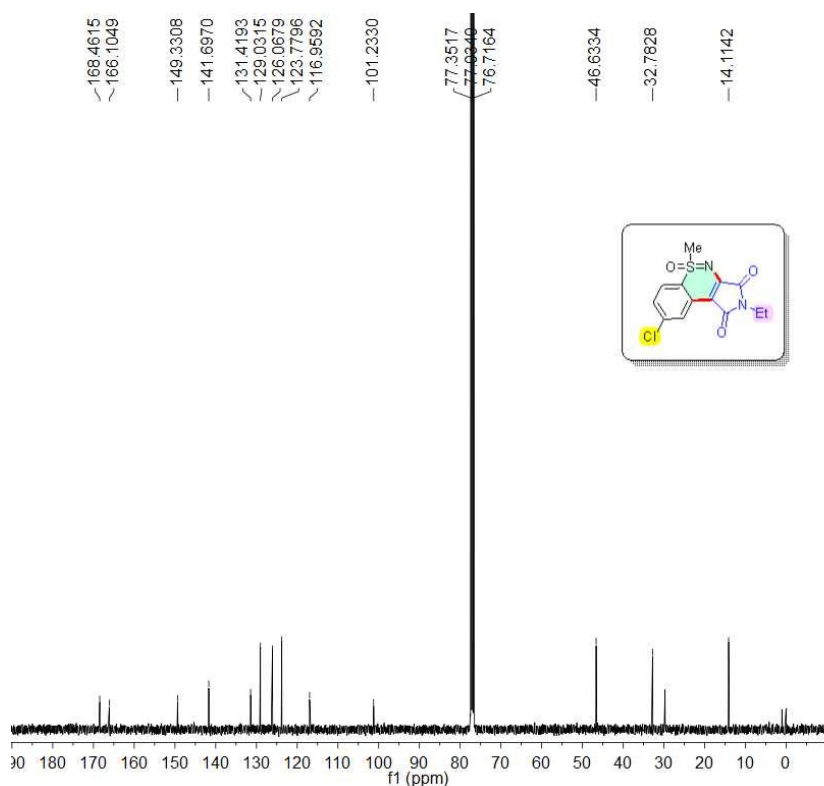

| Parameter                  | Value                                           |
|----------------------------|-------------------------------------------------|
| 1 Data File Name           | D:/ 142/pdata/1/ 1r                             |
| 2 Title                    | 22-1-syj-C.142.1.1r                             |
| 3 Comment                  |                                                 |
| 4 Origin                   | Bruker BioSpin GmbH                             |
| 5 Owner                    | nmrsu                                           |
| 6 Site                     |                                                 |
| 7 Spectrometer             | Avance NEO 400                                  |
| 8 Author                   |                                                 |
| 9 Solvent                  | CDCl3                                           |
| 10 Temperature             | 296.1                                           |
| 11 Pulse Sequence          | zgpg30                                          |
| 12 Experiment              | 1D                                              |
| 13 Probe                   | Z163739_0511 (PI HR-BBO400S1-BBF/ H/D-5.0-Z SP) |
| 14 Number of Scans         | 1500                                            |
| 15 Receiver Gain           | 15                                              |
| 16 Relaxation Delay        | 2.0000                                          |
| 17 Pulse Width             | 8.0000                                          |
| 18 Presaturation Frequency |                                                 |
| 19 Acquisition Time        | 1.3763                                          |
| 20 Acquisition Date        | 2022-06-29T13:04:53                             |
| 21 Modification Date       | 2022-06-29T13:05:02                             |
| 22 Class                   |                                                 |
| 23 Spectrometer Frequency  | 100.62                                          |
| 24 Spectral Width          | 23809.5                                         |
| 25 Lowest Frequency        | -1843.0                                         |
| 26 Nucleus                 | 13C                                             |
| 27 Acquired Size           | 32768                                           |
| 28 Spectral Size           | 32768                                           |

**8-Bromo-2-ethyl-5-methyl-1*H*-5λ<sup>4</sup>-benzo[*e*]pyrrolo[3,4-*c*][1,2]thiazine-1,3(2*H*)-dione 5-oxide**  
**(product 3j)**

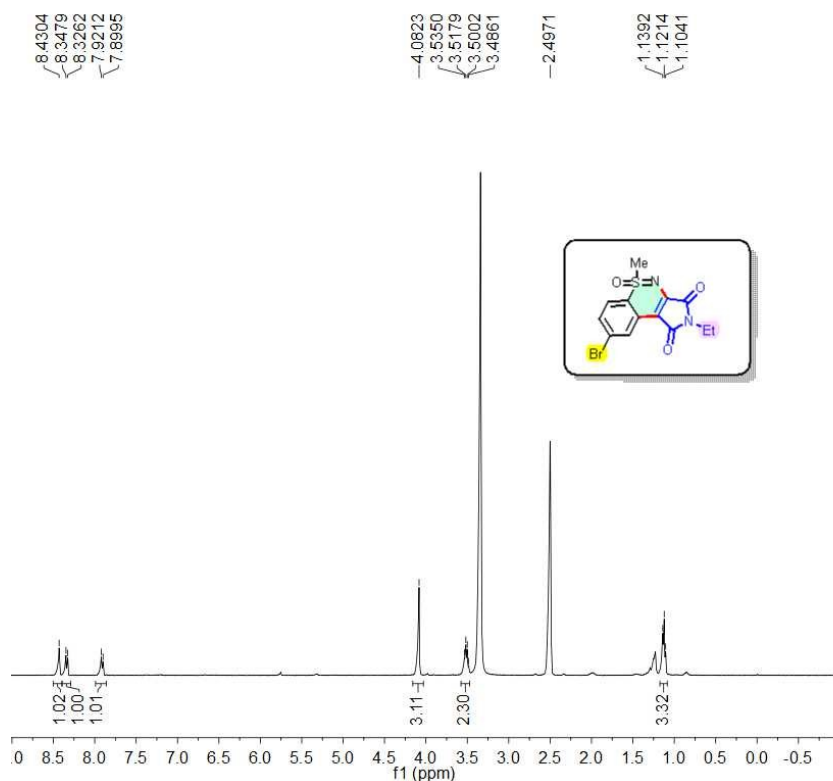

| Parameter                  | Value                                                |
|----------------------------|------------------------------------------------------|
| 1 Data File Name           | H:/ 599/ pdata/ 1/ 1r                                |
| 2 Title                    | 2023-2-syj-H.599.1.1r                                |
| 3 Comment                  |                                                      |
| 4 Origin                   | Bruker BioSpin GmbH                                  |
| 5 Owner                    | nmsu                                                 |
| 6 Site                     |                                                      |
| 7 Spectrometer             | Avance NEO 400                                       |
| 8 Author                   |                                                      |
| 9 Solvent                  | DMSO                                                 |
| 10 Temperature             | 295.3                                                |
| 11 Pulse Sequence          | zg30                                                 |
| 12 Experiment              | 1D                                                   |
| 13 Probe                   | Z163739_0032 (PI<br>HR-400-S1-BBF/ H/<br>D-5.0-Z SP) |
| 14 Number of Scans         | 4                                                    |
| 15 Receiver Gain           | 101                                                  |
| 16 Relaxation Delay        | 1.0000                                               |
| 17 Pulse Width             | 10.0000                                              |
| 18 Presaturation Frequency |                                                      |
| 19 Acquisition Time        | 3.9977                                               |
| 20 Acquisition Date        | 2023-11-13T22:02:17                                  |
| 21 Modification Date       | 2023-11-13T22:01:32                                  |
| 22 Class                   |                                                      |
| 23 Spectrometer Frequency  | 400.13                                               |
| 24 Spectral Width          | 8196.7                                               |
| 25 Lowest Frequency        | -1630.4                                              |
| 26 Nucleus                 | <sup>1</sup> H                                       |
| 27 Acquired Size           | 32768                                                |
| 28 Spectral Size           | 65536                                                |

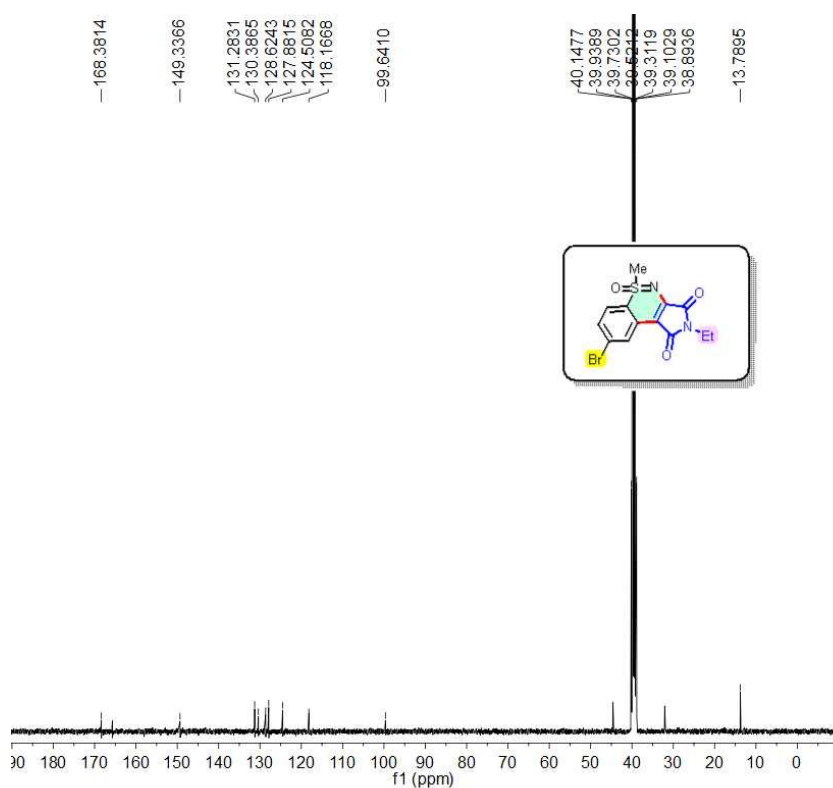

| Parameter                  | Value                                                |
|----------------------------|------------------------------------------------------|
| 1 Data File Name           | H:/ 95/ pdata/ 1/ 1r                                 |
| 2 Title                    | 2023-2-syj-C.95.1.1r                                 |
| 3 Comment                  |                                                      |
| 4 Origin                   | Bruker BioSpin GmbH                                  |
| 5 Owner                    | nmsu                                                 |
| 6 Site                     |                                                      |
| 7 Spectrometer             | Avance NEO 400                                       |
| 8 Author                   |                                                      |
| 9 Solvent                  | DMSO-D6                                              |
| 10 Temperature             | 296.1                                                |
| 11 Pulse Sequence          | zgpg30                                               |
| 12 Experiment              | 1D                                                   |
| 13 Probe                   | Z163739_0032 (PI<br>HR-400-S1-BBF/ H/<br>D-5.0-Z SP) |
| 14 Number of Scans         | 2000                                                 |
| 15 Receiver Gain           | 13                                                   |
| 16 Relaxation Delay        | 2.0000                                               |
| 17 Pulse Width             | 10.0000                                              |
| 18 Presaturation Frequency |                                                      |
| 19 Acquisition Time        | 1.3763                                               |
| 20 Acquisition Date        | 2023-11-14T01:20:29                                  |
| 21 Modification Date       | 2023-11-14T01:19:42                                  |
| 22 Class                   |                                                      |
| 23 Spectrometer Frequency  | 100.61                                               |
| 24 Spectral Width          | 23809.5                                              |
| 25 Lowest Frequency        | -1889.6                                              |
| 26 Nucleus                 | <sup>13</sup> C                                      |
| 27 Acquired Size           | 32768                                                |
| 28 Spectral Size           | 32768                                                |

**6-Chloro-2-ethyl-5-methyl-1*H*-5λ<sup>4</sup>-benzo[e]pyrrolo[3,4-*c*][1,2]thiazine-1,3(2*H*)-dione 5-oxide**  
**(product 3k)**

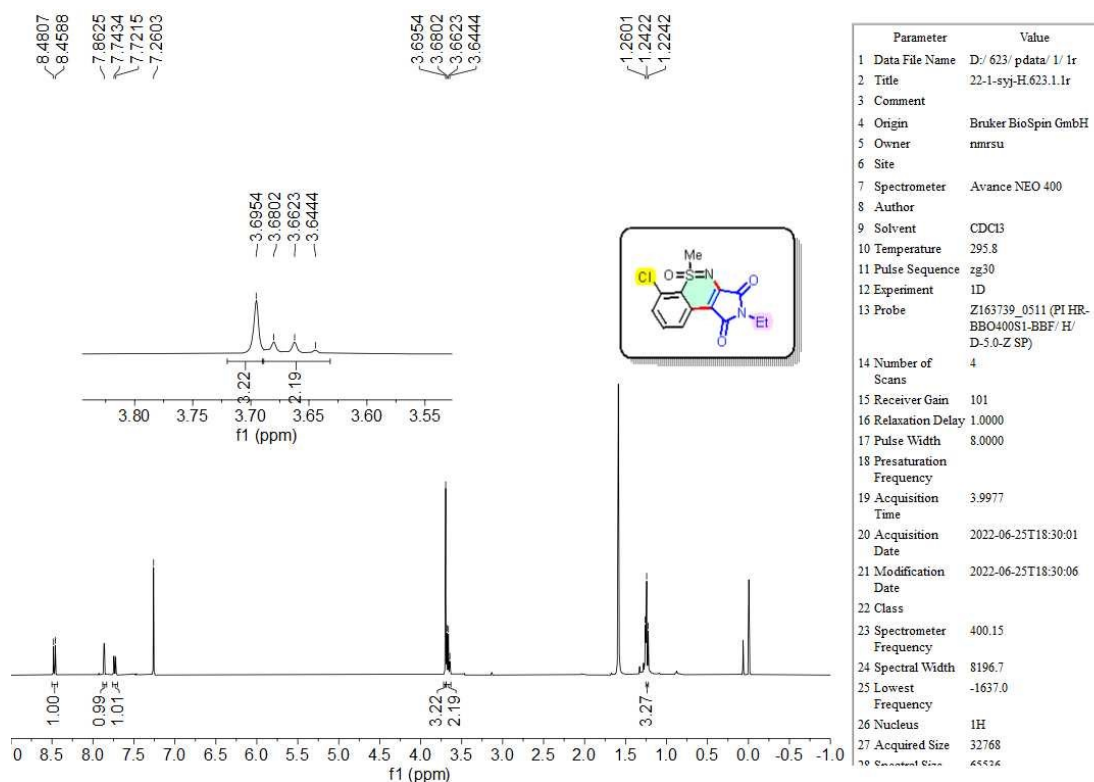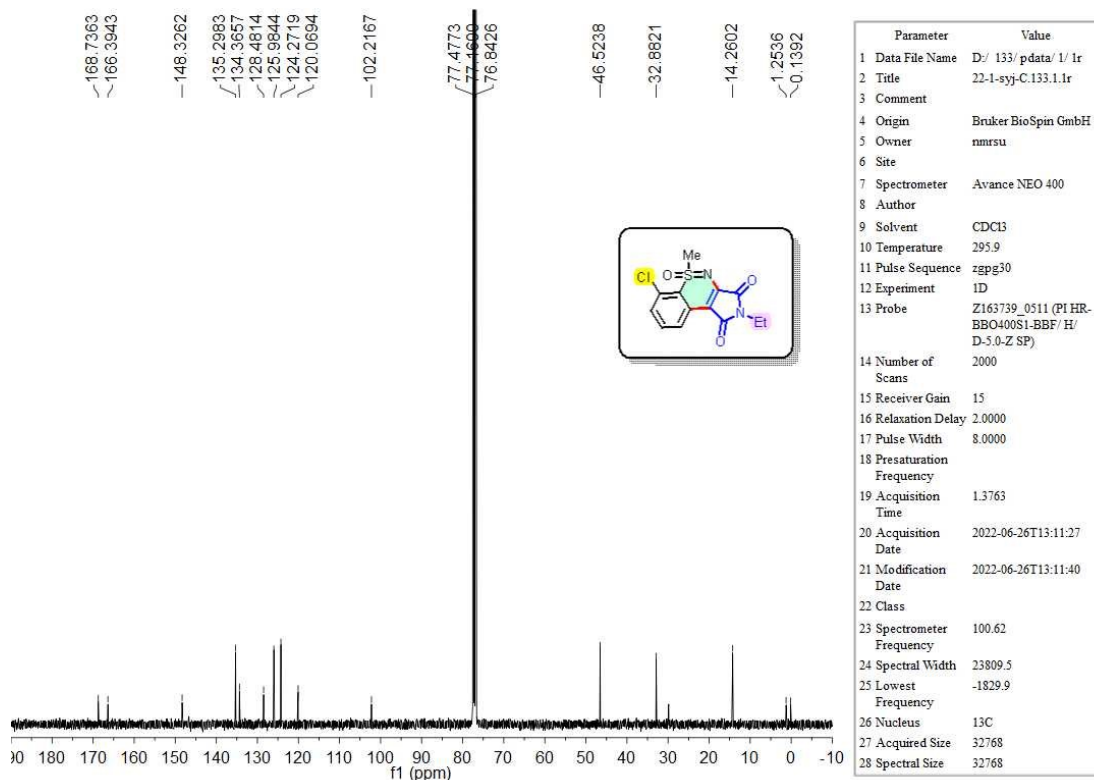

**8-(*tert*-Butyl)-2-ethyl-5-methyl-1*H*-5λ<sup>4</sup>-benzo[*e*]pyrrolo[3,4-*c*][1,2]thiazine-1,3(2*H*)-dione 5-oxide (product 3l)**

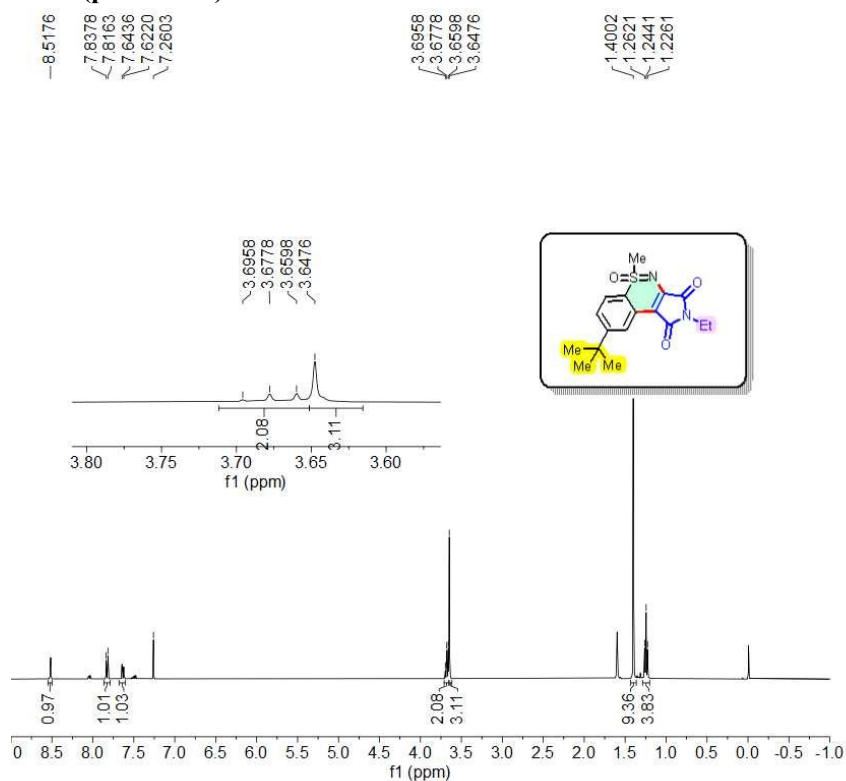

| Parameter                  | Value                                          |
|----------------------------|------------------------------------------------|
| 1 Data File Name           | D:/580/pdata/1/1r                              |
| 2 Title                    | 2022-1-syj-H.580.1.1r                          |
| 3 Comment                  |                                                |
| 4 Origin                   | Bruker BioSpin GmbH                            |
| 5 Owner                    | nmrsu                                          |
| 6 Site                     |                                                |
| 7 Spectrometer             | Avance NEO 400                                 |
| 8 Author                   |                                                |
| 9 Solvent                  | CDCl3                                          |
| 10 Temperature             | 295.9                                          |
| 11 Pulse Sequence          | zg30                                           |
| 12 Experiment              | 1D                                             |
| 13 Probe                   | Z163739_0032 (PI HR-400-S1-BBF/ H/ D-5.0-Z SP) |
| 14 Number of Scans         | 4                                              |
| 15 Receiver Gain           | 101                                            |
| 16 Relaxation Delay        | 1.0000                                         |
| 17 Pulse Width             | 10.0000                                        |
| 18 Presaturation Frequency |                                                |
| 19 Acquisition Time        | 3.9977                                         |
| 20 Acquisition Date        | 2022-07-15T11:50:52                            |
| 21 Modification Date       | 2022-07-15T11:50:44                            |
| 22 Class                   |                                                |
| 23 Spectrometer Frequency  | 400.13                                         |
| 24 Spectral Width          | 8196.7                                         |
| 25 Lowest Frequency        | -1637.2                                        |
| 26 Nucleus                 | 1H                                             |
| 27 Acquired Size           | 32768                                          |
| 28 Spectral Size           | 65536                                          |

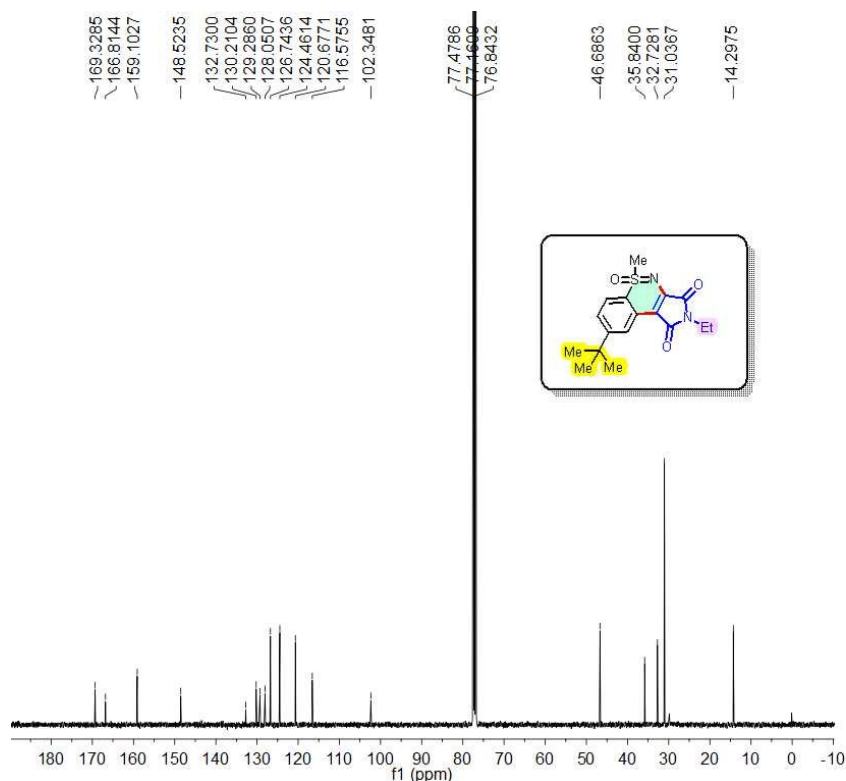

| Parameter                  | Value                                            |
|----------------------------|--------------------------------------------------|
| 1 Data File Name           | D:/176/pdata/1/1r                                |
| 2 Title                    | 22-1-syj-C.176.1.1r                              |
| 3 Comment                  |                                                  |
| 4 Origin                   | Bruker BioSpin GmbH                              |
| 5 Owner                    | nmrsu                                            |
| 6 Site                     |                                                  |
| 7 Spectrometer             | Avance NEO 400                                   |
| 8 Author                   |                                                  |
| 9 Solvent                  | CDCl3                                            |
| 10 Temperature             | 294.7                                            |
| 11 Pulse Sequence          | zgpg30                                           |
| 12 Experiment              | 1D                                               |
| 13 Probe                   | Z163739_0511 (PI HR-BBO400S1-BBF/ H/ D-5.0-Z SP) |
| 14 Number of Scans         | 2200                                             |
| 15 Receiver Gain           | 15                                               |
| 16 Relaxation Delay        | 2.0000                                           |
| 17 Pulse Width             | 8.0000                                           |
| 18 Presaturation Frequency |                                                  |
| 19 Acquisition Time        | 1.3763                                           |
| 20 Acquisition Date        | 2022-07-20T01:35:15                              |
| 21 Modification Date       | 2022-07-20T01:35:28                              |
| 22 Class                   |                                                  |
| 23 Spectrometer Frequency  | 100.62                                           |
| 24 Spectral Width          | 23809.5                                          |
| 25 Lowest Frequency        | -1831.1                                          |
| 26 Nucleus                 | 13C                                              |
| 27 Acquired Size           | 32768                                            |
| 28 Spectral Size           | 32768                                            |

**2-(*tert*-Butyl)-5,8-dimethyl-1*H*-5λ<sup>4</sup>-benzo[e]pyrrolo[3,4-*c*][1,2]thiazine-1,3(2*H*)-dione 5-oxide**  
**(product 3m)**

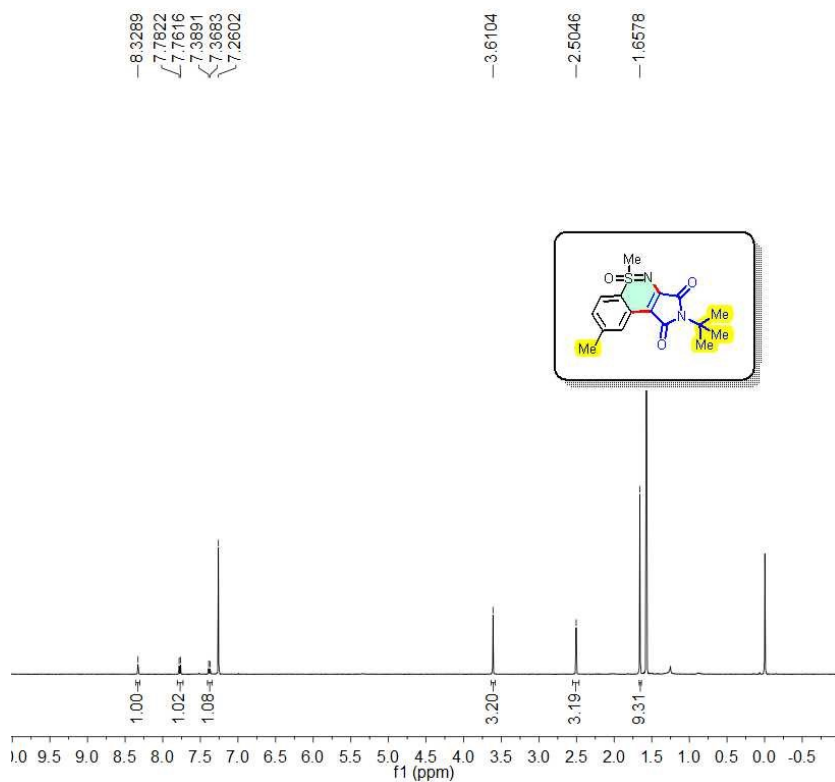

| Parameter                  | Value                                           |
|----------------------------|-------------------------------------------------|
| 1 Data File Name           | D:/373/pdata/1/1r                               |
| 2 Title                    | 22-1-syj-H.573.1.1r                             |
| 3 Comment                  |                                                 |
| 4 Origin                   | Bruker BioSpin GmbH                             |
| 5 Owner                    | nmrsu                                           |
| 6 Site                     |                                                 |
| 7 Spectrometer             | Avance NEO 400                                  |
| 8 Author                   |                                                 |
| 9 Solvent                  | CDCl3                                           |
| 10 Temperature             | 294.5                                           |
| 11 Pulse Sequence          | zg30                                            |
| 12 Experiment              | 1D                                              |
| 13 Probe                   | Z163739_0511 (PI HR-BBO400S1-BBF/ H/D-5.0-Z SP) |
| 14 Number of Scans         | 4                                               |
| 15 Receiver Gain           | 101                                             |
| 16 Relaxation Delay        | 1.0000                                          |
| 17 Pulse Width             | 8.0000                                          |
| 18 Presaturation Frequency |                                                 |
| 19 Acquisition Time        | 3.9977                                          |
| 20 Acquisition Date        | 2022-07-23T22:31:30                             |
| 21 Modification Date       | 2022-07-23T22:31:34                             |
| 22 Class                   |                                                 |
| 23 Spectrometer Frequency  | 400.15                                          |
| 24 Spectral Width          | 8196.7                                          |
| 25 Lowest Frequency        | -1637.0                                         |
| 26 Nucleus                 | 1H                                              |
| 27 Acquired Size           | 32768                                           |
| 28 Spectral Size           | 65536                                           |

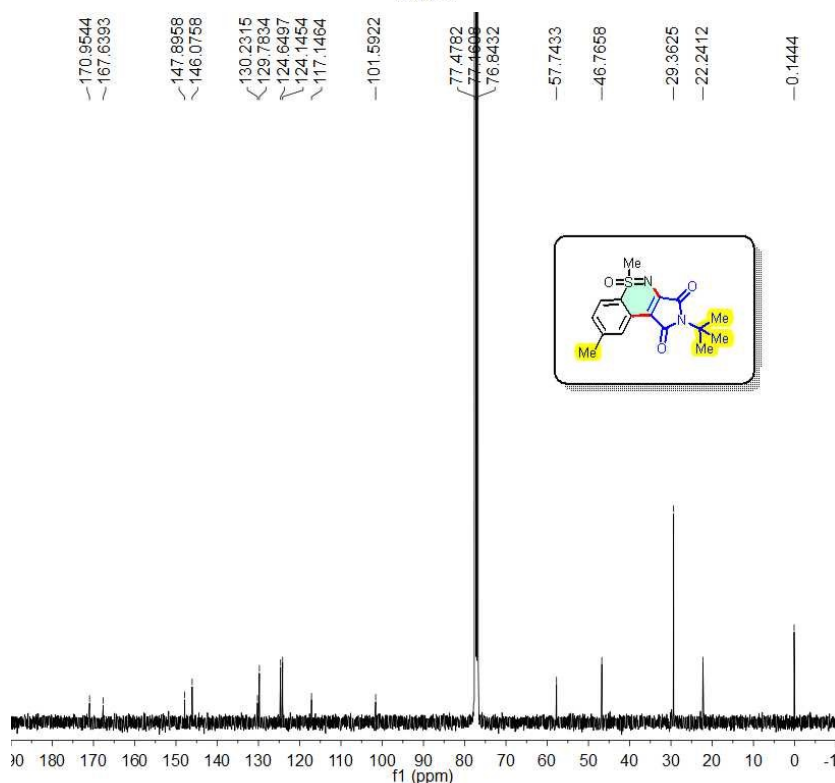

| Parameter                  | Value                                           |
|----------------------------|-------------------------------------------------|
| 1 Data File Name           | D:/183/pdata/1/1r                               |
| 2 Title                    | 22-1-syj-C.185.1.1r                             |
| 3 Comment                  |                                                 |
| 4 Origin                   | Bruker BioSpin GmbH                             |
| 5 Owner                    | nmrsu                                           |
| 6 Site                     |                                                 |
| 7 Spectrometer             | Avance NEO 400                                  |
| 8 Author                   |                                                 |
| 9 Solvent                  | CDCl3                                           |
| 10 Temperature             | 294.7                                           |
| 11 Pulse Sequence          | zgpg30                                          |
| 12 Experiment              | 1D                                              |
| 13 Probe                   | Z163739_0511 (PI HR-BBO400S1-BBF/ H/D-5.0-Z SP) |
| 14 Number of Scans         | 9000                                            |
| 15 Receiver Gain           | 15                                              |
| 16 Relaxation Delay        | 2.0000                                          |
| 17 Pulse Width             | 8.0000                                          |
| 18 Presaturation Frequency |                                                 |
| 19 Acquisition Time        | 1.3763                                          |
| 20 Acquisition Date        | 2022-07-24T07:28:19                             |
| 21 Modification Date       | 2022-07-24T07:28:22                             |
| 22 Class                   |                                                 |
| 23 Spectrometer Frequency  | 100.62                                          |
| 24 Spectral Width          | 23809.5                                         |
| 25 Lowest Frequency        | -1829.6                                         |
| 26 Nucleus                 | 13C                                             |
| 27 Acquired Size           | 32768                                           |
| 28 Spectral Size           | 32768                                           |

**2-(*tert*-Butyl)-8-methoxy-5-methyl-1*H*-5λ<sup>4</sup>-benzo[*e*]pyrrolo[3,4-*c*][1,2]thiazine-1,3(2*H*)-dione 5-oxide (product 3n)**

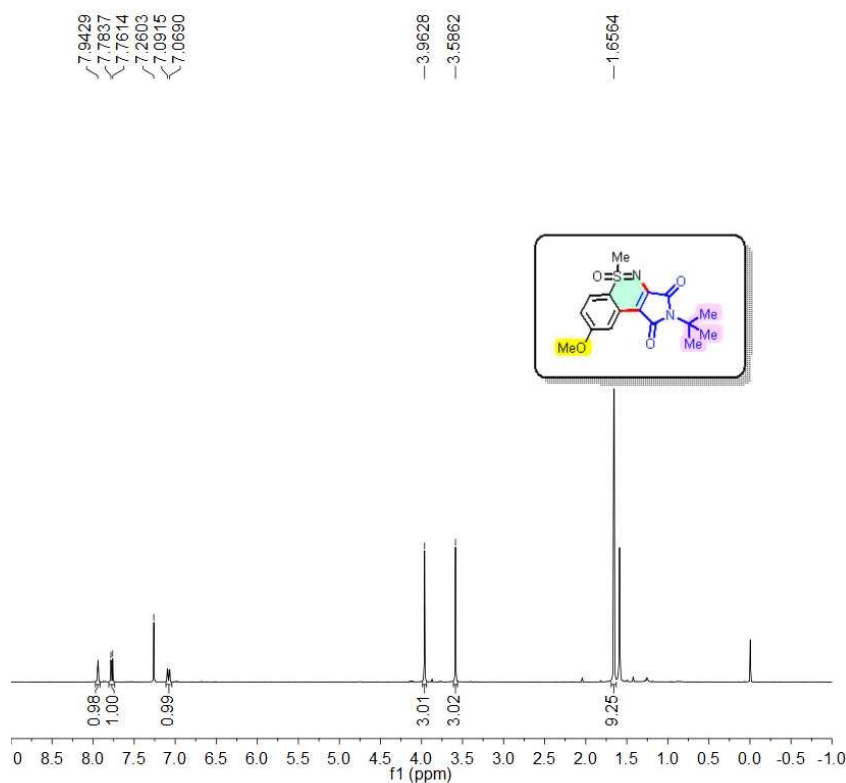

| Parameter                  | Value                                          |
|----------------------------|------------------------------------------------|
| 1 Data File Name           | D:/ 578/ pdata/ 1/ 1r                          |
| 2 Title                    | 2022-1-syj-H.578.1.1r                          |
| 3 Comment                  |                                                |
| 4 Origin                   | Bruker BioSpin GmbH                            |
| 5 Owner                    | nmsu                                           |
| 6 Site                     |                                                |
| 7 Spectrometer             | Avance NEO 400                                 |
| 8 Author                   |                                                |
| 9 Solvent                  | CDCl3                                          |
| 10 Temperature             | 295.9                                          |
| 11 Pulse Sequence          | zg30                                           |
| 12 Experiment              | 1D                                             |
| 13 Probe                   | Z163739_0032 (PI HR-400-S1-BBF/ H/ D-5.0-Z SP) |
| 14 Number of Scans         | 4                                              |
| 15 Receiver Gain           | 101                                            |
| 16 Relaxation Delay        | 1.0000                                         |
| 17 Pulse Width             | 10.0000                                        |
| 18 Presaturation Frequency |                                                |
| 19 Acquisition Time        | 3.9977                                         |
| 20 Acquisition Date        | 2022-07-15T11:40:58                            |
| 21 Modification Date       | 2022-07-15T11:40:50                            |
| 22 Class                   |                                                |
| 23 Spectrometer Frequency  | 400.13                                         |
| 24 Spectral Width          | 8196.7                                         |
| 25 Lowest Frequency        | -1637.2                                        |
| 26 Nucleus                 | 1H                                             |
| 27 Acquired Size           | 32768                                          |
| 28 Spectral Size           | 65336                                          |

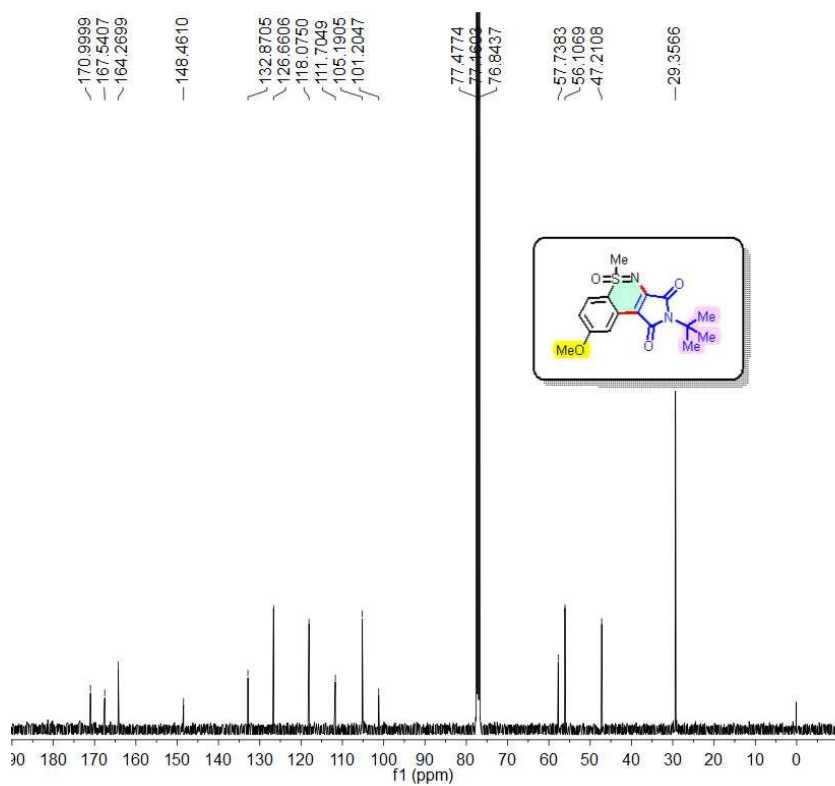

| Parameter                  | Value                                            |
|----------------------------|--------------------------------------------------|
| 1 Data File Name           | D:/ 177/ pdata/ 1/ 1r                            |
| 2 Title                    | 22-1-syj-C.177.1.1r                              |
| 3 Comment                  |                                                  |
| 4 Origin                   | Bruker BioSpin GmbH                              |
| 5 Owner                    | nmsu                                             |
| 6 Site                     |                                                  |
| 7 Spectrometer             | Avance NEO 400                                   |
| 8 Author                   |                                                  |
| 9 Solvent                  | CDCl3                                            |
| 10 Temperature             | 294.5                                            |
| 11 Pulse Sequence          | zgpg30                                           |
| 12 Experiment              | 1D                                               |
| 13 Probe                   | Z163739_0511 (PI HR-BBO400S1-BBF/ H/ D-5.0-Z SP) |
| 14 Number of Scans         | 2200                                             |
| 15 Receiver Gain           | 15                                               |
| 16 Relaxation Delay        | 2.0000                                           |
| 17 Pulse Width             | 8.0000                                           |
| 18 Presaturation Frequency |                                                  |
| 19 Acquisition Time        | 1.3763                                           |
| 20 Acquisition Date        | 2022-07-20T03:46:08                              |
| 21 Modification Date       | 2022-07-20T03:46:22                              |
| 22 Class                   |                                                  |
| 23 Spectrometer Frequency  | 100.62                                           |
| 24 Spectral Width          | 23809.5                                          |
| 25 Lowest Frequency        | -1830.8                                          |
| 26 Nucleus                 | 13C                                              |
| 27 Acquired Size           | 32768                                            |
| 28 Spectral Size           | 32768                                            |



**2,8-Di-*tert*-butyl-5-methyl-1*H*-5λ4-benzo[e]pyrrolo[3,4-*c*][1,2]thiazine-1,3(2*H*)-dione 5-oxide (product 3o)**

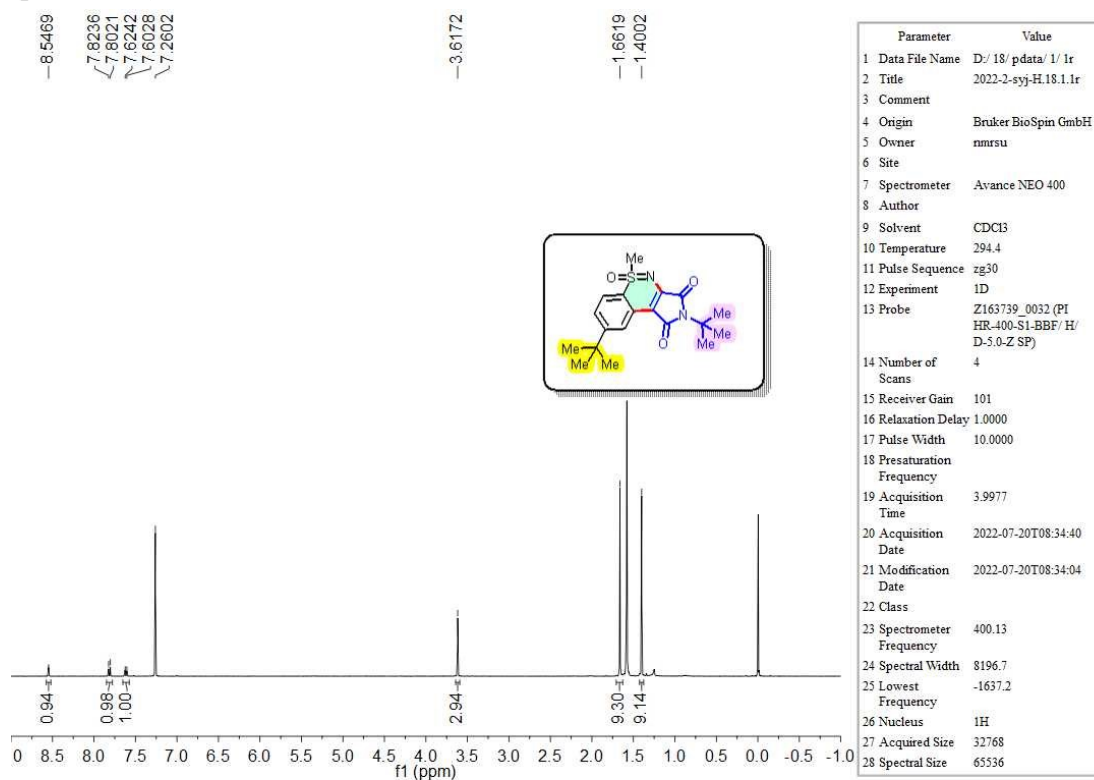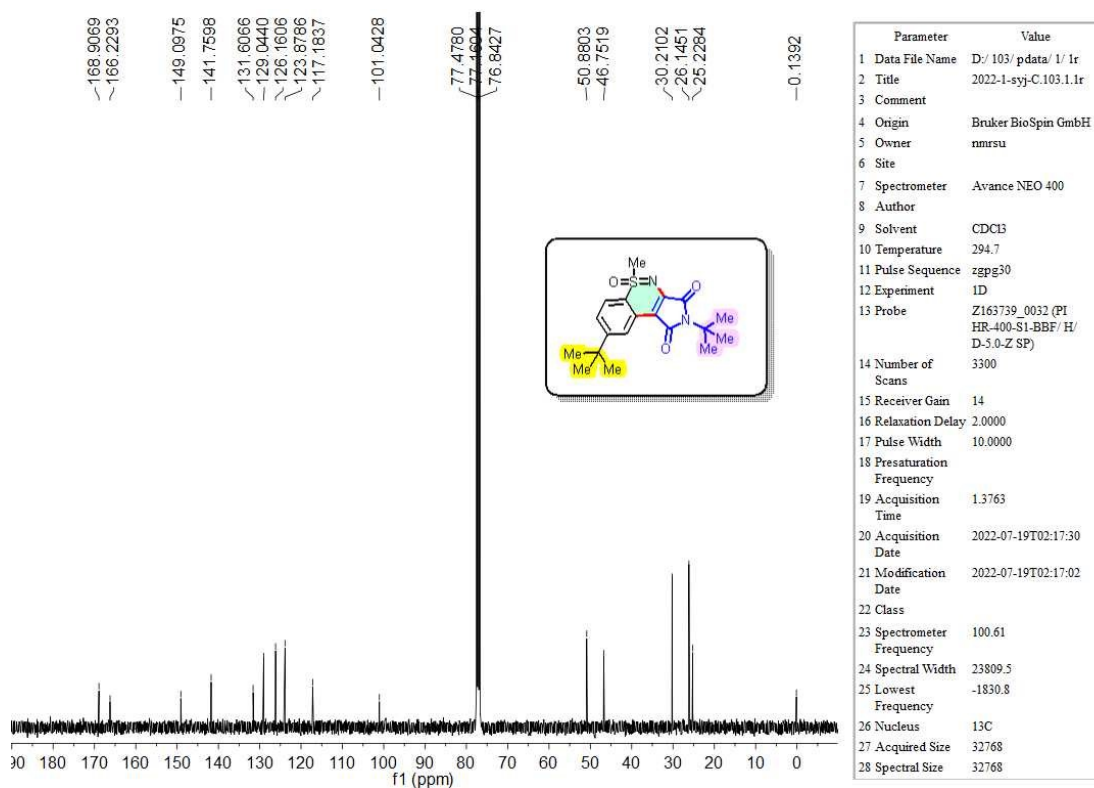

2-Benzyl-5-methyl-1*H*-5λ<sup>4</sup>-benzo[e]pyrrolo[3,4-*c*][1,2]thiazine-1,3(2*H*)-dione  
(product 3p)

5-oxide

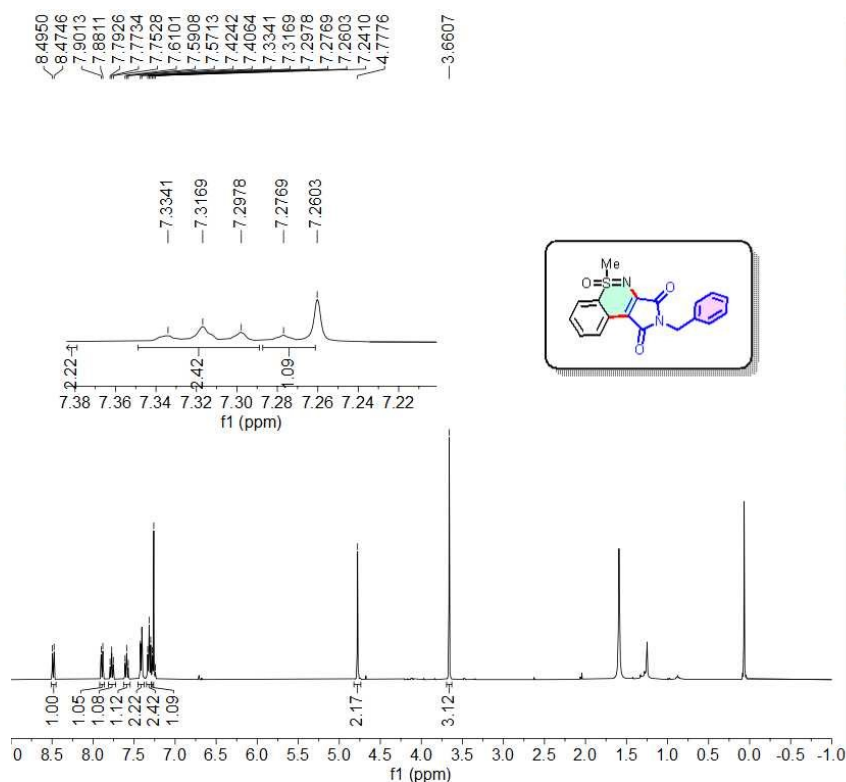

| Parameter                  | Value                                           |
|----------------------------|-------------------------------------------------|
| 1 Data File Name           | D:/536/pdata/1/1r                               |
| 2 Title                    | 22-1-syj-H.536.1.1r                             |
| 3 Comment                  |                                                 |
| 4 Origin                   | Bruker BioSpin GmbH                             |
| 5 Owner                    | nmrsu                                           |
| 6 Site                     |                                                 |
| 7 Spectrometer             | Avance NEO 400                                  |
| 8 Author                   |                                                 |
| 9 Solvent                  | CDCl <sub>3</sub>                               |
| 10 Temperature             | 294.1                                           |
| 11 Pulse Sequence          | zg30                                            |
| 12 Experiment              | ID                                              |
| 13 Probe                   | Z163739_0511 (PI HR-BBO400S1-BBF/ H/D-5.0-Z SP) |
| 14 Number of Scans         | 4                                               |
| 15 Receiver Gain           | 101                                             |
| 16 Relaxation Delay        | 1.0000                                          |
| 17 Pulse Width             | 8.0000                                          |
| 18 Presaturation Frequency |                                                 |
| 19 Acquisition Time        | 3.9977                                          |
| 20 Acquisition Date        | 2022-06-14T20:05:36                             |
| 21 Modification Date       | 2022-06-14T20:04:00                             |
| 22 Class                   |                                                 |
| 23 Spectrometer Frequency  | 400.15                                          |
| 24 Spectral Width          | 8196.7                                          |
| 25 Lowest Frequency        | -1637.0                                         |
| 26 Nucleus                 | <sup>1</sup> H                                  |
| 27 Acquired Size           | 32768                                           |
| 28 Spectral Size           | 65536                                           |

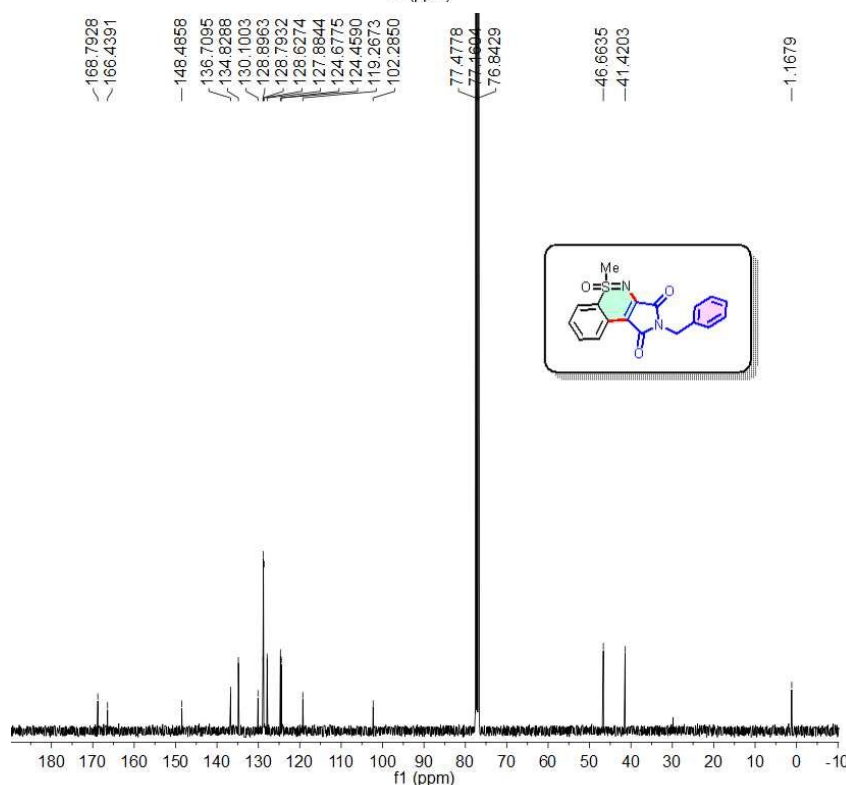

| Parameter                  | Value                                           |
|----------------------------|-------------------------------------------------|
| 1 Data File Name           | D:/96/pdata/1/1r                                |
| 2 Title                    | 22-1-syj-C.96.1.1r                              |
| 3 Comment                  |                                                 |
| 4 Origin                   | Bruker BioSpin GmbH                             |
| 5 Owner                    | nmrsu                                           |
| 6 Site                     |                                                 |
| 7 Spectrometer             | Avance NEO 400                                  |
| 8 Author                   |                                                 |
| 9 Solvent                  | CDCl <sub>3</sub>                               |
| 10 Temperature             | 295.5                                           |
| 11 Pulse Sequence          | zpgp30                                          |
| 12 Experiment              | ID                                              |
| 13 Probe                   | Z163739_0511 (PI HR-BBO400S1-BBF/ H/D-5.0-Z SP) |
| 14 Number of Scans         | 1500                                            |
| 15 Receiver Gain           | 15                                              |
| 16 Relaxation Delay        | 2.0000                                          |
| 17 Pulse Width             | 8.0000                                          |
| 18 Presaturation Frequency |                                                 |
| 19 Acquisition Time        | 1.3763                                          |
| 20 Acquisition Date        | 2022-06-15T20:09:40                             |
| 21 Modification Date       | 2022-06-15T20:08:06                             |
| 22 Class                   |                                                 |
| 23 Spectrometer Frequency  | 100.62                                          |
| 24 Spectral Width          | 23809.5                                         |
| 25 Lowest Frequency        | -1830.5                                         |
| 26 Nucleus                 | <sup>13</sup> C                                 |
| 27 Acquired Size           | 32768                                           |
| 28 Spectral Size           | 32768                                           |

**2-Benzyl-5,8-dimethyl-1*H*-5λ<sup>4</sup>-benzo[e]pyrrolo[3,4-*c*][1,2]thiazine-1,3(2*H*)-dione 5-oxide**  
**(product 3q)**

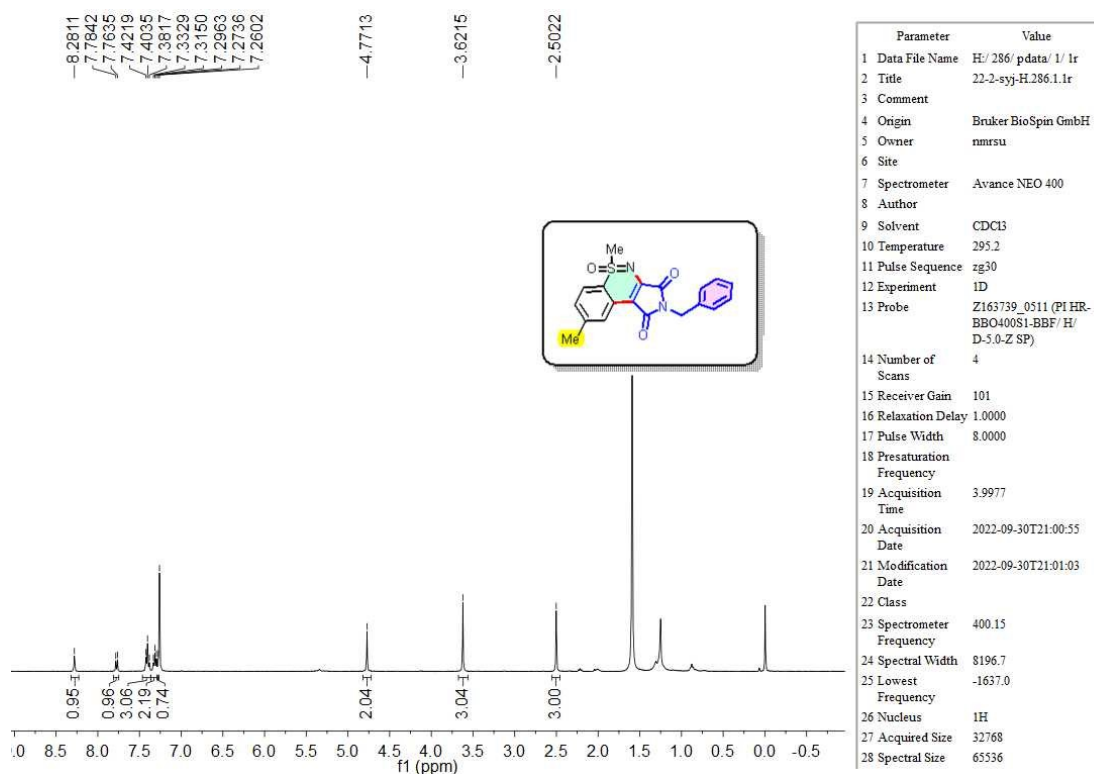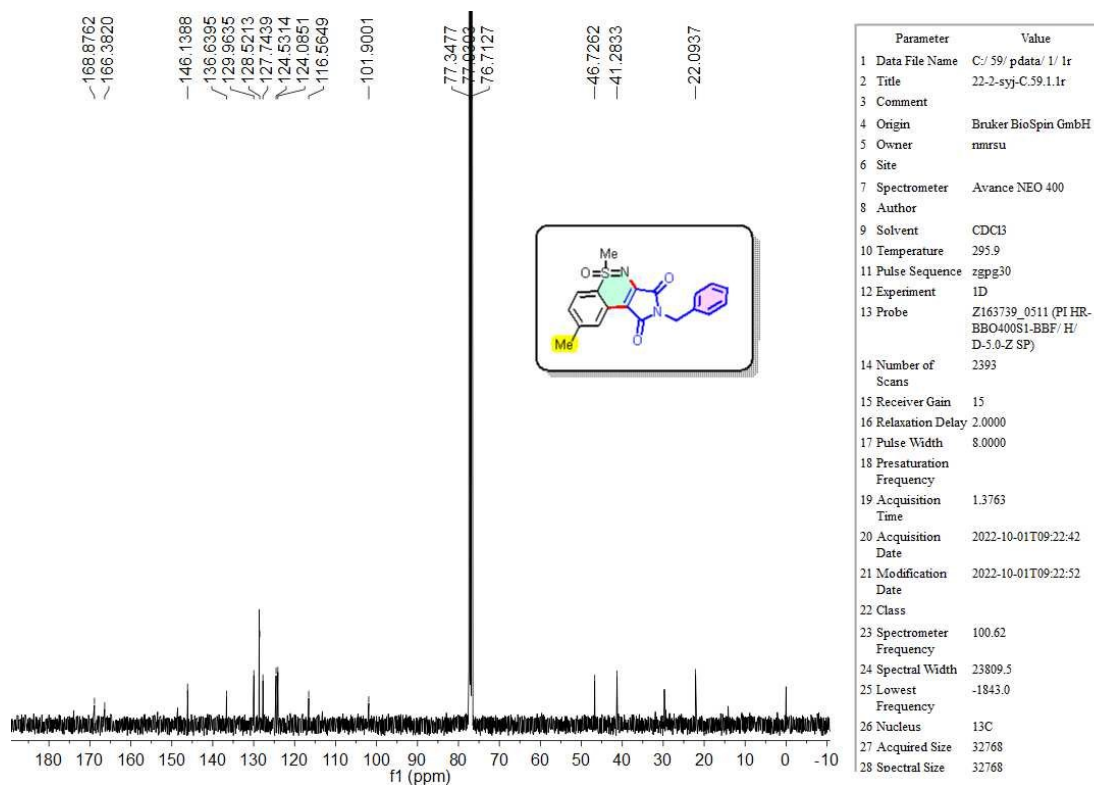

**2-Benzyl-8-methoxy-5-methyl-1H-5λ<sup>4</sup>-benzo[e]pyrrolo[3,4-c][1,2]thiazine-1,3(2H)-dione 5-oxide (product 3r)**

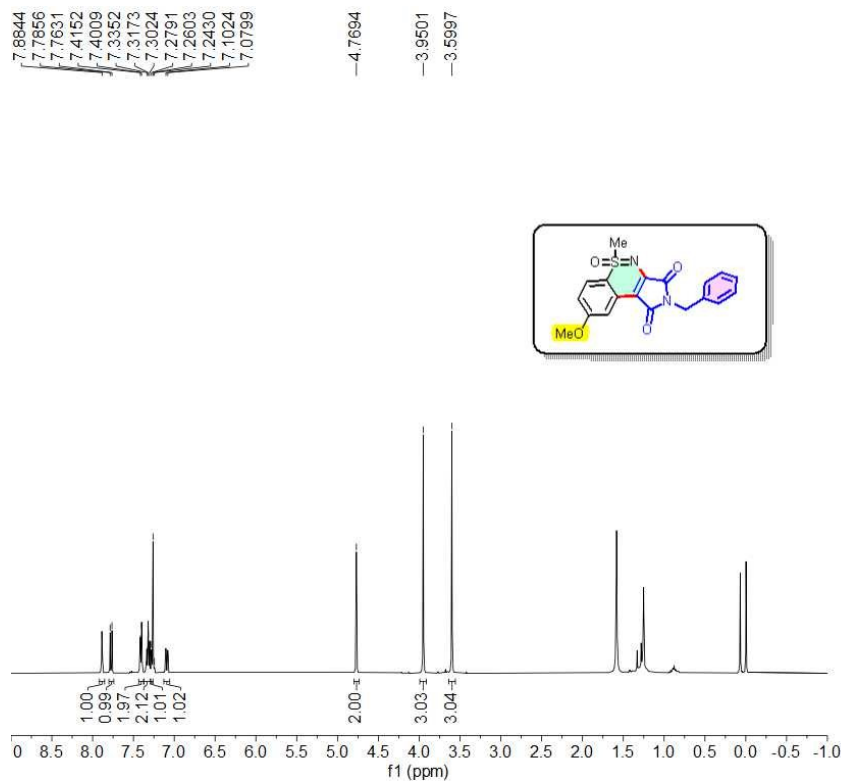

| Parameter                  | Value                                         |
|----------------------------|-----------------------------------------------|
| 1 Data File Name           | D:/519/pdata/1/1r                             |
| 2 Title                    | 2022-1-syj-H.519.1.1r                         |
| 3 Comment                  |                                               |
| 4 Origin                   | Bruker BioSpin GmbH                           |
| 5 Owner                    | nmrsu                                         |
| 6 Site                     |                                               |
| 7 Spectrometer             | Avance NEO 400                                |
| 8 Author                   |                                               |
| 9 Solvent                  | CDCl3                                         |
| 10 Temperature             | 295.6                                         |
| 11 Pulse Sequence          | zg30                                          |
| 12 Experiment              | ID                                            |
| 13 Probe                   | Z163739_0032 (PI HR-400-S1-BBF/ H/D-5.0-Z SP) |
| 14 Number of Scans         | 4                                             |
| 15 Receiver Gain           | 101                                           |
| 16 Relaxation Delay        | 1.0000                                        |
| 17 Pulse Width             | 10.0000                                       |
| 18 Presaturation Frequency |                                               |
| 19 Acquisition Time        | 3.9977                                        |
| 20 Acquisition Date        | 2022-06-26T11:19:48                           |
| 21 Modification Date       | 2022-06-26T11:17:52                           |
| 22 Class                   |                                               |
| 23 Spectrometer Frequency  | 400.13                                        |
| 24 Spectral Width          | 8196.7                                        |
| 25 Lowest Frequency        | -1637.2                                       |
| 26 Nucleus                 | 1H                                            |
| 27 Acquired Size           | 32768                                         |
| 28 Spectral Size           | 65536                                         |

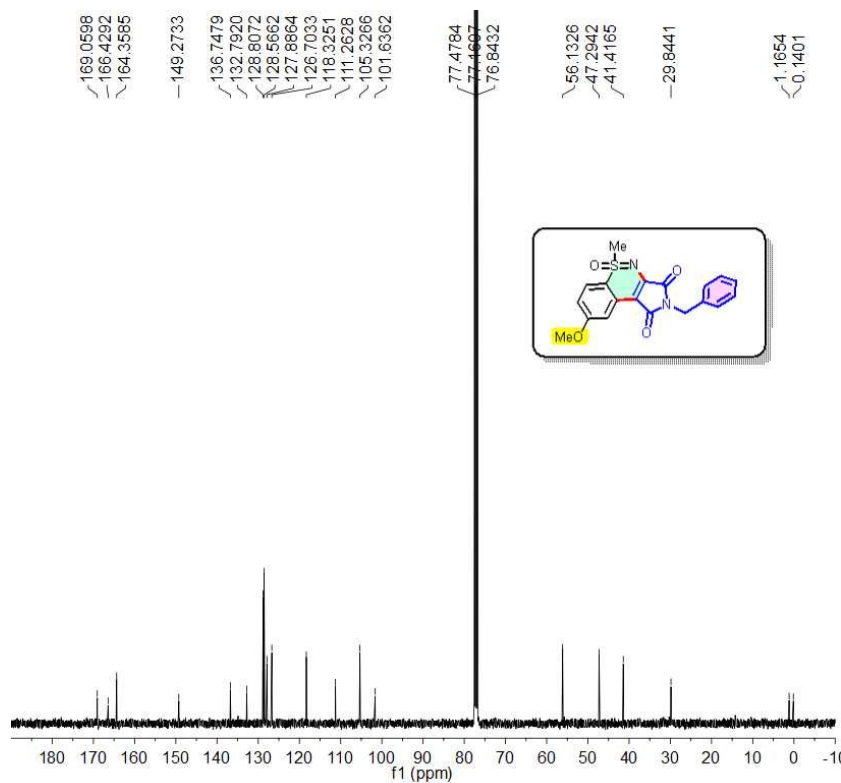

| Parameter                  | Value                                         |
|----------------------------|-----------------------------------------------|
| 1 Data File Name           | D:/519/pdata/1/1r                             |
| 2 Title                    | 2022-1-syj-C.89.1.1r                          |
| 3 Comment                  |                                               |
| 4 Origin                   | Bruker BioSpin GmbH                           |
| 5 Owner                    | nmrsu                                         |
| 6 Site                     |                                               |
| 7 Spectrometer             | Avance NEO 400                                |
| 8 Author                   |                                               |
| 9 Solvent                  | CDCl3                                         |
| 10 Temperature             | 296.4                                         |
| 11 Pulse Sequence          | zpgp30                                        |
| 12 Experiment              | ID                                            |
| 13 Probe                   | Z163739_0032 (PI HR-400-S1-BBF/ H/D-5.0-Z SP) |
| 14 Number of Scans         | 1600                                          |
| 15 Receiver Gain           | 14                                            |
| 16 Relaxation Delay        | 2.0000                                        |
| 17 Pulse Width             | 10.0000                                       |
| 18 Presaturation Frequency |                                               |
| 19 Acquisition Time        | 1.3763                                        |
| 20 Acquisition Date        | 2022-06-26T13:02:13                           |
| 21 Modification Date       | 2022-06-26T13:00:18                           |
| 22 Class                   |                                               |
| 23 Spectrometer Frequency  | 100.61                                        |
| 24 Spectral Width          | 23809.5                                       |
| 25 Lowest Frequency        | -1830.7                                       |
| 26 Nucleus                 | 13C                                           |
| 27 Acquired Size           | 32768                                         |
| 28 Spectral Size           | 32768                                         |

**2-Benzyl-8-chloro-5-methyl-1*H*-5λ<sup>4</sup>-benzo[e]pyrrolo[3,4-*c*][1,2]thiazine-1,3(2*H*)-dione oxide (product 3s)** 5-

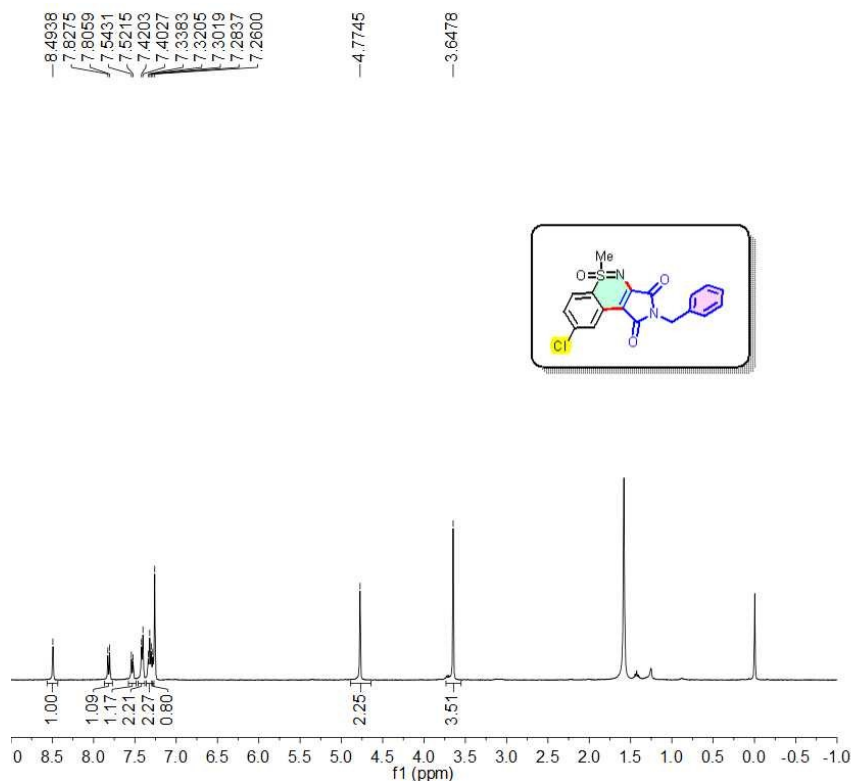

| Parameter                  | Value                                           |
|----------------------------|-------------------------------------------------|
| 1 Data File Name           | D:/159/pdata/1/1r                               |
| 2 Title                    | 22-2-syj-H.159.1.1r                             |
| 3 Comment                  |                                                 |
| 4 Origin                   | Bruker BioSpin GmbH                             |
| 5 Owner                    | nmrsu                                           |
| 6 Site                     |                                                 |
| 7 Spectrometer             | Avance NEO 400                                  |
| 8 Author                   |                                                 |
| 9 Solvent                  | CDCl3                                           |
| 10 Temperature             | 295.0                                           |
| 11 Pulse Sequence          | zg30                                            |
| 12 Experiment              | 1D                                              |
| 13 Probe                   | Z163739_0511 (PI HR-BBO400S1-BBF/ H/D-5.0-Z SP) |
| 14 Number of Scans         | 4                                               |
| 15 Receiver Gain           | 101                                             |
| 16 Relaxation Delay        | 1.0000                                          |
| 17 Pulse Width             | 8.0000                                          |
| 18 Presaturation Frequency |                                                 |
| 19 Acquisition Time        | 3.9977                                          |
| 20 Acquisition Date        | 2022-08-27T22:09:12                             |
| 21 Modification Date       | 2022-08-27T22:09:16                             |
| 22 Class                   |                                                 |
| 23 Spectrometer Frequency  | 400.15                                          |
| 24 Spectral Width          | 8196.7                                          |
| 25 Lowest Frequency        | -1637.4                                         |
| 26 Nucleus                 | 1H                                              |
| 27 Acquired Size           | 32768                                           |
| 28 Spectral Size           | 65536                                           |

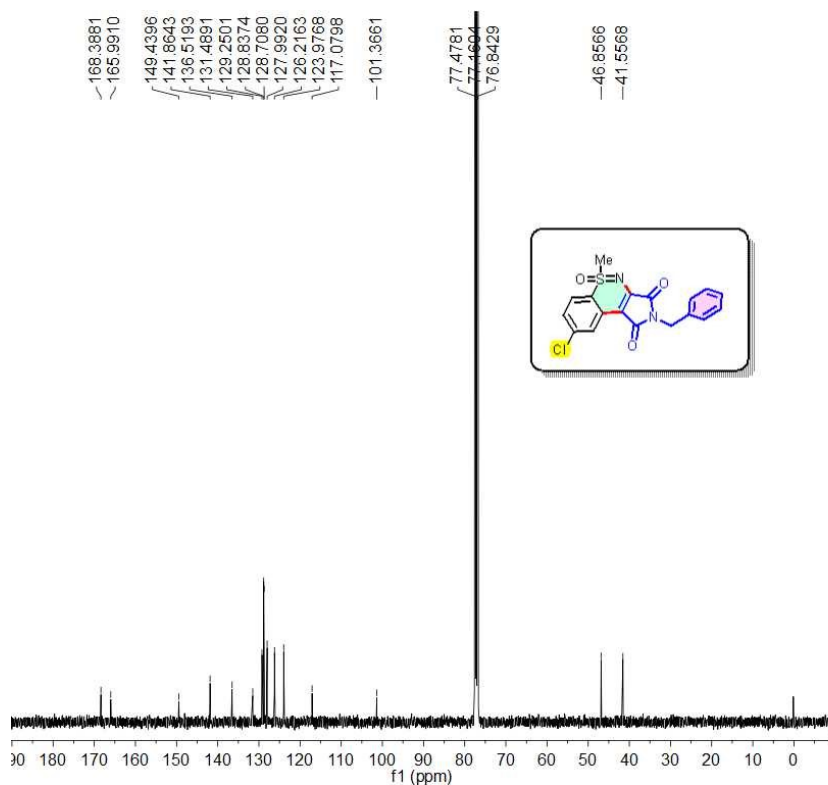

| Parameter                  | Value                                           |
|----------------------------|-------------------------------------------------|
| 1 Data File Name           | D:/16/pdata/1/1r                                |
| 2 Title                    | 22-2-syj-C.16.1.1r                              |
| 3 Comment                  |                                                 |
| 4 Origin                   | Bruker BioSpin GmbH                             |
| 5 Owner                    | nmrsu                                           |
| 6 Site                     |                                                 |
| 7 Spectrometer             | Avance NEO 400                                  |
| 8 Author                   |                                                 |
| 9 Solvent                  | CDCl3                                           |
| 10 Temperature             | 295.0                                           |
| 11 Pulse Sequence          | zgpg30                                          |
| 12 Experiment              | 1D                                              |
| 13 Probe                   | Z163739_0511 (PI HR-BBO400S1-BBF/ H/D-5.0-Z SP) |
| 14 Number of Scans         | 3000                                            |
| 15 Receiver Gain           | 14                                              |
| 16 Relaxation Delay        | 2.0000                                          |
| 17 Pulse Width             | 8.0000                                          |
| 18 Presaturation Frequency |                                                 |
| 19 Acquisition Time        | 1.3763                                          |
| 20 Acquisition Date        | 2022-08-28T01:17:48                             |
| 21 Modification Date       | 2022-08-28T01:17:56                             |
| 22 Class                   |                                                 |
| 23 Spectrometer Frequency  | 100.62                                          |
| 24 Spectral Width          | 23809.5                                         |
| 25 Lowest Frequency        | -1830.5                                         |
| 26 Nucleus                 | 13C                                             |
| 27 Acquired Size           | 32768                                           |
| 28 Spectral Size           | 32768                                           |

**2-Benzyl-7-bromo-5-methyl-1H-5λ<sup>4</sup>-benzo[e]pyrrolo[3,4-c][1,2]thiazine-1,3(2H)-dione oxide (3t)** 5-

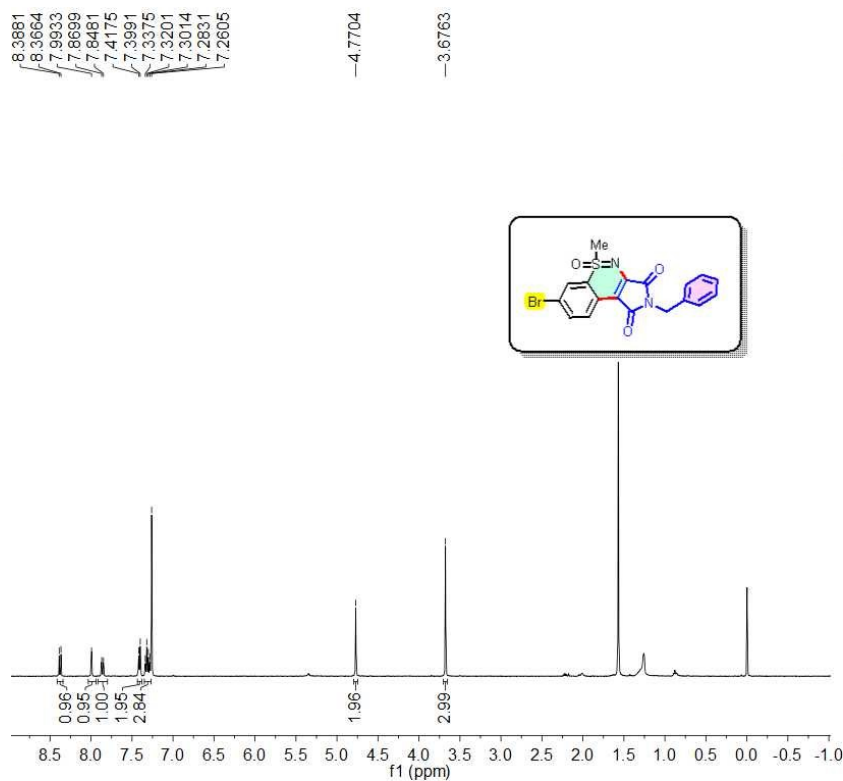

| Parameter                  | Value                                           |
|----------------------------|-------------------------------------------------|
| 1 Data File Name           | C:/ 164/ pdata/ 1/ 1r                           |
| 2 Title                    | 23-1-syj-H.164.1.1r                             |
| 3 Comment                  |                                                 |
| 4 Origin                   | Bruker BioSpin GmbH                             |
| 5 Owner                    | nmrsu                                           |
| 6 Site                     |                                                 |
| 7 Spectrometer             | Avance NEO 400                                  |
| 8 Author                   |                                                 |
| 9 Solvent                  | CDCl3                                           |
| 10 Temperature             | 294.6                                           |
| 11 Pulse Sequence          | zg30                                            |
| 12 Experiment              | 1D                                              |
| 13 Probe                   | Z163739_0511 (PI HR-BB0400S1-BBF/ H/D-5.0-Z SP) |
| 14 Number of Scans         | 4                                               |
| 15 Receiver Gain           | 101                                             |
| 16 Relaxation Delay        | 1.0000                                          |
| 17 Pulse Width             | 8.0000                                          |
| 18 Presaturation Frequency |                                                 |
| 19 Acquisition Time        | 3.9977                                          |
| 20 Acquisition Date        | 2023-04-11T21:46:32                             |
| 21 Modification Date       | 2023-04-11T21:46:44                             |
| 22 Class                   |                                                 |
| 23 Spectrometer Frequency  | 400.15                                          |
| 24 Spectral Width          | 8196.7                                          |
| 25 Lowest Frequency        | -1627.4                                         |
| 26 Nucleus                 | 1H                                              |
| 27 Acquired Size           | 32768                                           |
| 28 Spectral Size           | 65536                                           |

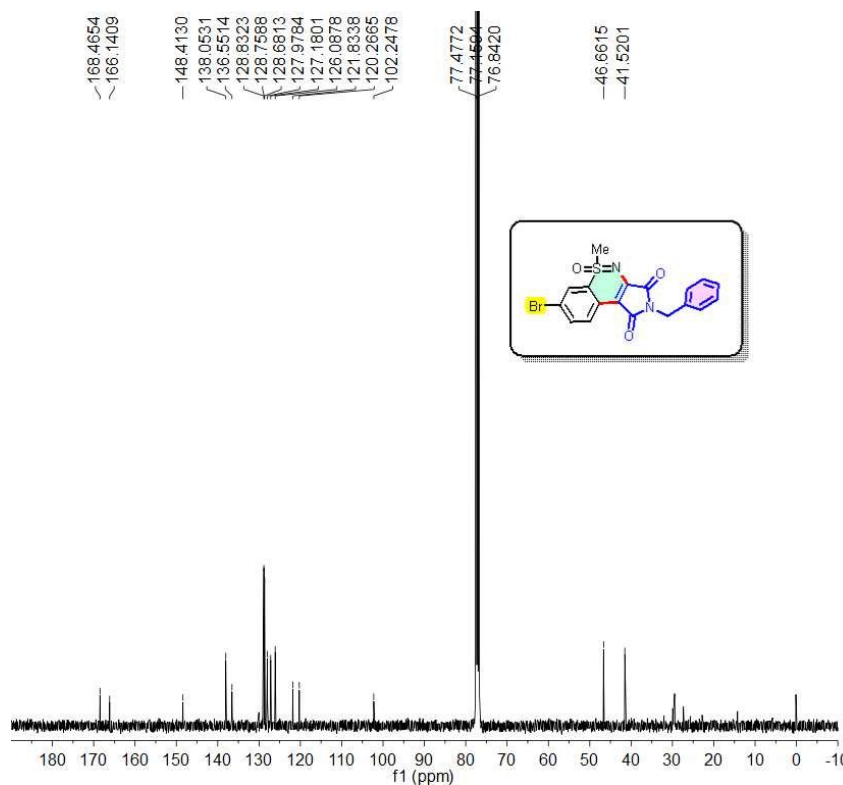

| Parameter                  | Value                                         |
|----------------------------|-----------------------------------------------|
| 1 Data File Name           | C:/ 36/ pdata/ 1/ 1r                          |
| 2 Title                    | 2023-1-syj-C.36.1.1r                          |
| 3 Comment                  |                                               |
| 4 Origin                   | Bruker BioSpin GmbH                           |
| 5 Owner                    | nmrsu                                         |
| 6 Site                     |                                               |
| 7 Spectrometer             | Avance NEO 400                                |
| 8 Author                   |                                               |
| 9 Solvent                  | CDCl3                                         |
| 10 Temperature             | 296.0                                         |
| 11 Pulse Sequence          | zgpg30                                        |
| 12 Experiment              | 1D                                            |
| 13 Probe                   | Z163739_0032 (PI HR-400-S1-BBF/ H/D-5.0-Z SP) |
| 14 Number of Scans         | 10000                                         |
| 15 Receiver Gain           | 16                                            |
| 16 Relaxation Delay        | 2.0000                                        |
| 17 Pulse Width             | 10.0000                                       |
| 18 Presaturation Frequency |                                               |
| 19 Acquisition Time        | 1.3763                                        |
| 20 Acquisition Date        | 2023-04-18T07:47:11                           |
| 21 Modification Date       | 2023-04-18T07:46:12                           |
| 22 Class                   |                                               |
| 23 Spectrometer Frequency  | 100.61                                        |
| 24 Spectral Width          | 23809.5                                       |
| 25 Lowest Frequency        | -1830.2                                       |
| 26 Nucleus                 | 13C                                           |
| 27 Acquired Size           | 32768                                         |

**2-Benzyl-8-(*tert*-butyl)-5-methyl-1*H*-5λ<sup>4</sup>-benzo[e]pyrrolo[3,4-*c*][1,2]thiazine-1,3(2*H*)-dione 5-oxide (product 3u)**

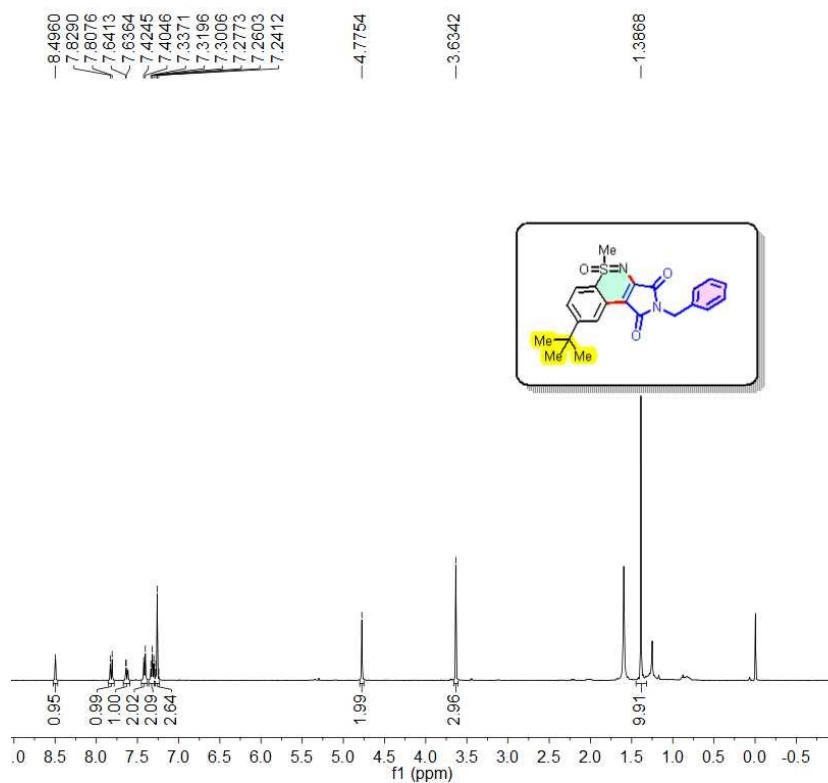

| Parameter                  | Value                                           |
|----------------------------|-------------------------------------------------|
| 1 Data File Name           | D:/ 122/ pdata/ 1/ 1r                           |
| 2 Title                    | 22-2-syj-H.122.1.1r                             |
| 3 Comment                  |                                                 |
| 4 Origin                   | Bruker BioSpin GmbH                             |
| 5 Owner                    | nmrsu                                           |
| 6 Site                     |                                                 |
| 7 Spectrometer             | Avance NEO 400                                  |
| 8 Author                   |                                                 |
| 9 Solvent                  | CDCl <sub>3</sub>                               |
| 10 Temperature             | 294.0                                           |
| 11 Pulse Sequence          | zg30                                            |
| 12 Experiment              | 1D                                              |
| 13 Probe                   | Z163739_0511 (PI HR-BBO400S1-BBF/ H/D-5.0-Z SP) |
| 14 Number of Scans         | 4                                               |
| 15 Receiver Gain           | 101                                             |
| 16 Relaxation Delay        | 1.0000                                          |
| 17 Pulse Width             | 8.0000                                          |
| 18 Presaturation Frequency |                                                 |
| 19 Acquisition Time        | 3.9977                                          |
| 20 Acquisition Date        | 2022-07-31T15:50:40                             |
| 21 Modification Date       | 2022-07-31T15:50:50                             |
| 22 Class                   |                                                 |
| 23 Spectrometer Frequency  | 400.15                                          |
| 24 Spectral Width          | 8196.7                                          |
| 25 Lowest Frequency        | -1637.0                                         |
| 26 Nucleus                 | <sup>1</sup> H                                  |
| 27 Acquired Size           | 32768                                           |
| 28 Spectral Size           | 65536                                           |

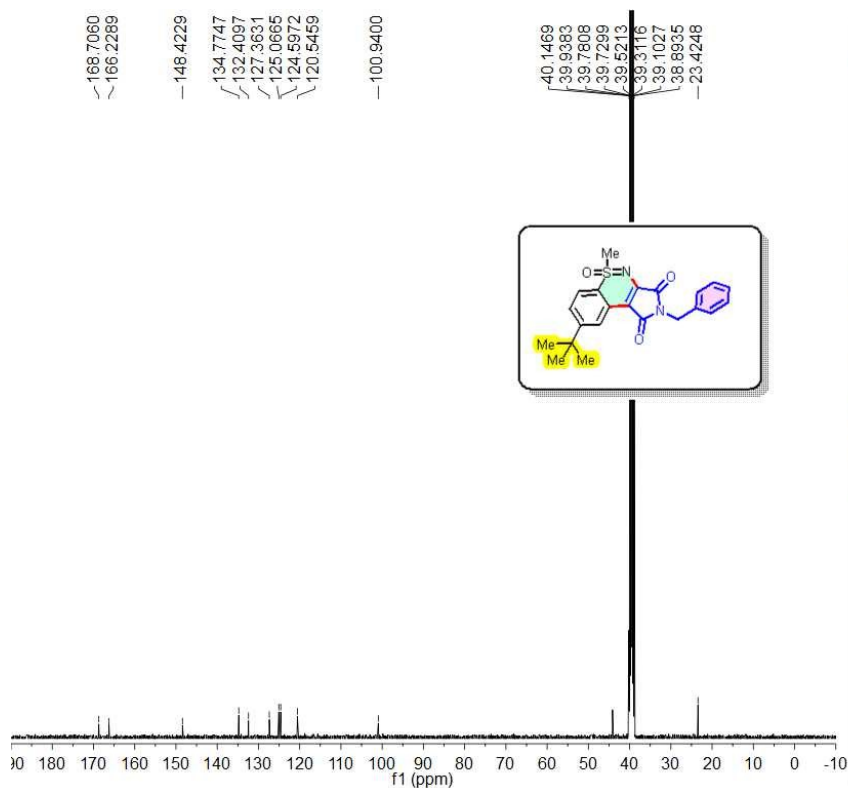

| Parameter                  | Value                                           |
|----------------------------|-------------------------------------------------|
| 1 Data File Name           | D:/ 2/ pdata/ 1/ 1r                             |
| 2 Title                    | 22-2-syj-C.2.1.1r                               |
| 3 Comment                  |                                                 |
| 4 Origin                   | Bruker BioSpin GmbH                             |
| 5 Owner                    | nmrsu                                           |
| 6 Site                     |                                                 |
| 7 Spectrometer             | Avance NEO 400                                  |
| 8 Author                   |                                                 |
| 9 Solvent                  | DMSO                                            |
| 10 Temperature             | 295.3                                           |
| 11 Pulse Sequence          | zgpg30                                          |
| 12 Experiment              | 1D                                              |
| 13 Probe                   | Z163739_0511 (PI HR-BBO400S1-BBF/ H/D-5.0-Z SP) |
| 14 Number of Scans         | 3000                                            |
| 15 Receiver Gain           | 15                                              |
| 16 Relaxation Delay        | 2.0000                                          |
| 17 Pulse Width             | 8.0000                                          |
| 18 Presaturation Frequency |                                                 |
| 19 Acquisition Time        | 1.3763                                          |
| 20 Acquisition Date        | 2022-07-10T01:27:51                             |
| 21 Modification Date       | 2022-07-10T01:27:56                             |
| 22 Class                   |                                                 |
| 23 Spectrometer Frequency  | 100.62                                          |
| 24 Spectral Width          | 23809.5                                         |
| 25 Lowest Frequency        | -1888.0                                         |
| 26 Nucleus                 | <sup>13</sup> C                                 |
| 27 Acquired Size           | 32768                                           |
| 28 Spectral Size           | 32768                                           |

**2-Cyclohexyl-5-methyl-1*H*-5λ<sup>4</sup>-benzo[e]pyrrolo[3,4-*c*][1,2]thiazine-1,3(2*H*)-dione 5-oxide (product 3v)**

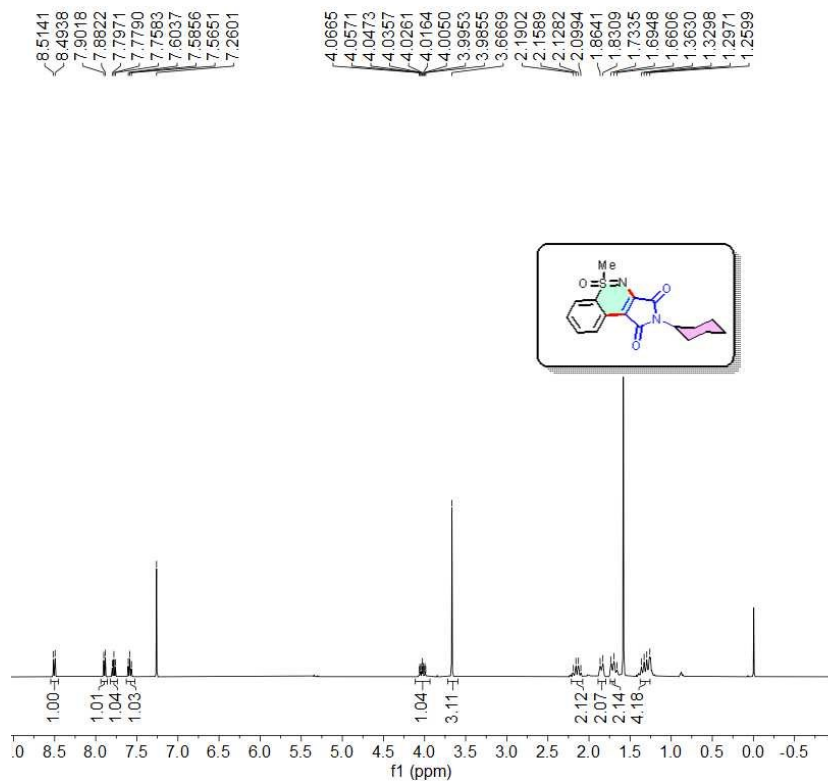

| Parameter                  | Value                                           |
|----------------------------|-------------------------------------------------|
| 1 Data File Name           | H:/heci/229/pdata/1/lr                          |
| 2 Title                    | 23-1-syj-H.229.1.lr                             |
| 3 Comment                  |                                                 |
| 4 Origin                   | Bruker BioSpin GmbH                             |
| 5 Owner                    | nmrsu                                           |
| 6 Site                     |                                                 |
| 7 Spectrometer             | Avance NEO 400                                  |
| 8 Author                   |                                                 |
| 9 Solvent                  | CDCl3                                           |
| 10 Temperature             | 296.5                                           |
| 11 Pulse Sequence          | zg30                                            |
| 12 Experiment              | ID                                              |
| 13 Probe                   | Z163739_0511 (PI HR-BBO400S1-BBF/ H/D-5.0-Z SP) |
| 14 Number of Scans         | 4                                               |
| 15 Receiver Gain           | 101                                             |
| 16 Relaxation Delay        | 1.0000                                          |
| 17 Pulse Width             | 8.0000                                          |
| 18 Presaturation Frequency |                                                 |
| 19 Acquisition Time        | 3.9977                                          |
| 20 Acquisition Date        | 2023-05-04T22:17:47                             |
| 21 Modification Date       | 2023-05-04T22:17:54                             |
| 22 Class                   |                                                 |
| 23 Spectrometer Frequency  | 400.15                                          |
| 24 Spectral Width          | 8196.7                                          |
| 25 Lowest Frequency        | -1637.0                                         |
| 26 Nucleus                 | 1H                                              |
| 27 Acquired Size           | 32768                                           |
| 28 Spectral Size           | 65536                                           |

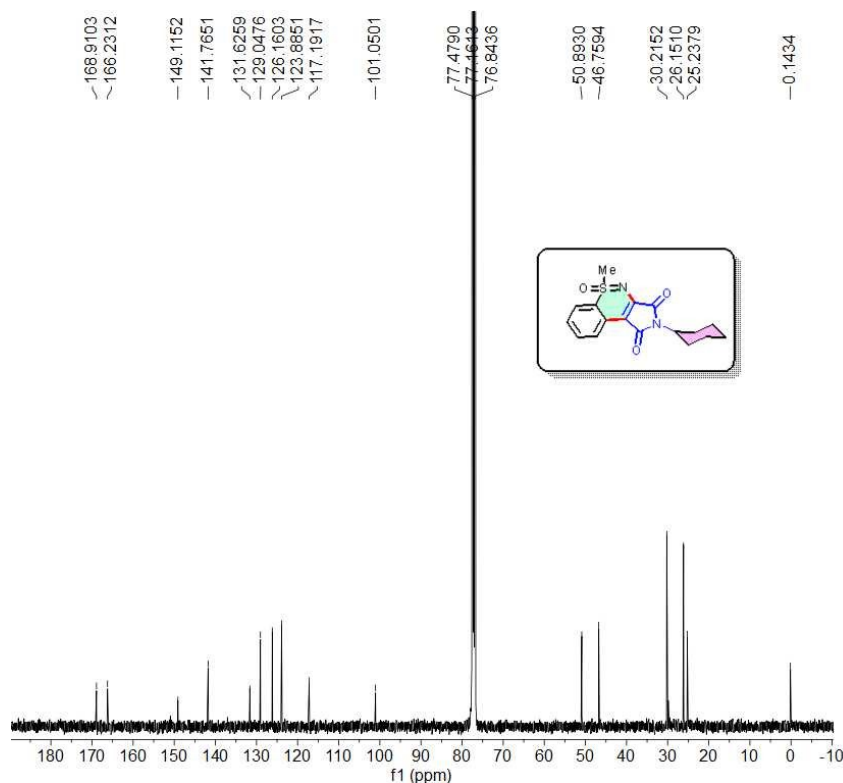

| Parameter                  | Value                                           |
|----------------------------|-------------------------------------------------|
| 1 Data File Name           | H:/heci/55/pdata/1/lr                           |
| 2 Title                    | 22-2-syj-C.55.1.lr                              |
| 3 Comment                  |                                                 |
| 4 Origin                   | Bruker BioSpin GmbH                             |
| 5 Owner                    | nmrsu                                           |
| 6 Site                     |                                                 |
| 7 Spectrometer             | Avance NEO 400                                  |
| 8 Author                   |                                                 |
| 9 Solvent                  | CDCl3                                           |
| 10 Temperature             | 296.0                                           |
| 11 Pulse Sequence          | zgpg30                                          |
| 12 Experiment              | ID                                              |
| 13 Probe                   | Z163739_0511 (PI HR-BBO400S1-BBF/ H/D-5.0-Z SP) |
| 14 Number of Scans         | 10000                                           |
| 15 Receiver Gain           | 14                                              |
| 16 Relaxation Delay        | 2.0000                                          |
| 17 Pulse Width             | 8.0000                                          |
| 18 Presaturation Frequency |                                                 |
| 19 Acquisition Time        | 1.3763                                          |
| 20 Acquisition Date        | 2022-10-01T06:59:17                             |
| 21 Modification Date       | 2022-10-01T06:59:34                             |
| 22 Class                   |                                                 |
| 23 Spectrometer Frequency  | 100.62                                          |
| 24 Spectral Width          | 23809.5                                         |
| 25 Lowest Frequency        | -1829.6                                         |
| 26 Nucleus                 | 13C                                             |
| 27 Acquired Size           | 32768                                           |



**8-Chloro-2-cyclohexyl-5-methyl-1*H*-5λ<sup>4</sup>-benzo[*e*]pyrrolo[3,4-*c*][1,2]thiazine-1,3(2*H*)-dione 5-oxide (product 3w)**

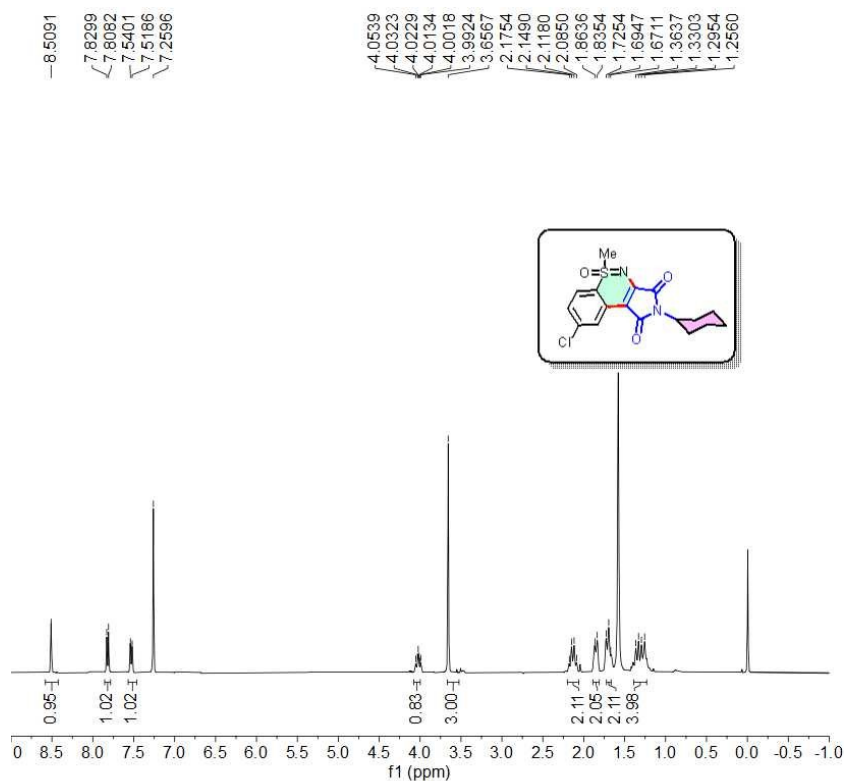

| Parameter                  | Value                                          |
|----------------------------|------------------------------------------------|
| 1 Data File Name           | D:/161/pdata/1/1r                              |
| 2 Title                    | 22-2-syj-H.161.1.1r                            |
| 3 Comment                  |                                                |
| 4 Origin                   | Bruker BioSpin GmbH                            |
| 5 Owner                    | nmsu                                           |
| 6 Site                     |                                                |
| 7 Spectrometer             | Avance NEO 400                                 |
| 8 Author                   |                                                |
| 9 Solvent                  | CDCl <sub>3</sub>                              |
| 10 Temperature             | 295.0                                          |
| 11 Pulse Sequence          | zg30                                           |
| 12 Experiment              | 1D                                             |
| 13 Probe                   | Z163739_0511 (PI HR-BBO400S1-BBF/H/D-5.0-Z SP) |
| 14 Number of Scans         | 4                                              |
| 15 Receiver Gain           | 101                                            |
| 16 Relaxation Delay        | 1.0000                                         |
| 17 Pulse Width             | 8.0000                                         |
| 18 Presaturation Frequency |                                                |
| 19 Acquisition Time        | 3.9977                                         |
| 20 Acquisition Date        | 2022-08-27T22:19:58                            |
| 21 Modification Date       | 2022-08-27T22:20:02                            |
| 22 Class                   |                                                |
| 23 Spectrometer Frequency  | 400.15                                         |
| 24 Spectral Width          | 8196.7                                         |
| 25 Lowest Frequency        | -1637.4                                        |
| 26 Nucleus                 | <sup>1</sup> H                                 |
| 27 Acquired Size           | 32768                                          |
| 28 Spectral Size           | 65536                                          |

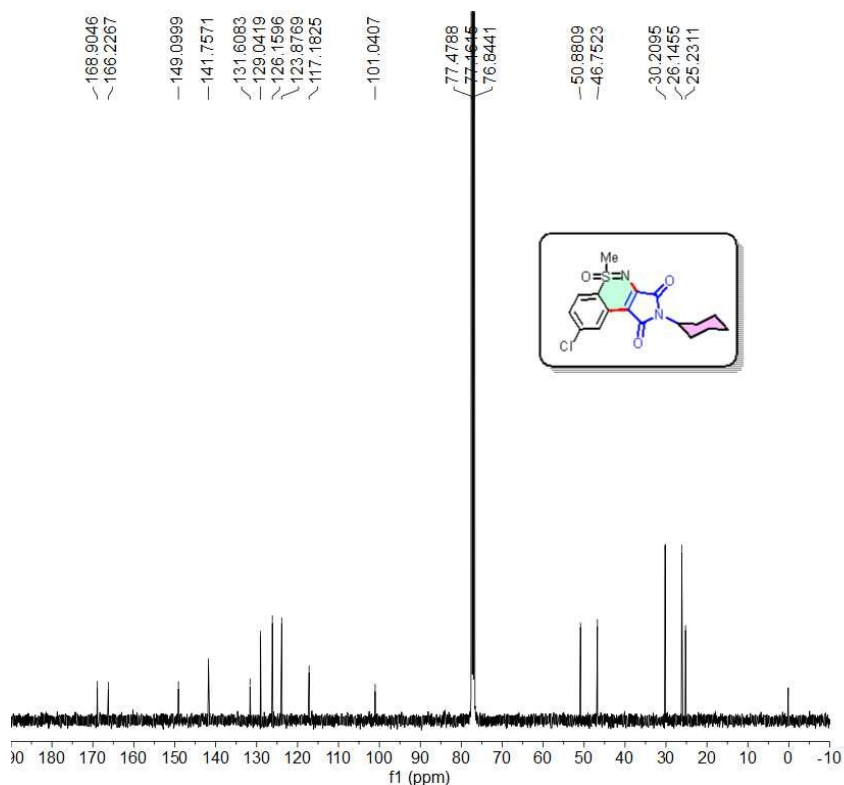

| Parameter                  | Value                                          |
|----------------------------|------------------------------------------------|
| 1 Data File Name           | D:/17/pdata/1/1r                               |
| 2 Title                    | 22-2-syj-C.17.1.1r                             |
| 3 Comment                  |                                                |
| 4 Origin                   | Bruker BioSpin GmbH                            |
| 5 Owner                    | nmsu                                           |
| 6 Site                     |                                                |
| 7 Spectrometer             | Avance NEO 400                                 |
| 8 Author                   |                                                |
| 9 Solvent                  | CDCl <sub>3</sub>                              |
| 10 Temperature             | 295.0                                          |
| 11 Pulse Sequence          | zgpg30                                         |
| 12 Experiment              | 1D                                             |
| 13 Probe                   | Z163739_0511 (PI HR-BBO400S1-BBF/H/D-5.0-Z SP) |
| 14 Number of Scans         | 4500                                           |
| 15 Receiver Gain           | 14                                             |
| 16 Relaxation Delay        | 2.0000                                         |
| 17 Pulse Width             | 8.0000                                         |
| 18 Presaturation Frequency |                                                |
| 19 Acquisition Time        | 1.3763                                         |
| 20 Acquisition Date        | 2022-08-28T05:40:48                            |
| 21 Modification Date       | 2022-08-28T05:40:53                            |
| 22 Class                   |                                                |
| 23 Spectrometer Frequency  | 100.62                                         |
| 24 Spectral Width          | 23809.5                                        |
| 25 Lowest Frequency        | -1830.3                                        |
| 26 Nucleus                 | <sup>13</sup> C                                |
| 27 Acquired Size           | 32768                                          |

2-Methyl-5-phenyl-1*H*-5 $\lambda^4$ -benzo[e]pyrrolo[3,4-*c*][1,2]thiazine-1,3(2*H*)-dione  
(product 3x)

5-oxide

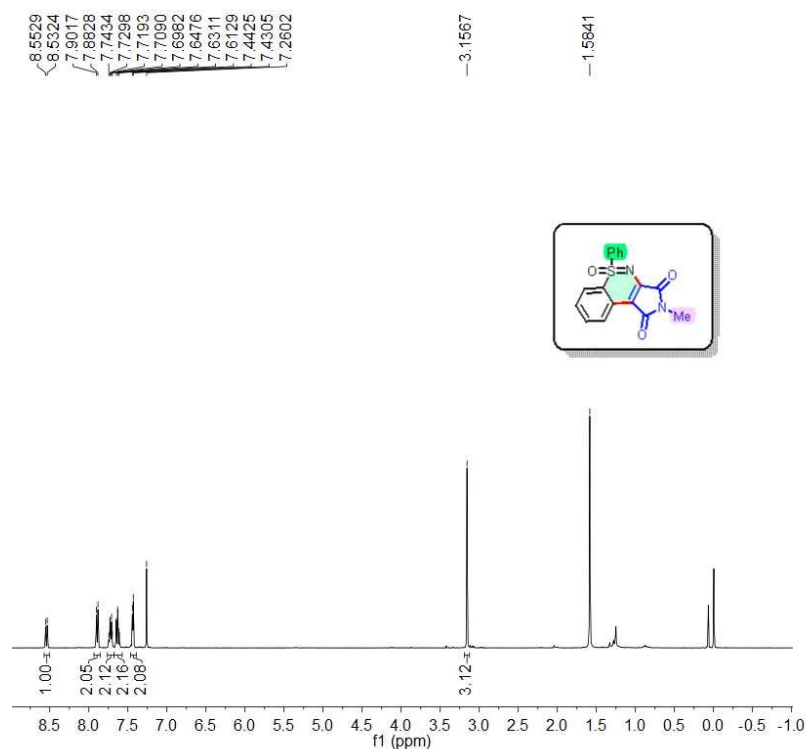

| Parameter                  | Value                                          |
|----------------------------|------------------------------------------------|
| 1 Data File Name           | D:/22/pdata/1/1r                               |
| 2 Title                    | 22-1-syj-H.622.1.1r                            |
| 3 Comment                  |                                                |
| 4 Origin                   | Bruker BioSpin GmbH                            |
| 5 Owner                    | nmsru                                          |
| 6 Site                     |                                                |
| 7 Spectrometer             | Avance NEO 400                                 |
| 8 Author                   |                                                |
| 9 Solvent                  | CDCl3                                          |
| 10 Temperature             | 295.8                                          |
| 11 Pulse Sequence          | zg30                                           |
| 12 Experiment              | 1D                                             |
| 13 Probe                   | Z163739_0511 (PI HR-BBO400S1-BBF/H/D-5.0-Z SP) |
| 14 Number of Scans         | 4                                              |
| 15 Receiver Gain           | 101                                            |
| 16 Relaxation Delay        | 1.0000                                         |
| 17 Pulse Width             | 8.0000                                         |
| 18 Presaturation Frequency |                                                |
| 19 Acquisition Time        | 3.9977                                         |
| 20 Acquisition Date        | 2022-06-25T18:25:20                            |
| 21 Modification Date       | 2022-06-25T18:25:26                            |
| 22 Class                   |                                                |
| 23 Spectrometer Frequency  | 400.15                                         |
| 24 Spectral Width          | 8196.7                                         |
| 25 Lowest Frequency        | -1637.0                                        |
| 26 Nucleus                 | 1H                                             |
| 27 Acquired Size           | 32768                                          |
| 28 Spectral Size           | 65336                                          |

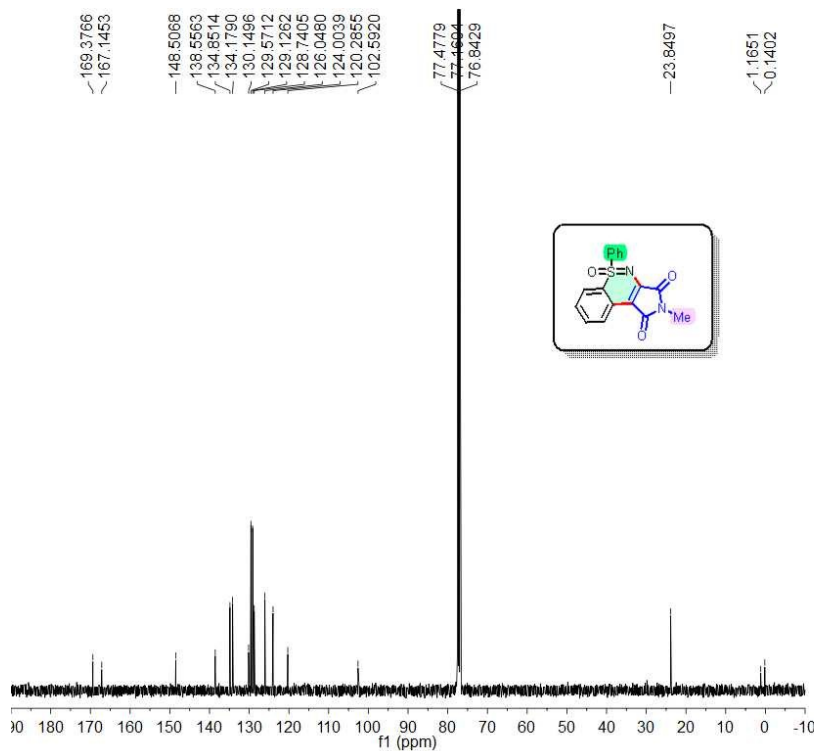

| Parameter                  | Value                                          |
|----------------------------|------------------------------------------------|
| 1 Data File Name           | D:/131/pdata/1/1r                              |
| 2 Title                    | 22-1-syj-C.131.1.1r                            |
| 3 Comment                  |                                                |
| 4 Origin                   | Bruker BioSpin GmbH                            |
| 5 Owner                    | nmsru                                          |
| 6 Site                     |                                                |
| 7 Spectrometer             | Avance NEO 400                                 |
| 8 Author                   |                                                |
| 9 Solvent                  | CDCl3                                          |
| 10 Temperature             | 296.5                                          |
| 11 Pulse Sequence          | zgpg30                                         |
| 12 Experiment              | 1D                                             |
| 13 Probe                   | Z163739_0511 (PI HR-BBO400S1-BBF/H/D-5.0-Z SP) |
| 14 Number of Scans         | 1200                                           |
| 15 Receiver Gain           | 14                                             |
| 16 Relaxation Delay        | 2.0000                                         |
| 17 Pulse Width             | 8.0000                                         |
| 18 Presaturation Frequency |                                                |
| 19 Acquisition Time        | 1.3763                                         |
| 20 Acquisition Date        | 2022-06-25T20:17:54                            |
| 21 Modification Date       | 2022-06-25T20:18:00                            |
| 22 Class                   |                                                |
| 23 Spectrometer Frequency  | 100.62                                         |
| 24 Spectral Width          | 23809.5                                        |
| 25 Lowest Frequency        | -1829.9                                        |
| 26 Nucleus                 | 13C                                            |
| 27 Acquired Size           | 32768                                          |
| 28 Spectral Size           | 32768                                          |

**2-Ethyl-5-phenyl-1*H*-5λ<sup>4</sup>-benzo[e]pyrrolo[3,4-*c*][1,2]thiazine-1,3(2*H*)-dione 5-oxide (product 3y)**

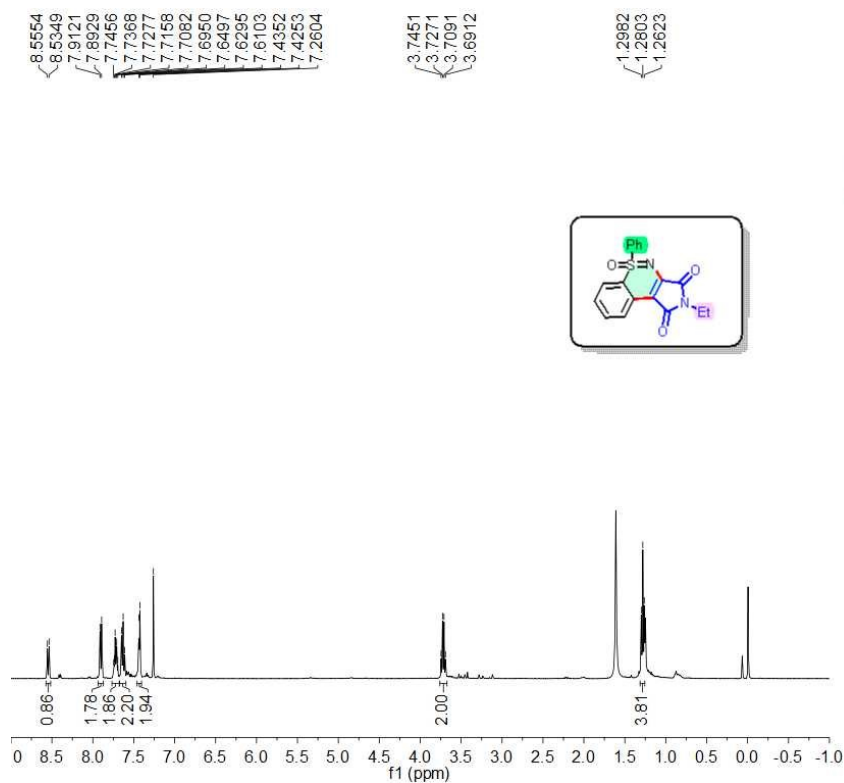

| Parameter                  | Value                                           |
|----------------------------|-------------------------------------------------|
| 1 Data File Name           | H:/287/pdata/1/1r                               |
| 2 Title                    | 22-2-syj-H.287.1.1r                             |
| 3 Comment                  |                                                 |
| 4 Origin                   | Bruker BioSpin GmbH                             |
| 5 Owner                    | nmrsu                                           |
| 6 Site                     |                                                 |
| 7 Spectrometer             | Avance NEO 400                                  |
| 8 Author                   |                                                 |
| 9 Solvent                  | CDCl3                                           |
| 10 Temperature             | 295.2                                           |
| 11 Pulse Sequence          | zg30                                            |
| 12 Experiment              | 1D                                              |
| 13 Probe                   | Z163739_0511 (PI.HR-BBO400S1-BBF/ H/D-5.0-Z SP) |
| 14 Number of Scans         | 4                                               |
| 15 Receiver Gain           | 101                                             |
| 16 Relaxation Delay        | 1.0000                                          |
| 17 Pulse Width             | 8.0000                                          |
| 18 Presaturation Frequency |                                                 |
| 19 Acquisition Time        | 3.9977                                          |
| 20 Acquisition Date        | 2022-09-30T21:05:52                             |
| 21 Modification Date       | 2022-09-30T21:06:01                             |
| 22 Class                   |                                                 |
| 23 Spectrometer Frequency  | 400.15                                          |
| 24 Spectral Width          | 8196.7                                          |
| 25 Lowest Frequency        | -1637.0                                         |
| 26 Nucleus                 | 1H                                              |
| 27 Acquired Size           | 32768                                           |
| 28 Spectral Size           | 65536                                           |

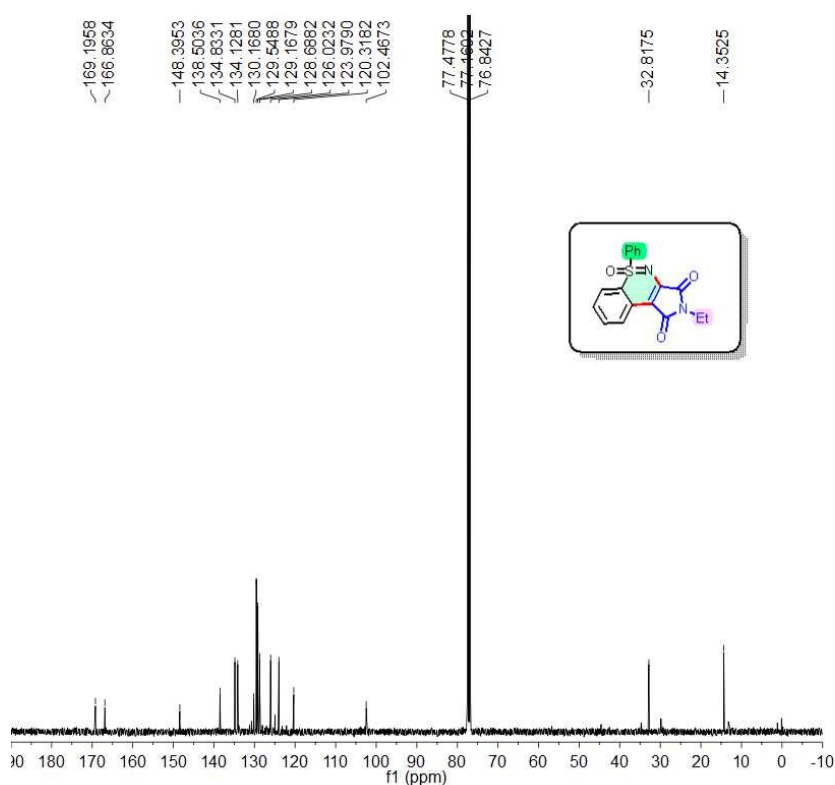

| Parameter                  | Value                                         |
|----------------------------|-----------------------------------------------|
| 1 Data File Name           | D:/ 94/pdata/1/1r                             |
| 2 Title                    | 2022-1-syj-C.94.1.1r                          |
| 3 Comment                  |                                               |
| 4 Origin                   | Bruker BioSpin GmbH                           |
| 5 Owner                    | nmrsu                                         |
| 6 Site                     |                                               |
| 7 Spectrometer             | Avance NEO 400                                |
| 8 Author                   |                                               |
| 9 Solvent                  | CDCl3                                         |
| 10 Temperature             | 295.6                                         |
| 11 Pulse Sequence          | zgpg30                                        |
| 12 Experiment              | 1D                                            |
| 13 Probe                   | Z163739_0032 (PI.HR-400-S1-BBF/ H/D-5.0-Z SP) |
| 14 Number of Scans         | 1024                                          |
| 15 Receiver Gain           | 11                                            |
| 16 Relaxation Delay        | 2.0000                                        |
| 17 Pulse Width             | 10.0000                                       |
| 18 Presaturation Frequency |                                               |
| 19 Acquisition Time        | 1.3763                                        |
| 20 Acquisition Date        | 2022-07-02T15:17:53                           |
| 21 Modification Date       | 2022-07-02T15:17:22                           |
| 22 Class                   |                                               |
| 23 Spectrometer Frequency  | 100.61                                        |
| 24 Spectral Width          | 23809.5                                       |
| 25 Lowest Frequency        | -1831.5                                       |
| 26 Nucleus                 | 13C                                           |
| 27 Acquired Size           | 32768                                         |
| 28 Spectral Size           | 32768                                         |

**2-(*tert*-Butyl)-5-phenyl-1*H*-5 $\lambda^4$ -benzo[e]pyrrolo[3,4-*c*][1,2]thiazine-1,3(2*H*)-dione 5-oxide**  
**(product 3z)**

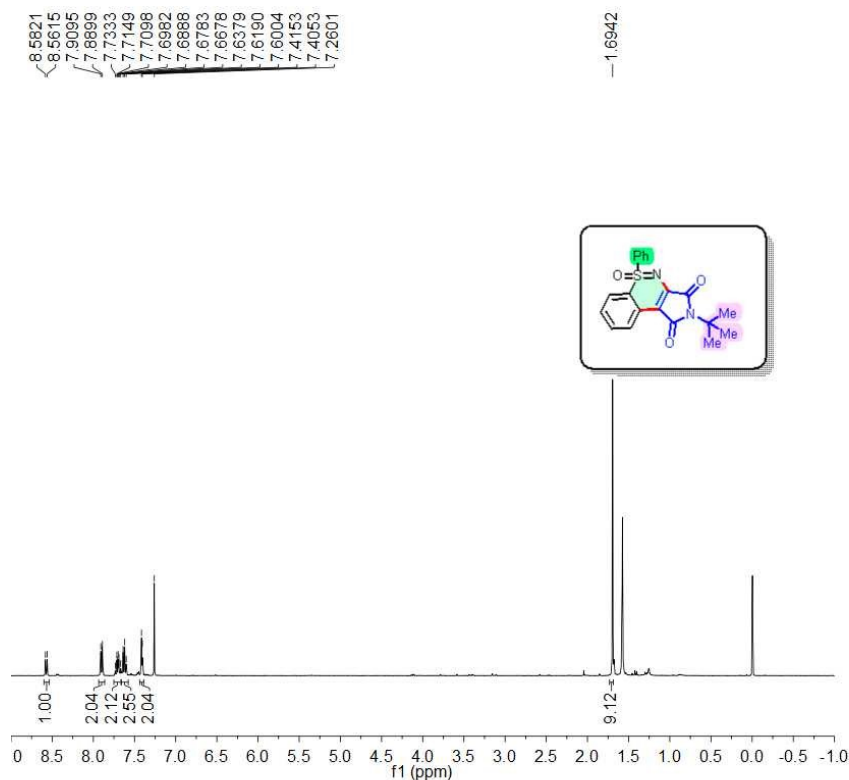

| Parameter                  | Value                                           |
|----------------------------|-------------------------------------------------|
| 1 Data File Name           | D:/ 682/ pdata/ 1/ 1r                           |
| 2 Title                    | 22-1-syj-H.682.1.1r                             |
| 3 Comment                  |                                                 |
| 4 Origin                   | Bruker BioSpin GmbH                             |
| 5 Owner                    | nmsru                                           |
| 6 Site                     |                                                 |
| 7 Spectrometer             | Avance NEO 400                                  |
| 8 Author                   |                                                 |
| 9 Solvent                  | CDCl3                                           |
| 10 Temperature             | 295.2                                           |
| 11 Pulse Sequence          | zg30                                            |
| 12 Experiment              | 1D                                              |
| 13 Probe                   | Z163739_0511 (PIHR-BBO400S1-BBF/ H/ D-5.0-Z.SP) |
| 14 Number of Scans         | 4                                               |
| 15 Receiver Gain           | 101                                             |
| 16 Relaxation Delay        | 1.0000                                          |
| 17 Pulse Width             | 8.0000                                          |
| 18 Presaturation Frequency |                                                 |
| 19 Acquisition Time        | 3.9977                                          |
| 20 Acquisition Date        | 2022-07-13T10:00:48                             |
| 21 Modification Date       | 2022-07-13T10:00:56                             |
| 22 Class                   |                                                 |
| 23 Spectrometer Frequency  | 400.15                                          |
| 24 Spectral Width          | 8196.7                                          |
| 25 Lowest Frequency        | -1637.0                                         |
| 26 Nucleus                 | 1H                                              |
| 27 Acquired Size           | 32768                                           |
| 28 Spectral Size           | 65536                                           |

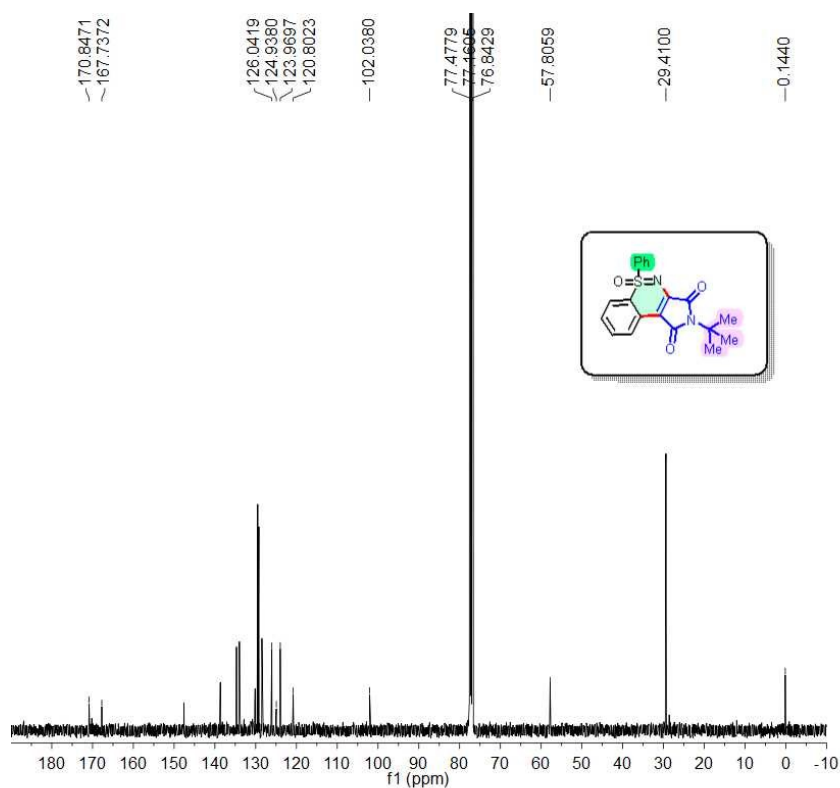

| Parameter                  | Value                                         |
|----------------------------|-----------------------------------------------|
| 1 Data File Name           | D:/ 105/ pdata/ 1/ 1r                         |
| 2 Title                    | 2022-1-syj-C.105.1.1r                         |
| 3 Comment                  |                                               |
| 4 Origin                   | Bruker BioSpin GmbH                           |
| 5 Owner                    | nmsru                                         |
| 6 Site                     |                                               |
| 7 Spectrometer             | Avance NEO 400                                |
| 8 Author                   |                                               |
| 9 Solvent                  | CDCl3                                         |
| 10 Temperature             | 294.7                                         |
| 11 Pulse Sequence          | zgpg30                                        |
| 12 Experiment              | 1D                                            |
| 13 Probe                   | Z163739_0032 (PIHR-400-S1-BBF/ H/ D-5.0-Z.SP) |
| 14 Number of Scans         | 2500                                          |
| 15 Receiver Gain           | 13                                            |
| 16 Relaxation Delay        | 2.0000                                        |
| 17 Pulse Width             | 10.0000                                       |
| 18 Presaturation Frequency |                                               |
| 19 Acquisition Time        | 1.3763                                        |
| 20 Acquisition Date        | 2022-07-19T07:58:52                           |
| 21 Modification Date       | 2022-07-19T07:58:22                           |
| 22 Class                   |                                               |
| 23 Spectrometer Frequency  | 100.61                                        |
| 24 Spectral Width          | 23809.5                                       |
| 25 Lowest Frequency        | -1843.5                                       |
| 26 Nucleus                 | 13C                                           |
| 27 Acquired Size           | 32768                                         |
| 28 Spectral Size           | 32768                                         |

**2-Ethyl-5,10-dimethyl-5λ<sup>4</sup>-pyrrolo[3',4':3,4][1,2]thiazino[5,6-*b*]indole-1,3(2*H*,10*H*)-dione 5-oxide (5a)**

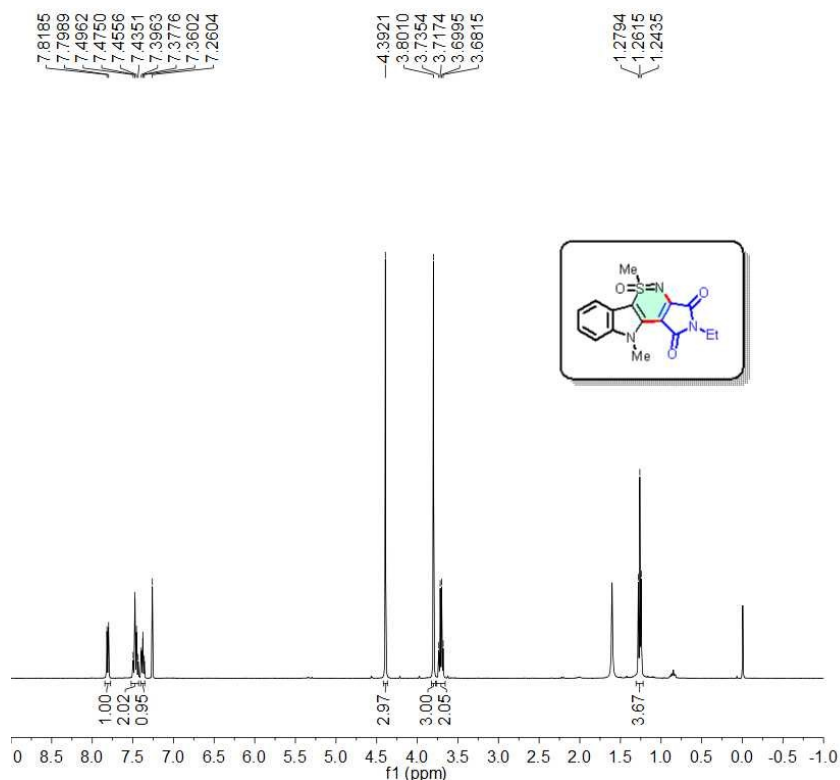

| Parameter                  | Value                                           |
|----------------------------|-------------------------------------------------|
| 1 Data File Name           | C:/ 补充产物/ 170/ pdata/ 1/ 1r                     |
| 2 Title                    | 23-1-syj-H170.1.1r                              |
| 3 Comment                  |                                                 |
| 4 Origin                   | Bruker BioSpin GmbH                             |
| 5 Owner                    | nmrsu                                           |
| 6 Site                     |                                                 |
| 7 Spectrometer             | Avance NEO 400                                  |
| 8 Author                   |                                                 |
| 9 Solvent                  | CDCl3                                           |
| 10 Temperature             | 294.4                                           |
| 11 Pulse Sequence          | zg30                                            |
| 12 Experiment              | 1D                                              |
| 13 Probe                   | Z163739_0511 (PIHR-BBO400S1-BBF/ H/ D-5.0-Z SP) |
| 14 Number of Scans         | 4                                               |
| 15 Receiver Gain           | 101                                             |
| 16 Relaxation Delay        | 1.0000                                          |
| 17 Pulse Width             | 8.0000                                          |
| 18 Presaturation Frequency |                                                 |
| 19 Acquisition Time        | 3.9977                                          |
| 20 Acquisition Date        | 2023-04-15T09:59:14                             |
| 21 Modification Date       | 2023-04-15T09:59:28                             |
| 22 Class                   |                                                 |
| 23 Spectrometer Frequency  | 400.15                                          |
| 24 Spectral Width          | 8196.7                                          |
| 25 Lowest Frequency        | -1637.0                                         |
| 26 Nucleus                 | 1H                                              |
| 27 Acquired Size           | 32768                                           |
| 28 Spectral Size           | 65536                                           |

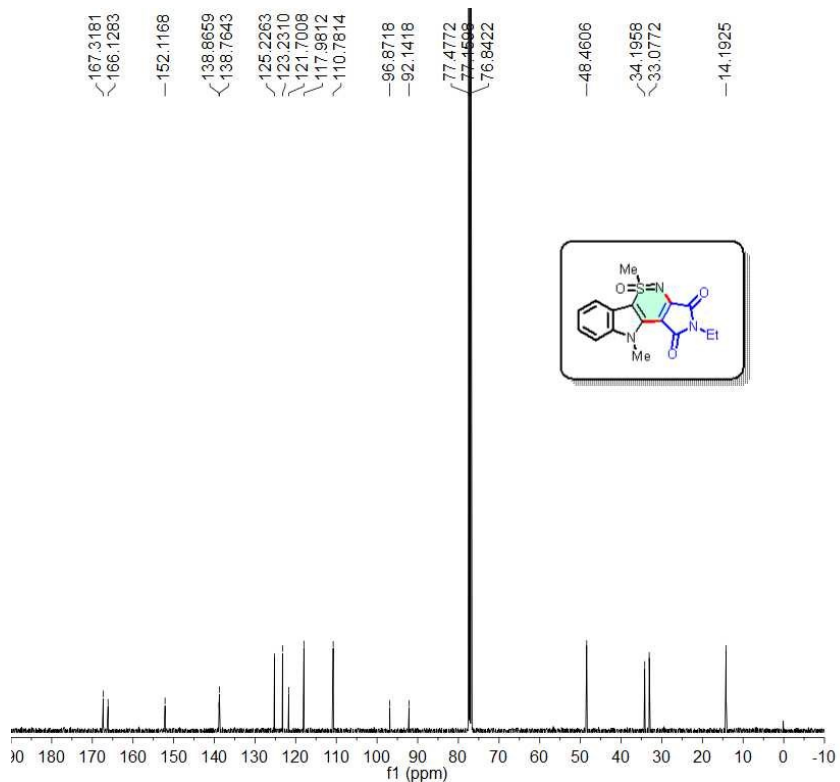

| Parameter                  | Value                                           |
|----------------------------|-------------------------------------------------|
| 1 Data File Name           | C:/ 补充产物/ 45/ pdata/ 1/ 1r                      |
| 2 Title                    | 23-1-syj-C45.1.1r                               |
| 3 Comment                  |                                                 |
| 4 Origin                   | Bruker BioSpin GmbH                             |
| 5 Owner                    | nmrsu                                           |
| 6 Site                     |                                                 |
| 7 Spectrometer             | Avance NEO 400                                  |
| 8 Author                   |                                                 |
| 9 Solvent                  | CDCl3                                           |
| 10 Temperature             | 295.0                                           |
| 11 Pulse Sequence          | zpgg30                                          |
| 12 Experiment              | 1D                                              |
| 13 Probe                   | Z163739_0511 (PIHR-BBO400S1-BBF/ H/ D-5.0-Z SP) |
| 14 Number of Scans         | 1024                                            |
| 15 Receiver Gain           | 12                                              |
| 16 Relaxation Delay        | 2.0000                                          |
| 17 Pulse Width             | 8.0000                                          |
| 18 Presaturation Frequency |                                                 |
| 19 Acquisition Time        | 1.3763                                          |
| 20 Acquisition Date        | 2023-04-15T13:25:20                             |
| 21 Modification Date       | 2023-04-15T13:25:34                             |
| 22 Class                   |                                                 |
| 23 Spectrometer Frequency  | 100.62                                          |
| 24 Spectral Width          | 23809.5                                         |
| 25 Lowest Frequency        | -1831.4                                         |
| 26 Nucleus                 | 13C                                             |
| 27 Acquired Size           | 32768                                           |
| 28 Spectral Size           | 32768                                           |

**2-Benzyl-5,10-dimethyl-5λ<sup>4</sup>-pyrrolo[3',4':3,4][1,2]thiazino[5,6-*b*]indole-1,3(2*H*,10*H*)-dione 5-oxide (5b)**

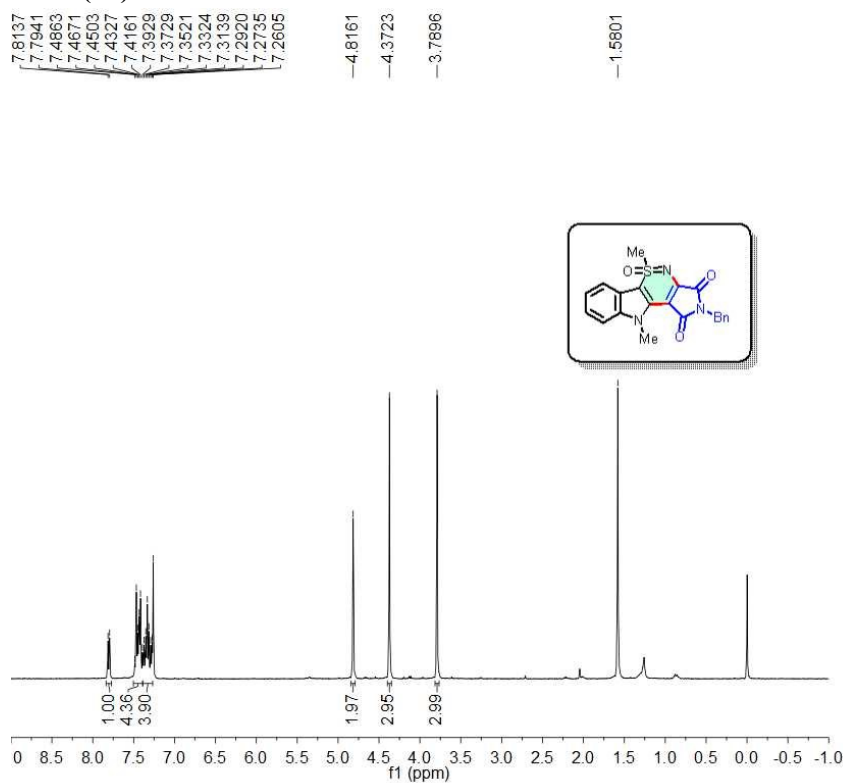

| Parameter                  | Value                                          |
|----------------------------|------------------------------------------------|
| 1 Data File Name           | C:/235/pdata/1/1r                              |
| 2 Title                    | 2023-1-syj-H.235.1.1r                          |
| 3 Comment                  |                                                |
| 4 Origin                   | Bruker BioSpin GmbH                            |
| 5 Owner                    | nmrsu                                          |
| 6 Site                     |                                                |
| 7 Spectrometer             | Avance NEO 400                                 |
| 8 Author                   |                                                |
| 9 Solvent                  | CDCl3                                          |
| 10 Temperature             | 294.9                                          |
| 11 Pulse Sequence          | zg30                                           |
| 12 Experiment              | 1D                                             |
| 13 Probe                   | Z163739_0032 (PI HR-400-S1-BBF/ H/ D-5.0-Z SP) |
| 14 Number of Scans         | 4                                              |
| 15 Receiver Gain           | 101                                            |
| 16 Relaxation Delay        | 1.0000                                         |
| 17 Pulse Width             | 10.0000                                        |
| 18 Presaturation Frequency |                                                |
| 19 Acquisition Time        | 3.9977                                         |
| 20 Acquisition Date        | 2023-04-15T09:58:29                            |
| 21 Modification Date       | 2023-04-15T09:57:46                            |
| 22 Class                   |                                                |
| 23 Spectrometer Frequency  | 400.13                                         |
| 24 Spectral Width          | 8196.7                                         |
| 25 Lowest Frequency        | -1637.2                                        |
| 26 Nucleus                 | 1H                                             |
| 27 Acquired Size           | 32768                                          |
| 28 Spectral Size           | 65536                                          |

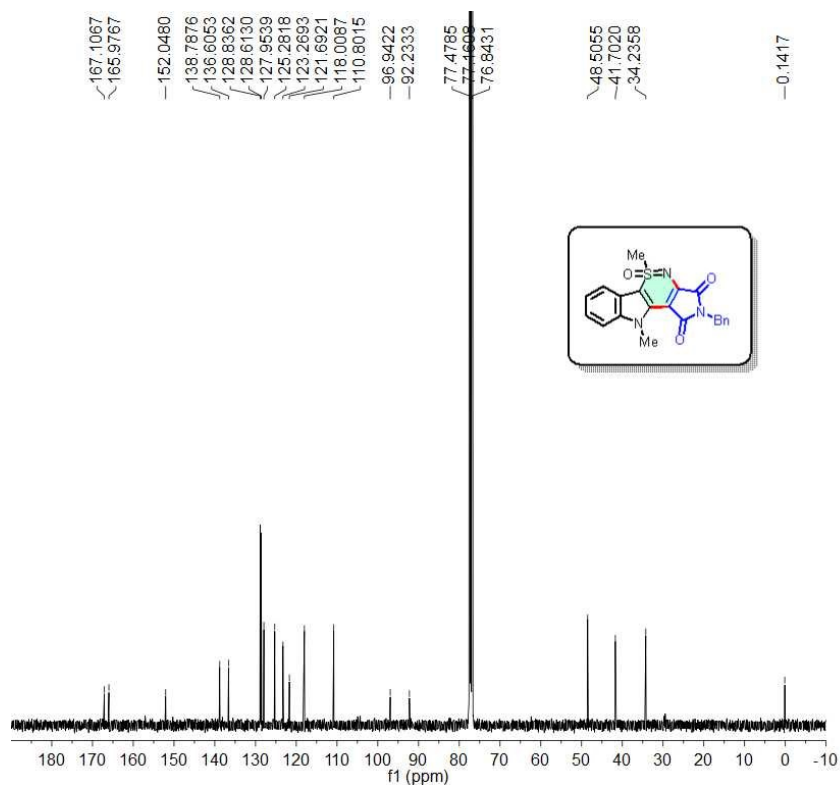

| Parameter                  | Value                                          |
|----------------------------|------------------------------------------------|
| 1 Data File Name           | C:/95/pdata/1/1r                               |
| 2 Title                    | 2023-1-syj-C.35.1.1r                           |
| 3 Comment                  |                                                |
| 4 Origin                   | Bruker BioSpin GmbH                            |
| 5 Owner                    | nmrsu                                          |
| 6 Site                     |                                                |
| 7 Spectrometer             | Avance NEO 400                                 |
| 8 Author                   |                                                |
| 9 Solvent                  | CDCl3                                          |
| 10 Temperature             | 295.8                                          |
| 11 Pulse Sequence          | zgpg30                                         |
| 12 Experiment              | 1D                                             |
| 13 Probe                   | Z163739_0032 (PI HR-400-S1-BBF/ H/ D-5.0-Z SP) |
| 14 Number of Scans         | 5000                                           |
| 15 Receiver Gain           | 17                                             |
| 16 Relaxation Delay        | 2.0000                                         |
| 17 Pulse Width             | 10.0000                                        |
| 18 Presaturation Frequency |                                                |
| 19 Acquisition Time        | 1.3763                                         |
| 20 Acquisition Date        | 2023-04-17T03:18:07                            |
| 21 Modification Date       | 2023-04-17T03:17:16                            |
| 22 Class                   |                                                |
| 23 Spectrometer Frequency  | 100.61                                         |
| 24 Spectral Width          | 23809.5                                        |
| 25 Lowest Frequency        | -1830.6                                        |
| 26 Nucleus                 | 13C                                            |
| 27 Acquired Size           | 32768                                          |
| 28 Spectral Size           | 32768                                          |

**2-Cyclohexyl-5,10-dimethyl-5 $\lambda$ -4-pyrrolo[3',4':3,4][1,2]thiazino[5,6-*b*]indole-1,3(2*H*,10*H*)-dione 5-oxide (5c)**

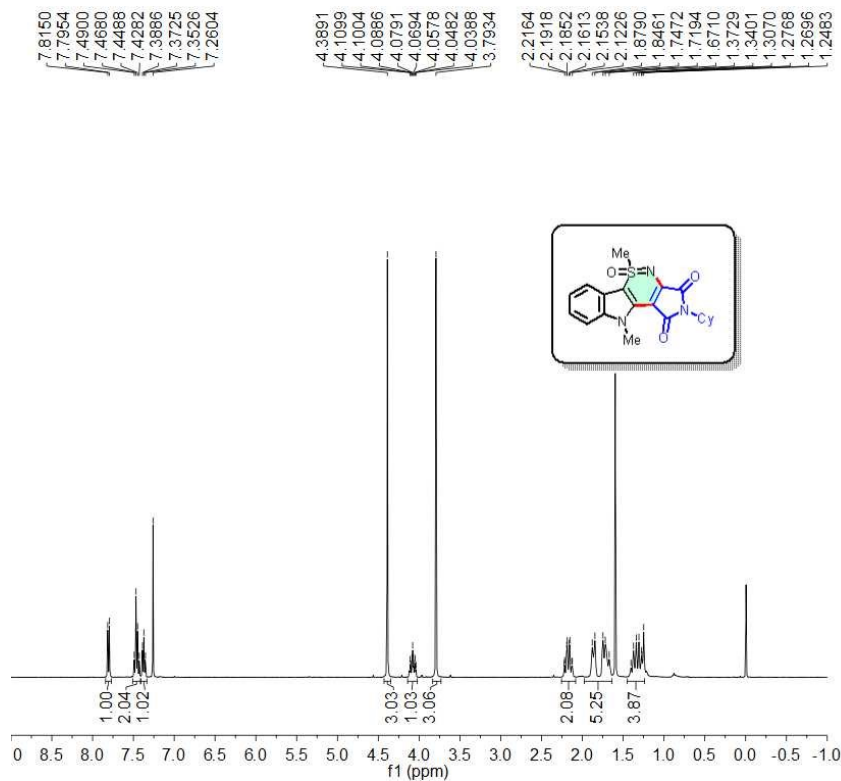

| Parameter                  | Value                                           |
|----------------------------|-------------------------------------------------|
| 1 Data File Name           | C:/171/pdata/1/1r                               |
| 2 Title                    | 23-1-syj-H.171.1.1r                             |
| 3 Comment                  |                                                 |
| 4 Origin                   | Bruker BioSpin GmbH                             |
| 5 Owner                    | nmrsu                                           |
| 6 Site                     |                                                 |
| 7 Spectrometer             | Avance NEO 400                                  |
| 8 Author                   |                                                 |
| 9 Solvent                  | CDCl3                                           |
| 10 Temperature             | 294.3                                           |
| 11 Pulse Sequence          | zg30                                            |
| 12 Experiment              | ID                                              |
| 13 Probe                   | Z163739_0511 (PI HR-BBO400S1-BBF/ H/D-5.0-Z SP) |
| 14 Number of Scans         | 4                                               |
| 15 Receiver Gain           | 101                                             |
| 16 Relaxation Delay        | 1.0000                                          |
| 17 Pulse Width             | 8.0000                                          |
| 18 Presaturation Frequency |                                                 |
| 19 Acquisition Time        | 3.9977                                          |
| 20 Acquisition Date        | 2023-04-15T10:04:01                             |
| 21 Modification Date       | 2023-04-15T10:04:16                             |
| 22 Class                   |                                                 |
| 23 Spectrometer Frequency  | 400.15                                          |
| 24 Spectral Width          | 8196.7                                          |
| 25 Lowest Frequency        | -1637.0                                         |
| 26 Nucleus                 | 1H                                              |
| 27 Acquired Size           | 32768                                           |
| 28 Spectral Size           | 65536                                           |

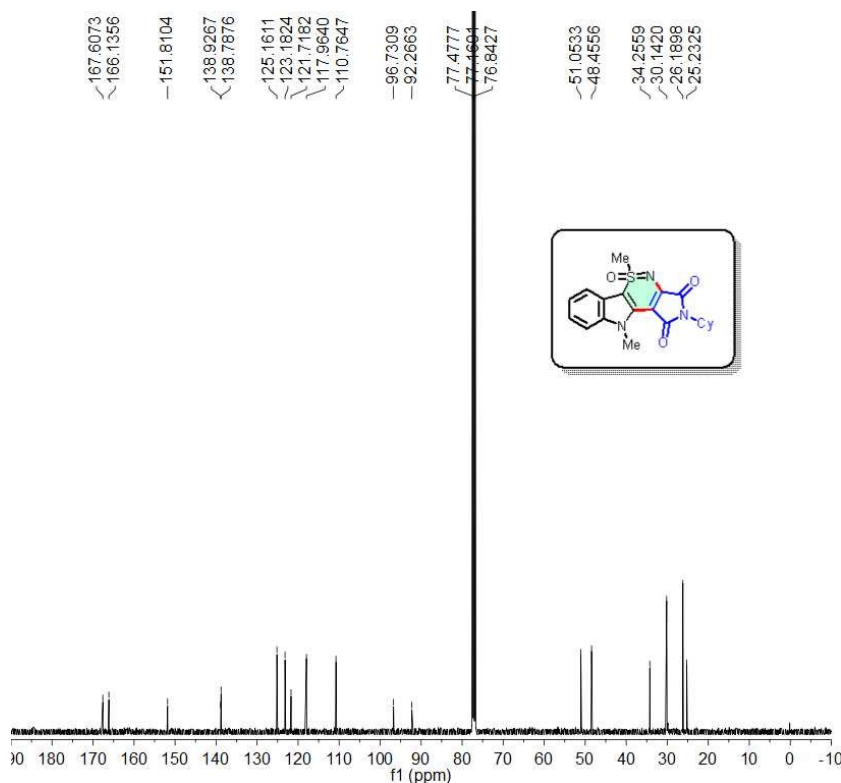

| Parameter                  | Value                                           |
|----------------------------|-------------------------------------------------|
| 1 Data File Name           | C:/46/pdata/1/1r                                |
| 2 Title                    | 23-1-syj-C.46.1.1r                              |
| 3 Comment                  |                                                 |
| 4 Origin                   | Bruker BioSpin GmbH                             |
| 5 Owner                    | nmrsu                                           |
| 6 Site                     |                                                 |
| 7 Spectrometer             | Avance NEO 400                                  |
| 8 Author                   |                                                 |
| 9 Solvent                  | CDCl3                                           |
| 10 Temperature             | 295.1                                           |
| 11 Pulse Sequence          | zgpg30                                          |
| 12 Experiment              | ID                                              |
| 13 Probe                   | Z163739_0511 (PI HR-BBO400S1-BBF/ H/D-5.0-Z SP) |
| 14 Number of Scans         | 1024                                            |
| 15 Receiver Gain           | 16                                              |
| 16 Relaxation Delay        | 2.0000                                          |
| 17 Pulse Width             | 8.0000                                          |
| 18 Presaturation Frequency |                                                 |
| 19 Acquisition Time        | 1.3763                                          |
| 20 Acquisition Date        | 2023-04-15T14:29:01                             |
| 21 Modification Date       | 2023-04-15T14:29:16                             |
| 22 Class                   |                                                 |
| 23 Spectrometer Frequency  | 100.62                                          |
| 24 Spectral Width          | 23809.5                                         |
| 25 Lowest Frequency        | -1831.2                                         |
| 26 Nucleus                 | 13C                                             |
| 27 Acquired Size           | 32768                                           |
| 28 Spectral Size           | 32768                                           |

## 2-Benzyl-5-methyl-1*H*-5λ<sup>4</sup>-pyrrolo[3,4-*c*]thieno[3,2-*e*][1,2]thiazine-1,3(2*H*)-dione 5-oxide (7)

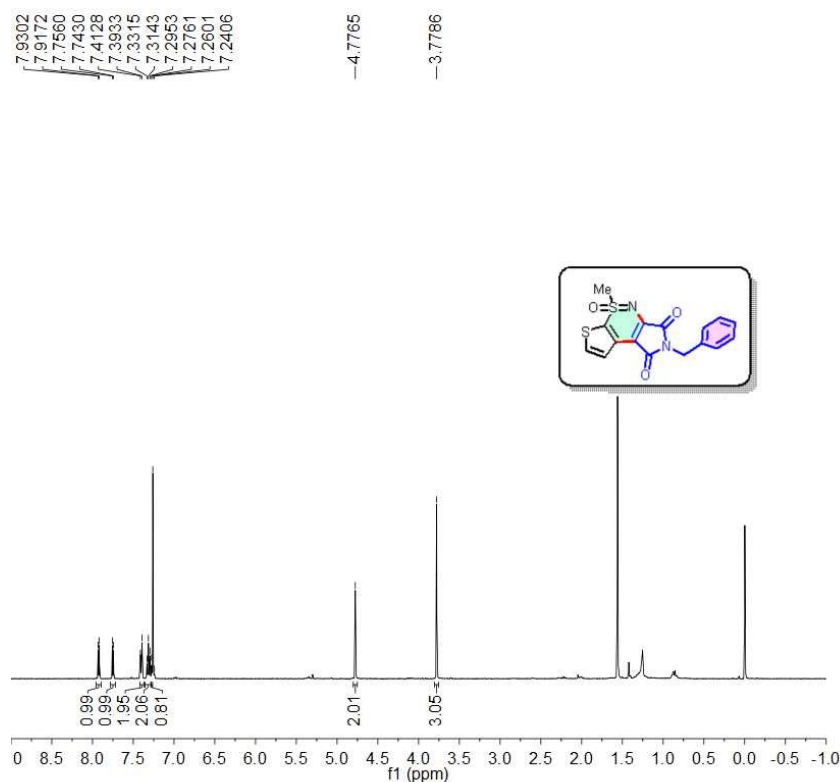

| Parameter                  | Value                                              |
|----------------------------|----------------------------------------------------|
| 1 Data File Name           | C:/Users/Administrator/Desktop/补充产物/184/pdata/1/1r |
| 2 Title                    | 23-1-syj-H.184.1.1r                                |
| 3 Comment                  |                                                    |
| 4 Origin                   | Bruker BioSpin GmbH                                |
| 5 Owner                    | nmrsu                                              |
| 6 Site                     |                                                    |
| 7 Spectrometer             | Avance NEO 400                                     |
| 8 Author                   |                                                    |
| 9 Solvent                  | CDCl3                                              |
| 10 Temperature             | 295.3                                              |
| 11 Pulse Sequence          | zg30                                               |
| 12 Experiment              | 1D                                                 |
| 13 Probe                   | Z163739_0511 (PI HR-BBO400S1-BBF/H/D-5.0-Z SP)     |
| 14 Number of Scans         | 4                                                  |
| 15 Receiver Gain           | 101                                                |
| 16 Relaxation Delay        | 1.0000                                             |
| 17 Pulse Width             | 8.0000                                             |
| 18 Presaturation Frequency |                                                    |
| 19 Acquisition Time        | 3.9977                                             |
| 20 Acquisition Date        | 2023-04-21T21:33:04                                |
| 21 Modification Date       | 2023-04-21T21:33:24                                |
| 22 Class                   |                                                    |
| 23 Spectrometer Frequency  | 400.15                                             |
| 24 Spectral Width          | 8196.7                                             |
| 25 Lowest Frequency        | -1637.0                                            |
| 26 Nucleus                 | 1H                                                 |
| 27 Acquired Size           | 32768                                              |
| 28 Spectral Size           | 65536                                              |

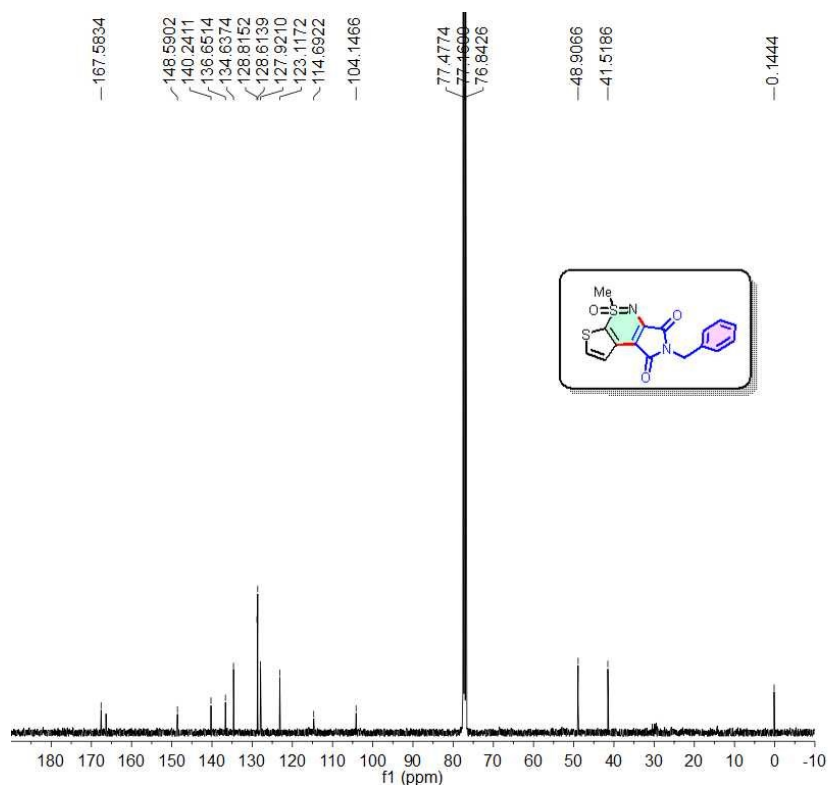

| Parameter                  | Value                                             |
|----------------------------|---------------------------------------------------|
| 1 Data File Name           | C:/Users/Administrator/Desktop/补充产物/40/pdata/1/1r |
| 2 Title                    | 2023-1-syj-C.40.1.1r                              |
| 3 Comment                  |                                                   |
| 4 Origin                   | Bruker BioSpin GmbH                               |
| 5 Owner                    | nmrsu                                             |
| 6 Site                     |                                                   |
| 7 Spectrometer             | Avance NEO 400                                    |
| 8 Author                   |                                                   |
| 9 Solvent                  | CDCl3                                             |
| 10 Temperature             | 296.0                                             |
| 11 Pulse Sequence          | zgpg30                                            |
| 12 Experiment              | 1D                                                |
| 13 Probe                   | Z163739_0032 (PI HR-400-S1-BBF/H/D-5.0-Z SP)      |
| 14 Number of Scans         | 8210                                              |
| 15 Receiver Gain           | 16                                                |
| 16 Relaxation Delay        | 2.0000                                            |
| 17 Pulse Width             | 10.0000                                           |
| 18 Presaturation Frequency |                                                   |
| 19 Acquisition Time        | 1.3763                                            |
| 20 Acquisition Date        | 2023-04-22T08:06:07                               |
| 21 Modification Date       | 2023-04-22T08:05:48                               |
| 22 Class                   |                                                   |
| 23 Spectrometer Frequency  | 100.61                                            |
| 24 Spectral Width          | 23809.5                                           |
| 25 Lowest Frequency        | -1830.3                                           |
| 26 Nucleus                 | 13C                                               |
| 27 Acquired Size           | 32768                                             |
| 28 Spectral Size           | 32768                                             |



**2-Ethyl-5-methyl-8-phenyl-1*H*-5λ<sup>4</sup>-benzo[e]pyrrolo[3,4-*c*][1,2]thiazine-1,3(2*H*)-dione 5-oxide (product 8)**

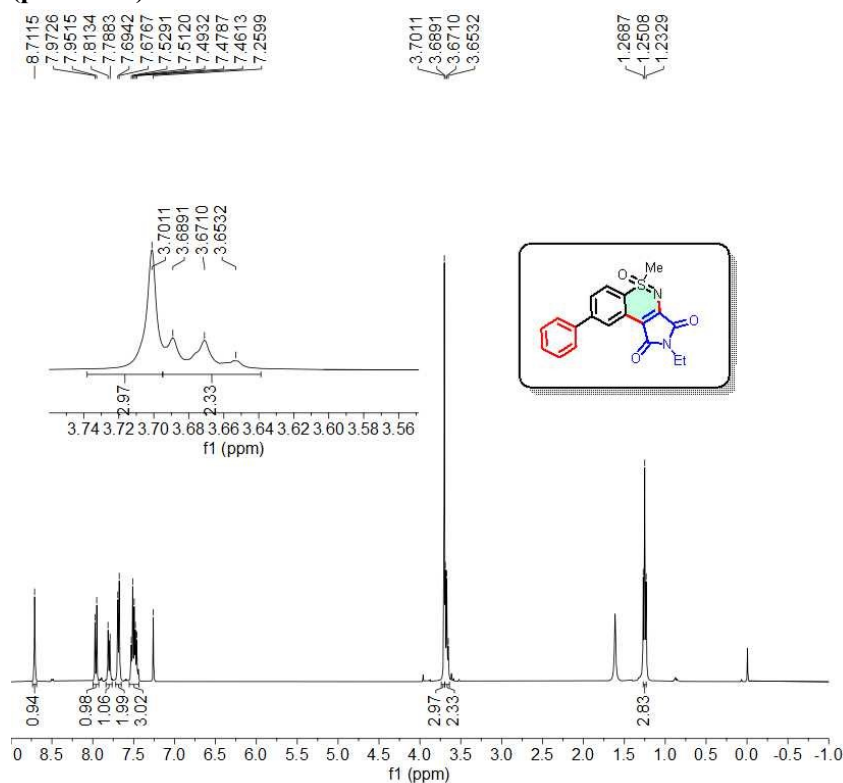

| Parameter                  | Value                                           |
|----------------------------|-------------------------------------------------|
| 1 Data File Name           | H:/wys/264/pdata/1/lr                           |
| 2 Title                    | 23-2-syj-H264.1.lr                              |
| 3 Comment                  |                                                 |
| 4 Origin                   | Bruker BioSpin GmbH                             |
| 5 Owner                    | nmrsu                                           |
| 6 Site                     |                                                 |
| 7 Spectrometer             | Avance NEO 400                                  |
| 8 Author                   |                                                 |
| 9 Solvent                  | CDCl3                                           |
| 10 Temperature             | 296.4                                           |
| 11 Pulse Sequence          | zg30                                            |
| 12 Experiment              | 1D                                              |
| 13 Probe                   | Z163739_0511 (PI HR-BBO400S1-BBF/ H/D-5.0-Z SP) |
| 14 Number of Scans         | 4                                               |
| 15 Receiver Gain           | 101                                             |
| 16 Relaxation Delay        | 1.0000                                          |
| 17 Pulse Width             | 8.0000                                          |
| 18 Presaturation Frequency |                                                 |
| 19 Acquisition Time        | 3.9977                                          |
| 20 Acquisition Date        | 2023-11-07T21:49:45                             |
| 21 Modification Date       | 2023-11-07T21:49:50                             |
| 22 Class                   |                                                 |
| 23 Spectrometer Frequency  | 400.15                                          |
| 24 Spectral Width          | 8196.7                                          |
| 25 Lowest Frequency        | -1637.0                                         |
| 26 Nucleus                 | 1H                                              |
| 27 Acquired Size           | 32768                                           |
| 28 Spectral Size           | 65336                                           |

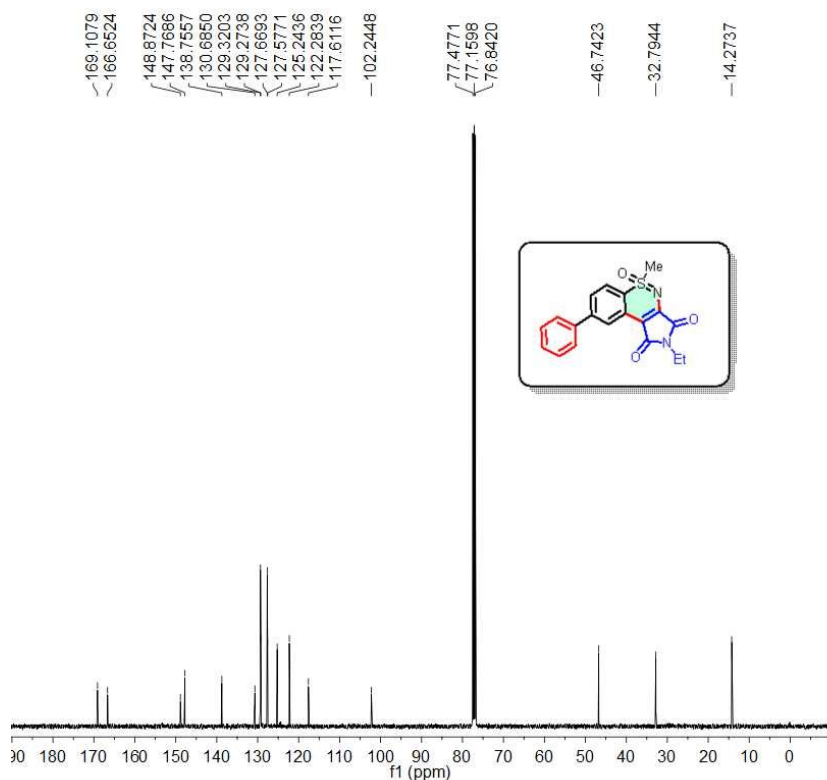

| Parameter                  | Value                                           |
|----------------------------|-------------------------------------------------|
| 1 Data File Name           | H:/wys/71/pdata/1/lr                            |
| 2 Title                    | 23-2-syj-C.71.1.lr                              |
| 3 Comment                  |                                                 |
| 4 Origin                   | Bruker BioSpin GmbH                             |
| 5 Owner                    | nmrsu                                           |
| 6 Site                     |                                                 |
| 7 Spectrometer             | Avance NEO 400                                  |
| 8 Author                   |                                                 |
| 9 Solvent                  | CDCl3                                           |
| 10 Temperature             | 297.1                                           |
| 11 Pulse Sequence          | zgpg30                                          |
| 12 Experiment              | 1D                                              |
| 13 Probe                   | Z163739_0511 (PI HR-BBO400S1-BBF/ H/D-5.0-Z SP) |
| 14 Number of Scans         | 1024                                            |
| 15 Receiver Gain           | 25                                              |
| 16 Relaxation Delay        | 2.0000                                          |
| 17 Pulse Width             | 8.0000                                          |
| 18 Presaturation Frequency |                                                 |
| 19 Acquisition Time        | 1.3763                                          |
| 20 Acquisition Date        | 2023-11-08T00:59:29                             |
| 21 Modification Date       | 2023-11-08T00:59:34                             |
| 22 Class                   |                                                 |
| 23 Spectrometer Frequency  | 100.62                                          |
| 24 Spectral Width          | 23809.5                                         |
| 25 Lowest Frequency        | -1831.5                                         |
| 26 Nucleus                 | 13C                                             |
| 27 Acquired Size           | 32768                                           |
| 28 Spectral Size           | 32768                                           |

**2-Ethyl-5-methyl-8-(phenylethynyl)-1*H*-5λ<sup>4</sup>-benzo[e]pyrrolo[3,4-*c*][1,2]thiazine-1,3(2*H*)-dione 5-oxide (product 9)**

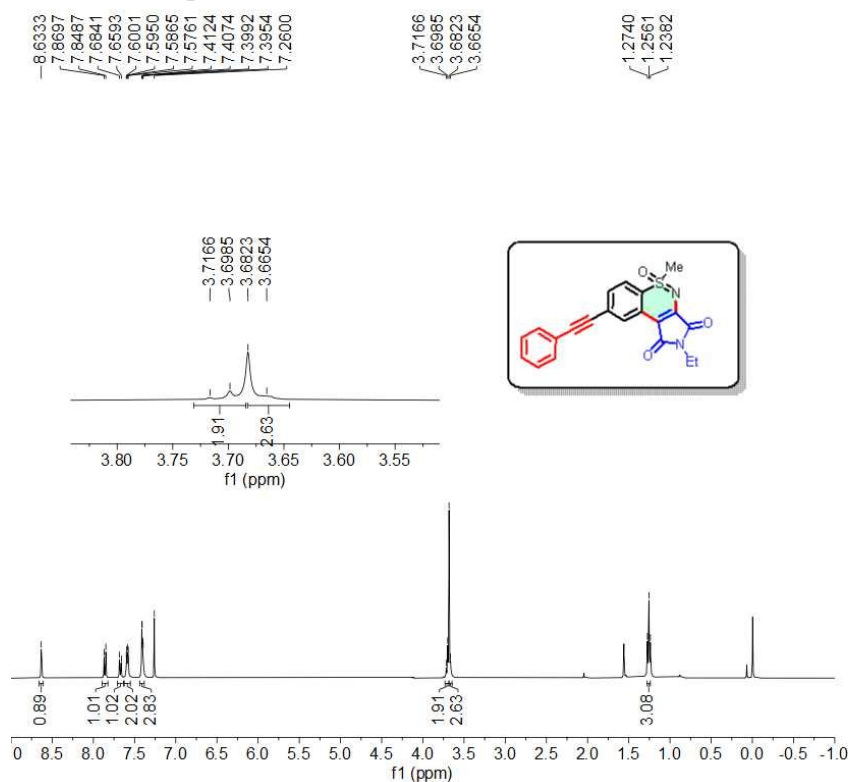

| Parameter                  | Value                                            |
|----------------------------|--------------------------------------------------|
| 1 Data File Name           | H:/ wvs/ 48/ pdata/ 1/ lr                        |
| 2 Title                    | 23-2-hvw-H.48.1.Ir                               |
| 3 Comment                  |                                                  |
| 4 Origin                   | Bruker BioSpin GmbH                              |
| 5 Owner                    | nmrsu                                            |
| 6 Site                     |                                                  |
| 7 Spectrometer             | Avance NEO 400                                   |
| 8 Author                   |                                                  |
| 9 Solvent                  | CDCl3                                            |
| 10 Temperature             | 295.8                                            |
| 11 Pulse Sequence          | zg30                                             |
| 12 Experiment              | ID                                               |
| 13 Probe                   | Z163739_0511 (PI HR-BBO400S1-BBF/ H/ D-5.0-Z SP) |
| 14 Number of Scans         | 4                                                |
| 15 Receiver Gain           | 101                                              |
| 16 Relaxation Delay        | 1.0000                                           |
| 17 Pulse Width             | 8.0000                                           |
| 18 Presaturation Frequency |                                                  |
| 19 Acquisition Time        | 3.9977                                           |
| 20 Acquisition Date        | 2023-11-24T07:23:57                              |
| 21 Modification Date       | 2023-11-24T07:23:14                              |
| 22 Class                   |                                                  |
| 23 Spectrometer Frequency  | 400.15                                           |
| 24 Spectral Width          | 8196.7                                           |
| 25 Lowest Frequency        | -1637.0                                          |
| 26 Nucleus                 | 1H                                               |
| 27 Acquired Size           | 32768                                            |
| 28 Spectral Size           | 65526                                            |

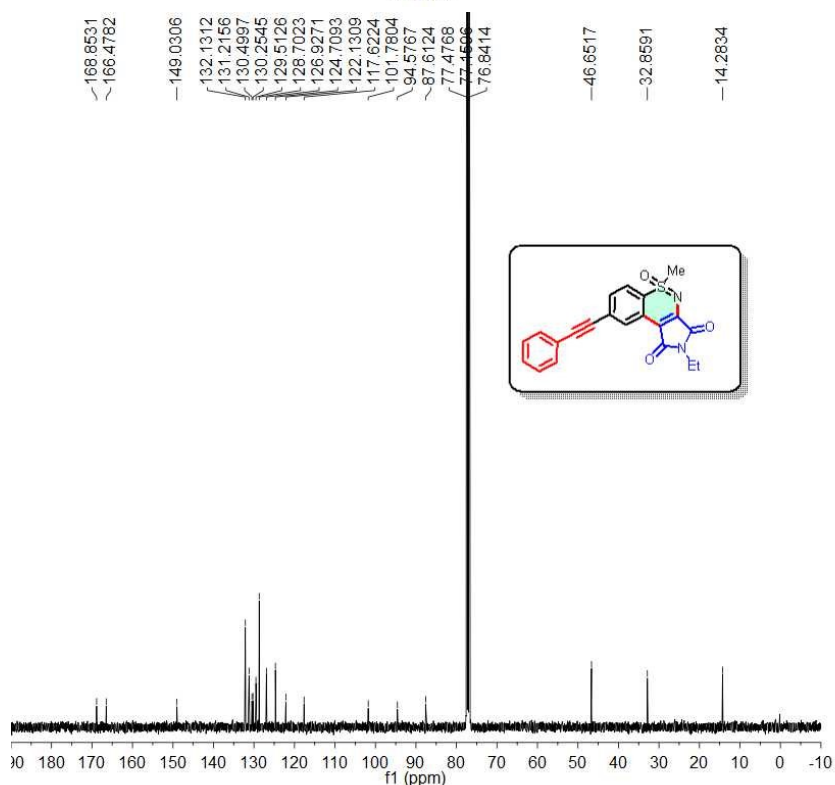

| Parameter                  | Value                                            |
|----------------------------|--------------------------------------------------|
| 1 Data File Name           | H:/ wvs/ 50/ pdata/ 1/ lr                        |
| 2 Title                    | 23-2-hvw-C.50.1.Ir                               |
| 3 Comment                  |                                                  |
| 4 Origin                   | Bruker BioSpin GmbH                              |
| 5 Owner                    | nmrsu                                            |
| 6 Site                     |                                                  |
| 7 Spectrometer             | Avance NEO 400                                   |
| 8 Author                   |                                                  |
| 9 Solvent                  | CDCl3                                            |
| 10 Temperature             | 296.5                                            |
| 11 Pulse Sequence          | zgpg30                                           |
| 12 Experiment              | ID                                               |
| 13 Probe                   | Z163739_0511 (PI HR-BBO400S1-BBF/ H/ D-5.0-Z SP) |
| 14 Number of Scans         | 901                                              |
| 15 Receiver Gain           | 25                                               |
| 16 Relaxation Delay        | 2.0000                                           |
| 17 Pulse Width             | 8.0000                                           |
| 18 Presaturation Frequency |                                                  |
| 19 Acquisition Time        | 1.3763                                           |
| 20 Acquisition Date        | 2023-11-24T08:17:07                              |
| 21 Modification Date       | 2023-11-24T08:16:24                              |
| 22 Class                   |                                                  |
| 23 Spectrometer Frequency  | 100.62                                           |
| 24 Spectral Width          | 23809.5                                          |
| 25 Lowest Frequency        | -1830.2                                          |
| 26 Nucleus                 | 13C                                              |
| 27 Acquired Size           | 32768                                            |
| 28 Spectral Size           | 32768                                            |
